# Supplementary material for: Systematic literature review on which maternal alcohol behaviours are related to fetal alcohol spectrum disorders (FASD)
Source: PubMed Central journal article supplement — BMJ Open. 2018 Dec 19;8(12):e022578. doi: 10.1136/bmjopen-2018-022578 (PMC6303602; doi:10.1136/bmjopen-2018-022578), 2018-12-19
Supplement: bmjopen-2018-022578.draft_revisions.pdf [file bmjopen-2018-022578.draft_revisions.pdf]

# BMJ Open

BMJ Open is committed to open peer review. As part of this commitment we make the peer review history of every article we publish publicly available.

When an article is published we post the peer reviewers' comments and the authors' responses online. We also post the versions of the paper that were used during peer review. These are the versions that the peer review comments apply to.

The versions of the paper that follow are the versions that were submitted during the peer review process. They are not the versions of record or the final published versions. They should not be cited or distributed as the published version of this manuscript.

BMJ Open is an open access journal and the full, final, typeset and author-corrected version of record of the manuscript is available on our site with no access controls, subscription charges or pay-per-view fees (<http://bmjopen.bmj.com>).

If you have any questions on BMJ Open's open peer review process please email [info.bmjopen@bmj.com](mailto:info.bmjopen@bmj.com)

# BMJ Open

## Systematic literature review on which maternal alcohol behaviors are related to Fetal Alcohol Spectrum Disorders (FASD).

|                               |                                                                                                                                                                                                                                                                                                                                                                                                                                                                                                                                                                                                                                                                                                                                                                                                                                                                                                                                                                                                                                    |
|-------------------------------|------------------------------------------------------------------------------------------------------------------------------------------------------------------------------------------------------------------------------------------------------------------------------------------------------------------------------------------------------------------------------------------------------------------------------------------------------------------------------------------------------------------------------------------------------------------------------------------------------------------------------------------------------------------------------------------------------------------------------------------------------------------------------------------------------------------------------------------------------------------------------------------------------------------------------------------------------------------------------------------------------------------------------------|
| Journal:                      | <i>BMJ Open</i>                                                                                                                                                                                                                                                                                                                                                                                                                                                                                                                                                                                                                                                                                                                                                                                                                                                                                                                                                                                                                    |
| Manuscript ID                 | bmjopen-2018-022578                                                                                                                                                                                                                                                                                                                                                                                                                                                                                                                                                                                                                                                                                                                                                                                                                                                                                                                                                                                                                |
| Article Type:                 | Research                                                                                                                                                                                                                                                                                                                                                                                                                                                                                                                                                                                                                                                                                                                                                                                                                                                                                                                                                                                                                           |
| Date Submitted by the Author: | 13-Mar-2018                                                                                                                                                                                                                                                                                                                                                                                                                                                                                                                                                                                                                                                                                                                                                                                                                                                                                                                                                                                                                        |
| Complete List of Authors:     | Roozen, Sylvia; Governor Kremers Centre, Maastricht University Medical Centre; Maastricht University, Department of Work and Social Psychology<br>Peters, Gjalte-Jorn; Open University, Faculty of Psychology and Education Science; Maastricht University, Work and Social Psychology<br>Kok, Gerjo; Governor Kremers Centre, Maastricht University Medical Centre; Maastricht University, Department of Work and Social Psychology<br>Townend, David; Governor Kremers Centre, Maastricht University Medical Centre; Maastricht University, Department of Health, Ethics & Society<br>Nijhuis, Jan; Governor Kremers Centre, Maastricht University Medical Centre; Maastricht University Medical Centre, Department of Obstetrics & Gynaecology<br>Koek, Ger; Governor Kremers Centre, Maastricht University Medical Centre; Maastricht University Medical Centre, Department of Internal Medicine, Division of Gastroenterology and Hepatology<br>Curfs, Leopold; Governor Kremers Centre, Maastricht University Medical Centre |
| Keywords:                     | Prenatal diagnosis < OBSTETRICS, Substance misuse < PSYCHIATRY, PREVENTIVE MEDICINE                                                                                                                                                                                                                                                                                                                                                                                                                                                                                                                                                                                                                                                                                                                                                                                                                                                                                                                                                |
|                               |                                                                                                                                                                                                                                                                                                                                                                                                                                                                                                                                                                                                                                                                                                                                                                                                                                                                                                                                                                                                                                    |

SCHOLARONE™  
Manuscripts

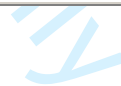

# Systematic literature review on which maternal alcohol behaviors are related to Fetal Alcohol Spectrum Disorders (FASD).

Sylvia Roozen<sup>1,2</sup>

sylvia.roozen@maastrichtuniversity.nl

<sup>1</sup> Governor Kremers Centre, Maastricht University Medical Centre, PO Box 5800, 6202 AZ Maastricht, the Netherlands

<sup>2</sup> Department of Work and Social Psychology, Maastricht University, PO Box 616, 6200 MD Maastricht, the Netherlands

Gjalt-Jorn Y. Peters<sup>2,3</sup>

gjalt-jorn@behaviorchange.eu

<sup>2</sup> Department of Work and Social Psychology, Maastricht University, PO Box 616, 6200 MD Maastricht, the Netherlands

<sup>3</sup> Faculty of Psychology and Education Science, Open University of The Netherlands, PO Box 2960, 6401 DL Heerlen, the Netherlands

Gerjo Kok<sup>1,2</sup>

g.kok@maastrichtuniversity.nl

<sup>1</sup> Governor Kremers Centre, Maastricht University Medical Centre, PO Box 5800, 6202 AZ Maastricht, the Netherlands

<sup>2</sup> Department of Work and Social Psychology, Maastricht University, PO Box 616, 6200 MD Maastricht, the Netherlands

David Townend<sup>1,4</sup>

d.townend@maastrichtuniversity.nl

<sup>1</sup> Governor Kremers Centre, Maastricht University Medical Centre, PO Box 5800, 6202 AZ Maastricht, the Netherlands

<sup>4</sup> Department of Health, Ethics & Society, Maastricht University, PO Box 616, 6200 MD Maastricht, the Netherlands

1  
2  
3  
4  
5 Jan Nijhuis<sup>1,5</sup>

6 jg.nijhuis@mumc.nl  
7  
8

9  
10 <sup>1</sup> Governor Kremers Centre, Maastricht University Medical Centre, PO Box 5800, 6202 AZ Maastricht, the  
11 Netherlands

12  
13 <sup>5</sup> Department of Obstetrics & Gynaecology, Maastricht University Medical Centre, PO Box 5800, 6202 AZ  
14 Maastricht, the Netherlands  
15

16  
17 Ger Koek<sup>1,6</sup>

18 gh.koek@mumc.nl  
19  
20

21  
22 <sup>1</sup> Governor Kremers Centre, Maastricht University Medical Centre, PO Box 5800, 6202 AZ Maastricht, the  
23 Netherlands  
24

25 <sup>6</sup> Department of Internal Medicine, Division of Gastroenterology and Hepatology, Maastricht University  
26 Medical Centre, PO Box 5800, 6202 AZ Maastricht, the Netherlands  
27  
28

29  
30 Leopold Curfs<sup>1</sup>

31 leopold.curfs@maastrichtuniversity.nl  
32  
33

34  
35 <sup>1</sup> Governor Kremers Centre, Maastricht University Medical Centre, PO Box 5800, 6202 AZ Maastricht, the  
36 Netherlands  
37  
38

39 **Correspondence to:**  
40

41 Sylvia Roozen

42 Maastricht University

43 Governor Kremers Centre

44 PO Box 616, 6200 MD Maastricht, The Netherlands

45 Phone: +31 (0)43-3884108

46 Email: sylvia.roozen@maastrichtuniversity  
47  
48  
49  
50  
51  
52  
53  
54  
55  
56  
57  
58  
59  
60

1  
2  
3  
4  
5  
6  
7  
8  
9  
10  
11  
12  
13  
14  
15  
16  
17  
18  
19  
20  
21  
22  
23  
24  
25  
26  
27  
28  
29  
30  
31  
32  
33  
34  
35  
36  
37  
38  
39  
40  
41  
42  
43  
44  
45  
46  
47  
48  
49  
50  
51  
52  
53  
54  
55  
56  
57  
58  
59  
60

**Key Words:**

Prenatal diagnosis; substance misuse; preventive medicine

**Word Count 4,799**

For peer review only

## Abstract

**Objectives:** Fetal Alcohol Spectrum Disorders (FASD) is a worldwide problem. Maternal alcohol consumption is an important risk factor for FASD. It remains unknown which alcohol consumption patterns most strongly predict FASD. The objective of this study was to identify these.

**Design:** Systematic literature review.

**Methods:** We searched multiple databases up to April 2017, including English-language studies with human participants reporting maternal drinking behavior(s) related to FASD diagnosis. Substantial variation precluded aggregation of the data and meta-analysis. Instead, data were qualitatively inspected.

**Results:** All studies that measured both maternal alcohol drinking behaviors and FASD reported retrospective data on maternal drinking patterns, employing both continuous and categorical measures and exhibiting substantial heterogeneity in measures of alcohol consumption (e.g., timing of exposure, quantification of alcohol measure, definition of a standard drink). Study quality improved over time and appeared higher for studies based on active case ascertainment, especially when conducted in schools, and when behavior was assessed through interviews.

**Conclusions:** We aimed to identify specific maternal drinking behavior(s) related to FASD. The state of the literature precludes such conclusions. Evidence-based preventive measures necessitate identifying which prenatal alcohol drinking behavior(s) are most in need of intervention. Therefore, we formulate three recommendations for future research. First, future studies can optimize the value of the collected

1  
2  
3 dataset through specifying measurements and reporting of maternal drinking behaviors, and avoiding  
4  
5 categorized measures (nominal or ordinal) whenever possible. Second, samples should not be selected  
6  
7 based on FASD status, but instead, FASD status as well as maternal alcohol consumption should both be  
8  
9 measured in a general population sample. Finally, we provide ten reporting guidelines for FASD research.  
10  
11  
12  
13  
14  
15

### 16 **Strengths and limitations of this study**

- 17
- 18
- 19 • This is the first rigorous systematic synthesis, using extensive queries and a thorough screening
- 20 procedure, to summarize the data on human maternal alcohol consumption and filial FASD.
- 21
- 22 • The extant literature precludes insight into the association between those two variables.
- 23
- 24 • A rich set of recommendations was formulated as to reporting guidelines and measurement
- 25 principles.
- 26
- 27
- 28
- 29
- 30
- 31
- 32
- 33
- 34
- 35
- 36
- 37
- 38
- 39
- 40
- 41
- 42
- 43
- 44
- 45
- 46
- 47
- 48
- 49
- 50
- 51
- 52
- 53
- 54
- 55
- 56
- 57
- 58
- 59
- 60

## Introduction

Prenatal alcohol exposure is one of the leading causes of mental retardation resulting in irreversible lifelong consequences for the unborn child (e.g., neurocognitive deficits, growth deficiencies, facial dysmorphism). These adverse outcomes are also known as fetal alcohol spectrum disorders (FASD).

The spectrum encompasses various diagnostic subtypes: fetal alcohol syndrome (FAS), partial fetal alcohol syndrome (pFAS), alcohol related neurodevelopmental disorder (ARND), alcohol related birth defects (ARBD), and neurobehavioral disorder with prenatal alcohol exposure (ND-PAE) [1,2].

Epidemiological research implies that FASD is a worldwide problem. Initial FAS prevalence estimates ranged from 0.5 to 7 per 1,000 livebirths [3,4]. Recent systematic literature reviews [5,6] including multiple meta-analyses reported estimates ranging from 0.11 to 55.42 per 1,000 (FAS), 0.8 to 43.01 per 1,000 (pFAS), 0.12 to 20.25 per 1,000 (ARND), and 1.03 to 10.82 per 1,000 (ARBD), and 1.06 to 113.22 per 1,000 (FASD).

Several review articles identified maternal alcohol consumption to be an important risk factor for FASD [7,8]. Specifically, mothers of children diagnosed in the FASD spectrum reported drinking levels ranging from mild to excessive ('binge drinking') alcohol use [7,9–11] [8,12,13]. The severity of FASD may be dependent on the level, pattern, and timing of prenatal alcohol exposure before and during pregnancy [13,14], along with other confounding factors such as nutritional status of the mother, environmental factors, maternal age, and genetic makeup [14,15]. As yet, there is no known safe amount of alcohol to drink while pregnant [1,13,16,17].

Two systematic literature reviews reported associations between level of alcohol exposure and negative effects on child development [7,11]. Both reviews show the negative effects of higher amounts of alcohol intake related to various neuropsychological outcomes or a FAS diagnosis (daily alcohol consumption up



1  
2  
3 to 4 or more drinks per occasion before and during pregnancy). Less is known about fetal alterations  
4  
5 after smaller amounts of alcohol intake (less than daily drinking). Moreover, other reviews are  
6  
7 inconclusive about which behaviors are related to the outcome of FASD [5,7,11].  
8  
9

10  
11  
12 Planning evidence based health promoting programs requires an adequate understanding of which  
13  
14 maternal behavior(s) are associated with FASD. Note that maternal alcohol consumption is not the only  
15  
16 factor for filial FASD. Paternal and even grandparental consumption patterns have also been implicated  
17  
18 [18,19]. However, for the sake of this review, we limited ourselves to maternal alcohol consumption.  
19  
20 Specifically, a first step for designing prevention programs requires defining specific target behavior(s) of  
21  
22 the target population related to FASD [6,20]. However, the literature remains inconclusive about which  
23  
24 maternal drinking behaviors are related to alterations of the fetal development. Despite this conflicting  
25  
26 and inconclusive evidence of the negative effects on the developing fetus, public health  
27  
28 recommendations are made nonetheless. These recommendations share one common principle, namely  
29  
30 that complete abstinence of alcohol use during pregnancy is the safest approach to prevent any possible  
31  
32 risks to the unborn child [1,13,16,17]. However, despite this common thread, there are also many  
33  
34 differences between the recommendations. For example, the British Medical Association (BMA) lists four  
35  
36 different recommendations that are currently made in the United Kingdom alone [13]. This  
37  
38 heterogeneity is problematic because communicating multiple contrasting recommendations is  
39  
40 confusing for the target audiences. At the same time, there are good arguments to tailor the  
41  
42 recommendations. For example, it is likely that binge drinking is one of the serious risk factors and  
43  
44 associated with severe forms of FASD [21]. Therefore, it appears that special attention for specific risk  
45  
46 groups such as heavily drinking pregnant women is warranted.  
47  
48  
49  
50  
51  
52  
53  
54  
55  
56  
57  
58  
59  
60

1  
2  
3 Yet, implementing such a tailored approach is currently hindered by the lack of knowledge regarding the  
4  
5 dose-response relationship and potential moderators. On the one hand, insufficient evidence is available  
6  
7 about the association of different alcohol-related behaviors to FASD-related risk, especially low doses of  
8  
9 alcohol, to adequately delineate target groups to enable tailored communication. This would seem to  
10  
11 justify foregoing the heterogeneous recommendations and instead converging on an abstinence  
12  
13 recommendation. However, in some target populations, such a total abstinence recommendation does  
14  
15 not seem feasible. Especially high-risk populations, for example heavily drinking women, may not be able  
16  
17 to completely eliminate their alcohol intake, for example because of personal factors such as self-  
18  
19 regulation skills, or environmental factors such as social pressures. Given that a total abstinence  
20  
21 recommendation may be unrealistic for some of the highest-risk populations, such a recommendation  
22  
23 can be ethically problematic.  
24  
25  
26  
27  
28

---

29  
30 Figure 1 about here  
31  
32  
33

34 To illustrate this, consider Figure 1. This Figure shows two potential dose-response relationships between  
35  
36 weekly maternal alcohol consumption and risk of filial FASD. The left panel shows a sigmoid relationship,  
37  
38 where risk remains low if less than five units are consumed weekly, whereas in the linear dose-response  
39  
40 relationship depicted in the right panel, risk is already considerable at five consumptions weekly. For  
41  
42 those subpopulations where abstinence recommendations may be unrealistic, if the dose-response  
43  
44 relationship is similar to that shown in the left panel, a harm reduction message such as 'consume at  
45  
46 most five units' (the yellow areas in Figure 1) may be easier to defend than if the dose-response  
47  
48 relationship is linear. Not only may such a message be easier to defend: it may be more effective at  
49  
50 decreasing FASD prevalence. Setting unachievable goals has little behavior change potential [22], and if a  
51  
52 more achievable goal can stimulate the target population to moderate their alcohol intake enough to  
53  
54  
55  
56  
57  
58  
59  
60

1  
2  
3 decrease the risk of FASD, while an abstinence message, being unrealistic, has no effect, the ethics of an  
4  
5 abstinence message become questionable. If, however, the risk increases very rapidly even with light  
6  
7 alcohol consumption, deviating from an abstinence message may be damaging.  
8  
9

10  
11  
12 Further research is warranted to identify behaviors for health promotion programs to target on.  
13

14 Developing health promoting programs aiming at reducing alcohol consumption during pregnancy first  
15  
16 requires identifying which prenatal alcohol drinking behavior(s) are most in need of intervention. The  
17  
18 purpose of the present study is to conduct a systematic literature review and meta-analysis to identify  
19  
20 those maternal alcohol drinking behaviors most strongly related to FASD.  
21  
22  
23  
24

## 25 **Materials and Methods**

26  
27  
28

29 The PRISMA guideline was followed [23], also available at the Open Science Framework repository for  
30  
31 this study [https://osf.io/whq45/?view\\_only=6d5fddf71e493f999036753326c950](https://osf.io/whq45/?view_only=6d5fddf71e493f999036753326c950).  
32  
33  
34  
35

### 36 *Ethics statement and patient and public involvement*

37

38 The current study extracted data from online databases and did not involve participation of participants;  
39  
40 therefore, it was not necessary to obtain ethical permission.  
41  
42  
43  
44

### 45 *Search strategy and criteria*

46

47 A search was conducted in PubMed, PsychINFO, PsychARTICLES, ERIC, CINAHL, EMBASE and MEDLINE  
48  
49 databases up to August 2015 using an extensive query consisting of keywords related to FASD, pregnancy  
50  
51 and behavior (e.g., fetal alcohol syndrome, pregnancy, alcohol use, risk factor). We reran the query just  
52  
53 before submitting the manuscript including databases up to April 2017. Moreover, gray literature was  
54  
55  
56  
57  
58  
59  
60

1  
2  
3 inspected through the reference list of included articles (for further inspection see the Open Science  
4  
5 Framework repository for this study  
6  
7 [https://osf.io/whq45/?view\\_only=6d5fddfeb71e493f999036753326c950](https://osf.io/whq45/?view_only=6d5fddfeb71e493f999036753326c950)).  
8  
9  
10

### 11 *Study selection*

12  
13  
14 Resulting hits from the query were exported and screened by two independent screeners in three  
15  
16 rounds. The first screening round was based on titles only; the second, on titles and abstracts; and the  
17  
18 third, on the full text articles. Records were included if they were written in English and reported  
19  
20 maternal alcohol related behaviors associated with a FASD diagnosis. Records that were duplicates,  
21  
22 concerned reviews or meta-analysis, or concerned studies that involved non-human subjects were  
23  
24 excluded.  
25  
26  
27  
28  
29

### 30 *Data extraction*

31  
32 Data were transferred onto extraction forms, which were templated source code files for R [24], using  
33  
34 Notepad++. Researcher SR completed all extraction forms including the following variables: sampling  
35  
36 method (retrospective versus prospective), sampling selection (select versus aselect), variables on which  
37  
38 controls were matched (e.g., age mother, study year of the child), recruitment setting (e.g., school,  
39  
40 clinic), descent (native versus nonnative population), geography, year of data collection, sample size,  
41  
42 subsamples, method of diagnosis (e.g., IOM, 4-digit), syndrome category (e.g., FAS, ARND), datatype  
43  
44 (e.g., aggregate, question), datatype levels (e.g., nominal, logical), confirmed maternal alcohol exposure,  
45  
46 method of case ascertainment (active versus passive), data collection method (self-report versus  
47  
48 interview). Moreover, variables related to drinking behaviors were extracted. Specifically, period of  
49  
50 alcohol consumption (e.g., first trimester, before pregnancy), timeframe (concurrent versus  
51  
52 retrospective), intensity specification (e.g., any day, weekend day), specification of units (e.g., oz, mg),  
53  
54  
55  
56  
57  
58  
59  
60

1  
2  
3 specification of timeframe (e.g., per year, per month), bingeing, and alcoholism. Also, when no indication  
4  
5 of one standard drink was provided, the units in grams were granted depending on country and their  
6  
7 national alcohol guidelines (e.g., one standard drink in the United States = 14 gr, Australia = 10 gr; for  
8  
9 more detailed information see the Open Science Framework repository for this study  
10  
11 [https://osf.io/whq45/?view\\_only=6d5fddfeb71e493f999036753326c950](https://osf.io/whq45/?view_only=6d5fddfeb71e493f999036753326c950)). These extraction forms were  
12  
13 then read into R and processed by an R script.  
14  
15

### 16 17 18 *Quality assessment*

19  
20 A slightly adapted version of the Newcastle–Ottawa Scale (NOS) was used for assessing the quality of  
21  
22 nonrandomized studies for further meta-analysis with a maximum of 10 stars [25] (for more detailed  
23  
24 information see the Open Science Framework repository for this study  
25  
26 [https://osf.io/whq45/?view\\_only=6d5fddfeb71e493f999036753326c950](https://osf.io/whq45/?view_only=6d5fddfeb71e493f999036753326c950)). The quality of each  
27  
28 publication was assessed by two independent reviewers (inter rater reliability = 80%). Differences were  
29  
30 settled by discussion.  
31  
32  
33

### 34 35 36 *Data synthesis and statistical analysis*

37  
38 In case of sufficient homogeneity, meta-analyses and meta-regressions were to be conducted using  
39  
40 metafor, a free package in R [26].  
41  
42  
43  
44  
45

---

46  
47 Figure 2 About Here  
48  
49  
50  
51  
52  
53  
54  
55  
56  
57  
58  
59  
60

---

## Results

The systematic literature review resulted in 3047 identified hits (see Figure 2). Twenty hits qualified for further screening and analysis. Hits were excluded because they were duplicates, not written in English, or did not report associations between prenatal alcohol and FASD. The assessment of the included studies using the NOS scale revealed a wide range of quality scores with an average score of 6.55 out of 10 (for more details, see the Open Science Framework repository for this study [https://osf.io/whq45/?view\\_only=6d5fddfeb71e493f999036753326c950](https://osf.io/whq45/?view_only=6d5fddfeb71e493f999036753326c950)).

### *Sample characteristics*

Sample characteristics can be inspected in Table 1. First, inspection of the data shows that the included studies were reported from five different countries, including Australia ( $n = 2$ ), Croatia ( $n = 1$ ), Italy ( $n = 2$ ), South Africa ( $n = 12$ ), and United States ( $n = 3$ ). All studies were conducted after the year 1992. Almost all studies relied on interviews ( $n = 16$ ), followed by self-reports ( $n = 3$ ), and medical records ( $n = 1$ ). Moreover, all studies were based on a retrospective sampling method. Behavior was described in terms of maternal alcohol drinking related to a FASD diagnosis. Behaviors were reported before and during pregnancy where the period during pregnancy was specified per trimester (e.g., first, second, third).

Further inspection shows that alcohol consumption was operationalized differently in each study (e.g., drinks per drinking day, BAC levels; a complete table can be found in the supplemental materials, Table 1): in fact, no two studies used the same measure. Some studies reported units, whereas other studies reported subjective estimates (e.g., many, less than). Others used dichotomous measures (e.g., yes or no), a mixture of ordinal measures (e.g., none, mild, moderate, heavy), or interval variables (e.g., percentage). The original author's conclusions on maternal drinking behaviors & FASD can be inspected in the supplemental materials, Table 2.

### *Dichotomous measures*

Dichotomous measures (e.g., yes versus no) were available for 11 studies representing 36 measures (see Table 1). These included questions concerning alcohol consumption before pregnancy [7, 10, 11, 20].

Questions concerning alcohol consumption during pregnancy [2, 8] included the following variables: binge drinking without specifying how this was defined [2, 8], alcoholism [1], binge drinking (3 or more drinks per occasion; 5 or more drinks per occasion) [9, 10, 12, 13], alcohol consumption in general [7, 9, 11, 16, 18], smoking as well as binge drinking (3 or more drinks per occasion; 5 or more drinks per occasion [13]. Moreover, questions were measured if pregnant women drank alcohol during the first trimester of pregnancy [7, 9, 11, 13, 16, 20]; second trimester [7, 9, 11, 13, 16, 20]; and/ or third trimester [7, 9, 11, 13, 16, 20]. For more detailed information see the Open Science Framework repository for this study [https://osf.io/whq45/?view\\_only=6d5fddfeb71e493f999036753326c950](https://osf.io/whq45/?view_only=6d5fddfeb71e493f999036753326c950).

### *Nominal measures*

Although alcohol consumption is in fact a continuous variable, it was still operationalized at the nominal level in six nominal measures used in two studies [4, 16]. For more detailed information see the Open Science Framework repository for this study [https://osf.io/whq45/?view\\_only=6d5fddfeb71e493f999036753326c950](https://osf.io/whq45/?view_only=6d5fddfeb71e493f999036753326c950).

### *Ordinal measures*

In total, 24 ordinal measures were used in eight studies (see Table 1). These incorporated questions concerning alcohol consumption before pregnancy [3], sometimes specified in categories of units e.g., grams a week, stopped during drinking or drank less than current use [3, 5, 6, 8, 19]; and alcohol consumption during pregnancy [1], including variables measuring the categories of alcohol intake in units of e.g., grams a week [3, 14]. Moreover, questions were measured for each trimester of pregnancy;

1  
2  
3 alcohol consumption during first trimester of pregnancy [5, 8, 19] whereby variables were specified with  
4 categories e.g., drank less or drank more than current use [5, 8, 19]; alcohol consumption during second  
5 trimester [5, 6, 8, 19] using the categories e.g., drank less or drank more than current use [5, 6, 8, 19];  
6  
7 and alcohol consumption during the third trimester [5, 6, 8, 19] whereby variables were specified with  
8 categories e.g., drank less or drank more than current use [5, 6, 8, 19]. For more detailed information see  
9  
10 the Open Science Framework repository for this study  
11  
12 ([https://osf.io/whq45/?view\\_only=6d5fddf71e493f999036753326c950](https://osf.io/whq45/?view_only=6d5fddf71e493f999036753326c950)).  
13  
14  
15  
16  
17  
18

### 19 *Continuous measures*

20  
21 Surprisingly, continuous measures were only available for five studies. In total, these studies employed  
22  
23 21 measures (see Table 1). These included questions concerning alcohol consumption before pregnancy  
24  
25 [2, 8, 10, 12, 17] where variables were sometimes specified in number of drinks e.g., a day or week [8,  
26  
27 10]; and during pregnancy [10], where variables were sometimes specified in number of drinks e.g.,  
28  
29 during a drinking day, week, weekend [2, 11, 12, 17]. Moreover, number of alcoholic drinks or drinking  
30  
31 days were measured during the first trimester of pregnancy [2, 10, 12], sometimes specified in numbers  
32  
33 a day or estimated BAC [8]; number of drinks or drinking days during second trimester [2, 10, 12],  
34  
35 sometimes specified in numbers a day or estimated BAC [8]; and/ or number of drinks or drinking days  
36  
37 during third trimester [2, 10, 12], sometimes specified in numbers a day or estimated BAC [8].  
38  
39  
40  
41  
42

---

43 Table 1 About Here

---



Table 2 About Here

*Integration*

Categorical variables were based on different answer options and cut-off values, which precluded further aggregation or integration. Operationalizations on a continuous level of measurement also displayed substantial variation. Where possible, we attempted to transform these continuous measures of alcohol consumption into the same metric (e.g., one standard drink defined in grams). However, even this was hindered by heterogeneity in reported standard sizes (sometimes not reported at all), types of alcohol described, and other variation across countries. Moreover, few studies reported continuous data.

Because of these reasons, conducting meta-analyses of the continuous variables alone was not feasible.

Consultation with three independent alcohol experts (e.g., expertise in pharmacology of alcohol and measurements of alcohol drinking behaviors) revealed that aggregation of variables in the current dataset was not feasible. This substantial heterogeneity in operationalizations hindered further meta-analyses, and therefore the data will be described qualitatively below with emphasis on the used operationalizations and timing of exposure.

Because aggregation of the evidence was not possible, we instead sought to explore the heterogeneity exhibited by the included studies. Given the small number of included studies, we decided to inspect visualizations of the associations between study characteristics. We plotted the quality of the studies (NOS scores), study year, measurement level of the alcohol consumption operationalization, recruitment setting, and data collection methods.

These visualizations revealed interesting patterns. The quality of studies (NOS score) seem to improve over the years. Data derived from clinical records were mainly based on ordinal measures. NOS score

1  
2  
3 appeared higher for studies where maternal alcohol history was based on interviews. Finally, NOS scores  
4  
5 appeared higher for samples recruited through active case ascertainment, especially in schools. We have  
6  
7 included these visualizations in the Open Science Framework repository for this study  
8  
9  
10 ([https://osf.io/whq45/?view\\_only=6d5fddfeb71e493f999036753326c950](https://osf.io/whq45/?view_only=6d5fddfeb71e493f999036753326c950)).

11  
12 The wide range of variation in operationalisations provided a unique opportunity to compare them.

13  
14 Continuous measures provide detailed information about specific units (e.g., oz, standard drink, BAC). If  
15  
16 reported similarly across studies, these could be further meta-analyzed. However, this requires reporting  
17  
18 all information needed to convert the reported statistics into grams or milliliters of alcohol, to enable  
19  
20 integration with results from other countries. Other challenges appear to be present for logical, nominal  
21  
22 and ordinal measures (e.g., cut-off scores). Some studies reported categories e.g., binge drinking  
23  
24 including 3 or more drinks per occasion versus 5 or more drinks per occasion [27]; less than 4 drinks a  
25  
26 day versus more than 4 drinks a day [9]. None of the studies reported a description and considerations of  
27  
28 why certain cut-off scores were chosen. Cut-off scores likely often followed recommendations by health  
29  
30 promotion agencies or suggestions from earlier studies, but without explicit specification this remains  
31  
32 unclear. Perhaps the difficulty of establishing sensible cut-off values partly explains this, as doing so  
33  
34 requires evidence syntheses to determine where exactly the effects of the relevant behavior becomes  
35  
36 qualitatively different. Such evidence (e.g., meta-analyses of maternal alcohol consumption patterns) is  
37  
38 not yet available. However, this should lead researchers to employ continuous operationalisations for  
39  
40 now, rather than selecting (more or less arbitrary) cut-off scores.  
41  
42  
43  
44  
45  
46  
47  
48  
49

## 50 Discussion

51  
52  
53  
54  
55  
56  
57  
58  
59  
60

1  
2  
3 In this systematic literature review, we aimed to summarize available data of studies that reported  
4 maternal alcohol drinking behaviors in relation to FASD. Data were available for 20 studies. The majority  
5 of these 20 studies were based on retrospective self-reports or interviews. A substantial heterogeneity in  
6 the applied measures for alcohol consumption was observed. Studies were based on continuous and  
7 categorical measures (dichotomous, nominal, and ordinal). Continuous measures included blood alcohol  
8 content, percentages of drinking days, and alcohol consumption in grams or ounces. Categorical  
9 measures employed a variety of cut-offs to distinguish the different categories. This heterogeneity was  
10 so substantial that it precluded meta-analyses. Therefore, it was not possible to answer the original  
11 research question: the extant literature does not enable any conclusions as to the relationship between  
12 maternal alcohol consumption and the likelihood of infants developing FASD. Instead, however, a wealth  
13 of suggestions for future research was distilled from the literature.

14  
15  
16  
17  
18  
19  
20  
21  
22  
23  
24  
25  
26  
27  
28 The most striking finding was the variation in measurement instruments that were employed to assess  
29 maternal drinking behavior. Each of the 20 included studies operationalized measures of alcohol  
30 consumption differently. The majority of studies used categorical measures. This is not desirable as these  
31 impose a discontinuous scale using cut-off scores. Because, as this review evidences, there exists  
32 insufficient evidence to derive whether alcohol consumption (as relating to FASD risk) should be  
33 considered as a continuous or discontinuous scale, and where the cut-offs should lie in the case of a  
34 discontinuous scale, such cut-off scores are necessarily arbitrary to a degree. In addition, categorizing  
35 continuous data discards variance, thereby potentially obfuscating associations between variables [28–  
36 30]. The variation in cut-off scores exhibited in the studies included in this review supports this  
37 assumption of arbitrariness, and prohibits aggregation of the data collected in those studies. When  
38 studies did use continuous measures, studies often did not report how much grams of alcohol were in  
39 one standard drink. By making assumptions (e.g., based on the standard drink size in the country of data  
40  
41  
42  
43  
44  
45  
46  
47  
48  
49  
50  
51  
52  
53  
54  
55  
56  
57  
58  
59  
60

1  
2  
3 collection) we were able to convert most standard drink-based measures into grams of alcohol, but this  
4  
5 was not always feasible.  
6  
7

8 One of the reasons for this heterogeneity may be that none of the included studies was conducted  
9  
10 primarily to investigate the association between maternal drinking behavior and FASD: although both  
11  
12 variables were frequently measured and reported, most studies were designed to determine prevalence  
13  
14 or FASD symptoms. It appears that few or no attempts have been made to empirically establish how  
15  
16 maternal alcohol consumption is related to the likelihood of FASD. Given the comprehensive set up of  
17  
18 this literature review, it is unlikely that such attempts have been overlooked. The search query was very  
19  
20 extensive, rendering omission of relevant keywords unlikely. Screening was conducted in three screening  
21  
22 rounds, by two independent screeners, and all records flagged for inclusion by one screener were  
23  
24 retained for closer inspection. In addition, the ascendancy and descendancy approach was applied. Given  
25  
26 that reports of studies where these variables were secondary measures preclude conclusions about this  
27  
28 relationship, it is as yet not possible to establish which recommendations can be empirically justified. In  
29  
30 other words, even though in some target populations a total abstinence recommendation does not seem  
31  
32 feasible. Available literature as yet offers no clear guidance that enables exploring a recommendation  
33  
34 that could balance feasibility for the target population with dangers to health. Also Mamluk et al. [31]  
35  
36 underlined the lack of data to make robust conclusions on the harmful effects of prenatal alcohol  
37  
38 exposure and the unborn child. However, our inspection of the literature did yield a number of valuable  
39  
40 recommendations for future research.  
41  
42  
43  
44  
45

#### 46 47 *Recommendations* 48 49

50 The first recommendation is addressed specifically to epidemiological researchers, and is based on the  
51  
52 observation that the majority of studies assessed maternal drinking as part of a prevalence study.  
53  
54 Because these studies form the largest part of the available data regarding associations between  
55  
56  
57  
58  
59  
60

1  
2  
3 maternal alcohol consumption and FASD outcomes it is important to pay close attention to the  
4 measurement of alcohol consumption, even in epidemiological studies with different primary aims.  
5  
6

7  
8 Second, in general, researchers should anticipate the need to aggregate their measures of alcohol  
9 consumption with measures from other studies: in other words, conversion to consumption in metric  
10 units, such as grams of alcohol, in a specified time period such as week or month, should be possible. If  
11 such conversion cannot be performed, the study cannot contribute to an accumulation of evidence. For  
12 example, many studies did not specify what exactly constituted a unit of alcohol (i.e. one standard drink).  
13 This means that it was necessary to try and identify the definition of a unit of alcohol in the country  
14 where the data were collected, in the period where the data were collected, but even then the obtained  
15 definition was unreliable as sometimes researchers conduct studies away from their home country yet  
16 use their home countries' unit definitions when reporting the results. Another example is that if timing of  
17 exposure was not specified, it is not clear whether the behavior occurred during the first, second, or  
18 third trimester (or was an aggregate of those periods).  
19  
20  
21  
22  
23  
24  
25  
26  
27  
28  
29  
30  
31  
32

33 This recommendation translates into a number of specific suggestions. Most of these are covered by  
34 following guidelines for the measurement of alcohol consumption, such as those specified by Dawson  
35 [32] and Sobell and Sobell [33], but specifically, it is recommended that future studies assessing specific  
36 maternal drinking behaviors should report at least the following (see below for the recommended  
37 approach in each case):  
38  
39  
40  
41  
42  
43  
44

- 45 (i) how the sample was selected (e.g., retrospective) and which method was used (e.g.,  
46 convenience sampling method),  
47  
48
- 49 (ii) the maternal characteristics variables (e.g., age, descent, educational level),  
50  
51
- 52 (iii) which method (or specific questions) was used to assess maternal alcohol consumption (e.g.,  
53 alcohol timeline follow back approach),  
54  
55  
56  
57  
58  
59  
60

- (iv) the timing of exposure when assessing maternal alcohol consumption (e.g., first trimester pregnancy) ,
- (v) the frequency of exposure when assessing maternal alcohol consumption (e.g., number of exposure sessions per week or month),
- (vi) the amount of alcohol consumed per exposure session [either following the quantify/frequency or the graded frequency systems; ,32],
- (vii) the sample size,
- (viii) what was considered as one standard drink using International System of Units (i.e. grams or milliliters of alcohol),
- (ix) if discontinuous (categorical) measures cannot be avoided, , clear justification of the employed cut-offs.

The third recommendation refers to the complexity of exploring the association between maternal alcohol consumption and filial FASD. One cannot recruit children with FASD and then proceed to select children without FASD. This is not helpful because the *number* of children without FASD but with parents with matched alcohol consumption patterns is the variable of interest. The proportion of children with FASD within each group of parents with a given alcohol consumption pattern is the dependent variable to measure. For example, let us assume that in the left panel of Figure 1 (showing the sigmoid relationship), the probability of FASD is 1% if alcohol consumption is lower than 5 units; 25% if alcohol consumption is between 5 and 10 units; 75% if alcohol consumption is between 10 and 15 units; and 99% if alcohol consumption exceeds 15 units. Similarly, let us assume that in the right panel (showing the linear relationship), the probability of FASD is 12.5% if alcohol consumption is lower than 5 units; 37.5% if alcohol consumption is between 5 and 10 units; 62.5% if alcohol consumption is between 10 and 15 units; and 87.5% if alcohol consumption exceeds 15 units. This means that for 1000 parents consuming between 0 and 5 units (the yellow area), in the sigmoid scenario, 10 children will develop FASD and 990

1  
2  
3 (99 times more) will not, while in the linear scenario, 125 children develop FASD and 875 will not (7 times  
4  
5 more). Now, imagine that a researcher visits a school and screens all children for FASD, and 10 children  
6  
7 screen positive for FASD. For simplicity's sake, let us assume that the parents of all these children  
8  
9 happened to consume less than 5 units per week during pregnancy. Now, this researcher will not know  
10  
11 whether to create a matched control group that is 99 times larger (as would be the case in the sigmoid  
12  
13 scenario) or 7 times larger (as would be the case in the linear scenario). It is exactly the relative sizes of  
14  
15 these groups that is the variable to measure, and the only way to do so is to measure both maternal  
16  
17 alcohol consumption patterns and filial FASD in a large sample.  
18  
19

20  
21  
22 Based on these recommendations, the ideal design would be a large-scale<sup>1</sup> prospective study where  
23  
24 maternal and paternal alcohol consumption patterns would be assessed both using self-reports (conform  
25  
26 the recommendations made earlier) as well as objective measures such as biomarkers for alcohol  
27  
28 consumption [e.g., ethyl glucuronide which can be detected in blood; ,34]. Infants would then be  
29  
30 assessed for FASD according to the revised IOM guidelines [1] and other recommendations provided by  
31  
32 Roozen et al. [6], and the FASD prevalence would be related to alcohol consumption patterns of both  
33  
34 parents separate and in conjunction. This design also enables examination of potential confounders such  
35  
36 as social economic status or age. Such an ideal design may not always be feasible. After all, learning  
37  
38 about the association of parental drinking patterns to filial FASD requires assessing drinking patterns in  
39  
40 all pregnancies: it is not possible to start from identified FASD cases, as we explained earlier. However,  
41  
42 even when other designs are utilized, it is important that researchers anticipate data aggregation over  
43  
44 studies, and therefore attempt to provide alcohol measures in metric units.  
45  
46  
47  
48  
49

50  
51 \_\_\_\_\_  
52 <sup>1</sup> Note that what constitutes "large-scale" depends on the expected FASD prevalence in a population as well as the  
53 target behavior under investigation, e.g. abstinence versus moderated drinking, or abstinence versus regular  
54 drinking patterns. These two parameters determine the effect size of the association that is to be estimated, which  
55 in turn enables computation of the required sample size for accurate estimation of that effect size using Accuracy in  
56 Parameter Estimation (AIPE) methods.  
57  
58

1  
2  
3 The present review focused on reported data on maternal drinking behaviors. Some of the included  
4  
5 studies also reported paternal drinking patterns or grandparental drinking patterns. The role of paternal  
6  
7 drinking and transgenerational toxicity on fetal development and FASD is not well understood. A recent  
8  
9 review study by Gupta and colleagues [18] reported that paternal alcoholism alters the gene expression  
10  
11 for fetal susceptibility to FAS. In another review, Resendiz and colleagues [19] argue that  
12  
13 transgenerational toxicity may play a role in FASD etiology. Moreover, social facilitation by paternal  
14  
15 drinking is significantly associated with maternal drinking [35]. The origin of FASD is therefore not only  
16  
17 based on maternal drinking behaviors but by many other factors (e.g., genetic and epigenetic  
18  
19 predisposition, maternal body makeup, and lifestyle). Gupta and colleagues [18] emphasized that FAS  
20  
21 etiology, and also other diagnosis within the FASD spectrum, is based on a complex interaction of  
22  
23 different factors whereby cautious interpretation is warranted.  
24  
25  
26  
27  
28  
29

## 30 **Conclusion**

31  
32  
33 The current knowledge on maternal alcohol drinking behaviors in relation to FASD is limited. Behaviors  
34  
35 were measured using various techniques and operationalized differently. For evidence-based preventive  
36  
37 measures it is necessary to identify which prenatal alcohol drinking behavior(s) are most in need of  
38  
39 intervention. Several recommendations have been made that can facilitate accumulation of evidence  
40  
41 over studies. Following these recommendations can contribute to establishing the evidence base  
42  
43 required for the development of effective preventive health promoting programs.  
44  
45  
46  
47  
48  
49  
50  
51  
52  
53  
54  
55  
56  
57  
58  
59  
60



### Contributors

Authors SR, GJYP, GK, LC designed the study and directed its implementation, including quality assurance and control. Authors DT, JN, and GK helped supervising the field activities. Authors SR and GJYP conducted the literature review and analyses and prepared the Materials and Methods and the Discussion sections of the text. All other co-authors contributed to successive drafts. All authors gave significant input in preparation of the article and approved the manuscript and submission.

### Availability of data and materials

All data, analysis scripts, and other materials are publicly available at the Open Science Framework repository for this study ([https://osf.io/whq45/?view\\_only=6d5fddfeb71e493f999036753326c950](https://osf.io/whq45/?view_only=6d5fddfeb71e493f999036753326c950)).

## References

- 1 Hoyme HE, Kalberg WO, Elliott AJ, *et al.* Updated Clinical Guidelines for Diagnosing Fetal Alcohol Spectrum Disorders. *Pediatrics* 2016;**138**.
- 2 Association American Psychiatric. *Diagnostic and statistical manual of mental disorders (DSM-5®)*. American Psychiatric Pub 2013.
- 3 BMA Board of Science. *Fetal alcohol spectrum disorders A guide for healthcare professionals Fetal alcohol spectrum disorders A guide for healthcare professionals*. British Medical Association 2007.
- 4 May PA, Gossage JP, Kalberg WO, *et al.* Prevalence and epidemiologic characteristics of FASD from various research methods with an emphasis on recent in-school studies. *Dev Disabil Res Rev* 2009;**15**:176–92. doi:10.1002/ddrr.68
- 5 Popova S, Lange S, Probst C, *et al.* Estimation of national, regional, and global prevalence of alcohol use during pregnancy and fetal alcohol syndrome: a systematic review and meta-analysis. *Lancet Glob Heal* 2017;:1–10. doi:10.1016/S2214-109X(17)30021-9
- 6 Roozen S, Peters G-JY, Kok G, *et al.* Worldwide Prevalence of Fetal Alcohol Spectrum Disorders: A Systematic Literature Review Including Meta-Analysis. *Alcohol Clin Exp Res* 2016;**40**:18–32. doi:10.1111/acer.12939
- 7 Esper LH, Furtado EF. Identifying maternal risk factors associated with Fetal Alcohol Spectrum Disorders: a systematic review. *Eur Child Adolesc Psychiatry* Published Online First: 2014. doi:10.1007/s00787-014-0603-2
- 8 May PA, Tabachnick BG, Gossage JP, *et al.* Maternal risk factors predicting child physical characteristics and dysmorphology in fetal alcohol syndrome and partial fetal alcohol

- 1  
2  
3 syndrome. *Drug Alcohol Depend* 2011;**119**:18–27. doi:10.1016/j.drugalcdep.2011.05.009  
4  
5  
6 9 Cannon MJ, Dominique Y, O’Leary L a, *et al*. Characteristics and behaviors of mothers who  
7  
8 have a child with fetal alcohol syndrome. *Neurotoxicol Teratol* 2012;**34**:90–5.  
9  
10 doi:10.1016/j.ntt.2011.09.010  
11  
12  
13 10 Henderson J, Gray R, Brocklehurst P. Systematic review of effects of low-moderate  
14  
15 prenatal alcohol exposure on pregnancy outcome. *BJOG An Int J Obstet Gynaecol*  
16  
17 2007;**114**:243–52. doi:10.1111/j.1471-0528.2006.01163.x  
18  
19  
20 11 Flak AL, Su S, Bertrand J, *et al*. The association of mild, moderate, and binge prenatal  
21  
22 alcohol exposure and child neuropsychological outcomes: a meta-analysis. *Alcohol Clin*  
23  
24 *Exp Res* 2014;**38**:214–26. doi:10.1111/acer.12214  
25  
26  
27 12 Davis P, Partridge J, Storrs C. Alcohol consumption in pregnancy. How much is safe? *Arch*  
28  
29 *Dis Child* 1982;**28**:940–3.  
30  
31  
32 13 BMA Board of Science. Alcohol and pregnancy Preventing and managing fetal alcohol  
33  
34 spectrum disorders. 2016.  
35  
36  
37 14 Sullivan EV, Pfefferbaum A. Fetal alcohol spectrum disorder: pathogenesis and  
38  
39 mechanisms. *Alcohol Nerv Syst Handb Clin Neurol* 2014;**125**.  
40  
41  
42 15 Ramsay M. Genetic and epigenetic insights into fetal alcohol spectrum disorders. *Genome*  
43  
44 *Med* 2010;**2**:27. doi:10.1186/gm148  
45  
46  
47 16 Jonsson E, Salmon A, Warren KR. The international charter on prevention of fetal alcohol  
48  
49 spectrum disorder. *Lancet Glob Heal* 2014;**2**:e135-7. doi:10.1016/S2214-109X(13)70173-6  
50  
51  
52 17 WHO. Guidelines for the identification and management of substance use and substance  
53  
54 use disorders in pregnancy. Geneva: 2014.  
55  
56  
57  
58  
59  
60

- 1  
2  
3 18 Gupta KK, Gupta VK, Shirasaka T. An Update on Fetal Alcohol Syndrome - Pathogenesis,  
4 Risks, and Treatment. *Alcohol Clin Exp Res* 2016;**40**:1594–602. doi:10.1111/acer.13135  
5  
6  
7  
8 19 Resendiz M, Chen Y, Öztürk NC, *et al.* Epigenetic medicine and fetal alcohol spectrum  
9 disorders Marisol. *Epigenomics* 2013;**5**:73–86. doi:10.2217/epi.12.80.Epigenetic  
10  
11  
12  
13 20 Kok G, Gottlieb NH, Peters G-JY, *et al.* A taxonomy of behavior change methods: an  
14 Intervention Mapping approach. *Health Psychol Rev* 2016;**10**.  
15  
16  
17 doi:10.1080/17437199.2015.1077155  
18  
19  
20 21 May PA, Gossage JP. Maternal Risk Factors for Fetal Alcohol Spectrum Disorders: Not As  
21 Simple As It Might Seem. *Alcohol Res Heal* 2011;**34**:15–26.  
22  
23  
24  
25 22 Strecher VJ, Seijts GH, Kok GJ, *et al.* Goal Setting as a Strategy for Health Behavior Change.  
26  
27  
28 *Heal Educ Behav* 1995;**22**:190–200. doi:10.1177/109019819502200207  
29  
30  
31 23 Moher D, Liberati A, Tetzlaff J, *et al.* Preferred reporting items for systematic reviews and  
32 meta-analyses: the PRISMA statement. *Ann Intern Med* 2009;**151**:264–9.  
33  
34  
35 doi:10.1371/journal.pmed1000097  
36  
37  
38 24 R Development Core Team. R: A Language and Environment for Statistical Computing.  
39  
40  
41 2014.  
42  
43 25 Wells GA, Shea B, O’Connell D, *et al.* The Newcastle–Ottawa Scale (NOS) for assessing the  
44 quality of nonrandomized studies in meta-analyses. 2013. doi:10.2307/632432  
45  
46  
47 26 Viechtbauer W. Conducting meta-analyses in R with the metafor package. *J Stat Softw*  
48  
49  
50 2010;**36**:1–48.  
51  
52 27 May PA, Hamrick KJ, Corbin KD, *et al.* Dietary Intake, Nutrition, and Fetal Alcohol  
53  
54  
55 Spectrum Disorders in the Western Cape Province of South Africa. *Reprod Toxicol*  
56  
57  
58  
59  
60

- 1  
2  
3 Published Online First: 22 February 2014. doi:10.1016/j.reprotox.2014.02.002  
4  
5  
6 28 DeCoster J, Iselin A-MR, Gallucci M. A conceptual and empirical examination of  
7  
8 justifications for dichotomization. *Psychol Methods* 2009;**14**:349–66.  
9  
10 doi:10.1037/a0016956  
11  
12  
13 29 MacCallum RC, Zhang S, Preacher KJ, *et al*. On the practice of dichotomization of  
14  
15 quantitative variables. *Psychol Methods* 2002;**7**:19–40. doi:10.1037/1082-989X.7.1.19  
16  
17  
18 30 Altman DG, Royston P. The cost of dichotomising continuous variables. *BMJ*  
19  
20 2006;**332**:1080. doi:10.1136/bmj.332.7549.1080  
21  
22  
23 31 Mamluk L, Edwards HB, Savovic J, *et al*. Low alcohol consumption and pregnancy and  
24  
25 childhood outcomes: time to change guidelines indicating apparently “safe” levels of  
26  
27 alcohol during pregnancy? A systematic review and meta-analyses. *BMJ Open*  
28  
29 2017;**7**:e015410. doi:10.1136/bmjopen-2016-015410  
30  
31  
32 32 Dawson DA. Methodological issues in measuring alcohol use. *Alcohol Res Heal*  
33  
34 2003;**27**:18–29.  
35  
36  
37 33 Sobell LC, Sobell MB. Alcohol consumption measures. In: *Assessing alcohol problems: A*  
38  
39 *guide for clinicians and researchers*. 1995. 75–99.  
40  
41  
42 34 Chabenne A, Moon C, Ojo C, *et al*. Biomarkers in fetal alcohol syndrome. *Biomarkers*  
43  
44 *Genomic Med* 2014;**6**:12–22. doi:10.1016/j.bgm.2014.01.002  
45  
46  
47 35 McBride N, Johnson S. Fathers’ Role in Alcohol-Exposed Pregnancies. Systematic Review  
48  
49 of Human Studies. *Am J Prev Med* 2016;**;**1–9. doi:10.1016/j.amepre.2016.02.009  
50  
51  
52 36 Ceccanti M, Fiorentino D, Coriale G, *et al*. Maternal risk factors for fetal alcohol spectrum  
53  
54 disorders in a province in Italy. *Drug Alcohol Depend* 2014;**145**:201–8.  
55  
56  
57  
58  
59  
60

- 1  
2  
3 doi:10.1016/j.drugalcdep.2014.10.017  
4  
5  
6 37 Coyne KL, de Costa CM, Heazlewood RJ, *et al.* Pregnancy characteristics of women giving  
7  
8 birth to children with fetal alcohol syndrome in Far North Queensland. *Aust N Z J Obstet*  
9  
10 *Gynaecol* 2008;**48**:240–7. doi:10.1111/j.1479-828X.2008.00861.x  
11  
12  
13 38 Davies L, Dunn M, Chersich M, *et al.* Developmental delay of infants and young children  
14  
15 with and without fetal alcohol spectrum disorder in the Northern Cape Province, South  
16  
17 Africa. *African J Psychiatry (South Africa)* 2011;**14**:298–305.  
18  
19  
20 39 May PA, Brooke L, Gossage JP, *et al.* Epidemiology of fetal alcohol syndrome in a South  
21  
22 African community in the Western Cape Province. *Am J Public Health* 2000;**90**:1905–12.  
23  
24 doi:10.2105/ajph.90.12.1905  
25  
26  
27 40 May PA, Gossage JP, Brooke LE, *et al.* Maternal risk factors for fetal alcohol syndrome in  
28  
29 the Western Cape Province of South Africa: A population-based study. *Am J Public Health*  
30  
31 2005;**95**:1190–9. doi:10.2105/AJPH.2003.037093  
32  
33  
34  
35 41 May PA, Gossage JP, Marais A-S, *et al.* The epidemiology of fetal alcohol syndrome and  
36  
37 partial FAS in a South African community. *Drug Alcohol Depend* 2007;**88**:259–71.  
38  
39 doi:10.1016/j.drugalcdep.2006.11.007  
40  
41  
42 42 May PA, Gossage JP, Marais A-S, *et al.* Maternal risk factors for fetal alcohol syndrome  
43  
44 and partial fetal alcohol syndrome in South Africa: a third study. *Alcohol Clin Exp Res*  
45  
46 2008;**32**:738–53. doi:10.1111/j.1530-0277.2008.00634.x  
47  
48  
49  
50 43 May PA, Fiorentino D, Coriale G, *et al.* Prevalence of children with severe fetal alcohol  
51  
52 spectrum disorders in communities near Rome, Italy: new estimated rates are higher than  
53  
54 previous estimates. *Int J Environ Res Public Health* 2011;**8**:2331–51.  
55  
56  
57  
58  
59  
60

- 1  
2  
3 doi:10.3390/ijerph8062331  
4  
5  
6 44 May PA, Blankenship J, Marais AS, *et al.* Maternal alcohol consumption producing fetal  
7 alcohol spectrum disorders (FASD): Quantity, frequency, and timing of drinking. *Drug*  
8 *Alcohol Depend* 2013;**133**:502–12. doi:10.1016/j.drugalcdep.2013.07.013  
9  
10  
11  
12  
13 45 May PA, Blankenship J, Marais AS, *et al.* Approaching the Prevalence of the Full Spectrum  
14 of Fetal Alcohol Spectrum Disorders in a South African Population-Based Study. *Alcohol*  
15 *Clin Exp Res* 2013;**37**:818–30. doi:10.1111/acer.12033  
16  
17  
18  
19  
20 46 May PA, Baete A, Russo J, *et al.* Prevalence and characteristics of fetal alcohol spectrum  
21 disorders. *Pediatrics* 2014;**134**:855–66. doi:10.1542/peds.2013-3319  
22  
23  
24  
25 47 Miller LA, Shaikh T, Stanton C, *et al.* Surveillance for fetal alcohol syndrome in Colorado.  
26 *Public Heal Rep* 1995;**110**:690–7.  
27  
28  
29  
30 48 O’Leary CM, Nassar N, Kurinczuk JJ, *et al.* Prenatal alcohol exposure and risk of birth  
31 defects. *Pediatrics* 2010;**126**:e843-50. doi:10.1542/peds.2010-0256  
32  
33  
34  
35 49 Petković G, Barišić I. Prevalence of fetal alcohol syndrome and maternal characteristics in  
36 a sample of schoolchildren from a rural province of Croatia. *Int J Environ Res Public Health*  
37 2013;**10**:1547–61. doi:10.3390/ijerph10041547  
38  
39  
40  
41  
42 50 Suttie M, Foroud T, Wetherill L, *et al.* Facial Dysmorphism Across the Fetal Alcohol  
43 Spectrum. *Pediatrics* 2013;**131**:788. doi:peds.2012-1371 [pii]\r10.1542/peds.2012-1371  
44  
45  
46  
47 51 Urban M, Chersich MF, Fourie L-A, *et al.* Fetal alcohol syndrome among grade 1  
48 schoolchildren in Northern Cape Province: prevalence and risk factors. *S Afr Med J*  
49 2008;**98**:877–82.  
50  
51  
52  
53  
54 52 Viljoen D, Croxford J, Gossage JP, *et al.* Characteristics of Mothers of Children with Fetal  
55  
56  
57  
58  
59  
60

1  
2  
3 Alcohol Syndrome in the Western Cape Province of South Africa: A Case Control Study. *J*  
4  
5 *Stud Alcohol* 2002;**63**:6–17.  
6  
7

- 8 53 Viljoen DL, Gossage JP, Brooke L, *et al.* Fetal Alcohol Syndrome Epidemiology in a South  
9  
10 African Community : A Second Study of a Very High Prevalence Area. *J Stud Alcohol*  
11  
12 2005;**66**:593.  
13  
14  
15  
16  
17  
18  
19  
20  
21  
22  
23  
24  
25  
26  
27  
28  
29  
30  
31  
32  
33  
34  
35  
36  
37  
38  
39  
40  
41  
42  
43  
44  
45  
46  
47  
48  
49  
50  
51  
52  
53  
54  
55  
56  
57  
58  
59  
60

For peer review only



**Figure captions:**

Figure 1. Two examples of possible dose-response relationships between maternal alcohol consumption and probability of filial FASD.

Figure 2. Flow chart of publications measuring maternal behavior(s) related to FASD included in the review. Considerations during the inclusion and exclusion process can also be inspected at [https://osf.io/whq45/?view\\_only=6d5fddfeb71e493f999036753326c950](https://osf.io/whq45/?view_only=6d5fddfeb71e493f999036753326c950)

For peer review only

1  
2 **Table 1.** Overview of characteristics of included studies in this review

| Authors (year)                      | Geography     | Sample year | Cases                    | Controls | Assessment methods   | Number of measurement levels <sup>1</sup> |      |      |       | NOS score <sup>2</sup> |
|-------------------------------------|---------------|-------------|--------------------------|----------|----------------------|-------------------------------------------|------|------|-------|------------------------|
|                                     |               |             |                          |          |                      | Dich.                                     | Nom. | Ord. | Cont. |                        |
| <i>Cannon and colleagues</i> [9]    | United States | 1995-1997   | 353                      | 3894874  | record documentation | 1                                         |      | 2    |       | 4                      |
| <i>Ceccanti and colleagues</i> [36] | Italy         | 2014        | 39                       | 108      | interview            | 1                                         |      |      | 6     | 9                      |
| <i>Coyne and colleagues</i> [37]    | Australia     | 1994-2006   | 54                       | 56       | self-report          |                                           |      | 2    |       | 5                      |
| <i>Davies and colleagues</i> [38]   | South Africa  | 2002-2003   | 39                       | 36       | interview            |                                           | 1    |      |       | 6                      |
| <i>May and colleagues</i> [39]      | South Africa  |             | 46                       | 42       | interview            |                                           |      | 4    |       | 6                      |
| <i>May and colleagues</i> [40]      | South Africa  | 1999-2001   | 53                       | 116      | interview            |                                           |      | 4    |       | 7                      |
| <i>May and colleagues</i> [41]      | South Africa  |             | 61                       | 133      | interview            | 5                                         |      |      |       | 7                      |
| <i>May and colleagues</i> [42]      | South Africa  | 2002        | 49 FAS, 15 pFAS          | 133      | interview            | 1                                         |      | 4    | 7     | 6                      |
| <i>May and colleagues</i> [43]      | Italy         | 2011        | 8 FAS, 34 pFAS, 30 FASD  | 122      | interview            | 4                                         |      |      |       | 9                      |
| <i>May and colleagues</i> [44]      | South Africa  | 2013        | 63 FAS, 48 pFAS, 32 ARND | 81       | interview            | 4                                         |      |      |       | 7                      |

|    |                        |               |           |                          |        |             |   |   |   |
|----|------------------------|---------------|-----------|--------------------------|--------|-------------|---|---|---|
| 1  |                        |               |           |                          |        |             |   |   |   |
| 2  |                        |               |           |                          |        |             |   |   |   |
| 3  |                        |               |           |                          |        |             |   |   |   |
| 4  | <i>May and</i>         |               |           |                          |        |             |   |   |   |
| 5  | <i>colleagues</i> [45] | South Africa  | 2013      | 68 FAS, 52 pFAS, 35 ARND | 90     | interview   | 7 | 1 | 7 |
| 6  |                        |               |           |                          |        |             |   |   |   |
| 7  | <i>May and</i>         |               |           |                          |        |             |   |   |   |
| 8  | <i>colleagues</i> [46] | United States | 2010-2011 | 30                       |        | interview   | 2 | 4 | 7 |
| 9  |                        |               |           |                          |        |             |   |   |   |
| 10 | <i>May and</i>         |               |           |                          |        |             |   |   |   |
| 11 | <i>colleagues</i> [27] | South Africa  |           | 43                       |        | interview   | 5 |   | 7 |
| 12 |                        |               |           |                          |        |             |   |   |   |
| 13 | <i>Miller and</i>      |               |           |                          |        |             |   |   |   |
| 14 | <i>colleagues</i> [47] | United States | 1992-1994 | 22                       | 214499 | unknown     |   | 1 | 7 |
| 15 |                        |               |           |                          |        |             |   |   |   |
| 16 | <i>O'Leary and</i>     |               |           |                          |        |             |   |   |   |
| 17 | <i>colleagues</i> [48] | Australia     | 1995-1997 |                          |        | self-report |   | 3 | 6 |
| 18 |                        |               |           |                          |        |             |   |   |   |
| 19 | <i>Petković and</i>    |               |           |                          |        |             |   |   |   |
| 20 | <i>Barišić</i> [49]    | Croatia       |           | 55                       | 769    | self-report | 5 |   | 7 |
| 21 |                        |               |           |                          |        |             |   |   |   |
| 22 | <i>Suttie and</i>      |               |           |                          |        |             |   |   |   |
| 23 | <i>colleagues</i> [50] | South Africa  | 2013      | 22 FAS, 26 pFAS          | 69     | interview   |   | 3 | 5 |
| 24 |                        |               |           |                          |        |             |   |   |   |
| 25 | <i>Urban and</i>       |               |           |                          |        |             |   |   |   |
| 26 | <i>colleagues</i> [51] | South Africa  | 2001-2004 | 82                       | 74     | interview   | 1 |   | 6 |
| 27 |                        |               |           |                          |        |             |   |   |   |
| 28 | <i>Viljoen and</i>     |               |           |                          |        |             |   |   |   |
| 29 | <i>colleagues</i> [52] | South Africa  | 2001      | 31                       | 31     | interview   |   | 4 | 6 |
| 30 |                        |               |           |                          |        |             |   |   |   |
| 31 | <i>Viljoen and</i>     |               |           |                          |        |             |   |   |   |
| 32 | <i>colleagues</i> [53] | South Africa  | 2005      | 53                       | 116    | interview   | 5 |   | 7 |

33 note <sup>1</sup>measurements of maternal alcohol drinking behavior are categorized in three different levels: dichotomous ('Dich.', e.g., yes/no), nominal ('Nom.', e.g.,  
34 admitted, negative, unanswered), ordinal ('Ord.', e.g., < 4 drinks, > 4 drinks), continuous ('Cont.', e.g., %). The measures represent the different questions asked for  
35 each category (e.g., "drank during the first trimester of pregnancy"). <sup>2</sup>Each study was assessed using the adapted version of the Newcastle – Ottawa Scale (NOS).  
36 Scores were allocated from a scale from 0 (poor quality) to a maximum of 10 stars (excellent quality). For more detailed information see  
37 [https://osf.io/whq45/?view\\_only=6d5fddf71e493f999036753326c950](https://osf.io/whq45/?view_only=6d5fddf71e493f999036753326c950)  
38

39

40

41

42

43

44

45

46

47

**Table 2.** Conclusions made by authors of included studies on maternal drinking behaviors and FASD

| Authors (year)                      | Original authors' conclusions                                                                                                                                                                                                                                                                                                                                                                                                                     |
|-------------------------------------|---------------------------------------------------------------------------------------------------------------------------------------------------------------------------------------------------------------------------------------------------------------------------------------------------------------------------------------------------------------------------------------------------------------------------------------------------|
| <i>Cannon and colleagues</i> [9]    | "Mothers of children with FAS have severe substance abuse behaviors including daily drinking, binge drinking"                                                                                                                                                                                                                                                                                                                                     |
| <i>Ceccanti and colleagues</i> [36] | "Mothers of children with a FASD reported more drinking three months prior to pregnancy, more current drinking, and endorsed questionnaire items indicating that solitary drinking was more common"                                                                                                                                                                                                                                               |
| <i>Coyne and colleagues</i> [37]    | "Mothers of children with FAS reported heavy alcohol intake during pregnancy"                                                                                                                                                                                                                                                                                                                                                                     |
| <i>Davies and colleagues</i> [38]   | "Twenty five mothers with a FASD diagnosed child (69%) reported drinking alcohol, on average, every week during their pregnancy"                                                                                                                                                                                                                                                                                                                  |
| <i>May and colleagues</i> [39]      | "Most drinking is binge drinking. Even though the current drinking quantities reported by both subjects and controls were not high in absolute standards, the most important interpretation of the data is the large differential between subjects and controls. There is no doubt, however, that these mothers drank sufficiently to produce verifiable cases of fetal alcohol syndrome as severe as we have seen anywhere in the United States" |
| <i>May and colleagues</i> [40]      | "Alcohol consumption was much greater for case mothers than for control mothers in all comparisons. Control mothers were more likely to have been abstainers or Light drinkers compared with case mothers, who showed significantly heavier drinking patterns and reported drinking at the same level (53%-55%) or higher during pregnancy (32%-34%) compared with current drinking levels"                                                       |
| <i>May and colleagues</i> [41]      | "Measures of drinking during the index pregnancies are significantly associated with low intelligence and frequent behavioral problems in the children. Reported drinking during pregnancy (.59), drinks per day (.48), three drinks or more per occasion (.51), and five drinks or more per occasion (.45), correlate highly with total dysmorphism in the children"                                                                             |
| <i>May and colleagues</i> [42]      | "In most every variable of maternal alcohol use and abuse, a spectrum emerged based on the final diagnosis of the child with FAS, PFAS, and control. Alcohol use was greatest in quantity, frequency, and duration among the mothers of FAS children, and generally next most severe among mothers of PFAS children, while lowest among controls"                                                                                                 |
| <i>May and colleagues</i> [43]      | "Mothers of children with FASD report heavy current drinking and drinking during the 2nd and 3rd trimesters of the index pregnancy"                                                                                                                                                                                                                                                                                                               |
| <i>May and colleagues</i> [44]      | "Binge drinking of at least two days a week during all trimesters in this population may produce FAS or PFAS, while mothers of children with ARND and exposed children without an FASD are most likely to reduce their average and peak alcohol consumption in the later trimesters"                                                                                                                                                              |

|    |                                    |                                                                                       |
|----|------------------------------------|---------------------------------------------------------------------------------------|
| 1  |                                    |                                                                                       |
| 2  |                                    |                                                                                       |
| 3  |                                    |                                                                                       |
| 4  |                                    | "Mean number of drinks per week and drinking 3 and 5 or more drinks per occasion      |
| 5  |                                    | during pregnancy both illustrate the significant difference between mothers of        |
| 6  | <i>May and colleagues</i> [45]     | FASD children and those of normal children"                                           |
| 7  |                                    |                                                                                       |
| 8  |                                    | "Mothers of children who had a FASD reported more drinking 3 months before            |
| 9  | <i>May and colleagues</i> [46]     | pregnancy, and heavy drinking by the father of children who had FASD"                 |
| 10 |                                    | "With patterns of heavy episodic (binge) drinking being the most harmful to the       |
| 11 | <i>May and colleagues</i> [27]     | fetus"                                                                                |
| 12 |                                    |                                                                                       |
| 13 |                                    |                                                                                       |
| 14 | <i>Miller and colleagues</i> [47]  | "Mothers of FAS cases were more likely to drink alcohol during pregnancy"             |
| 15 |                                    |                                                                                       |
| 16 |                                    | "Heavy PAE in the first trimester was associated with a more than fourfold            |
| 17 |                                    | increased risk of ARBDs. This association was specific to PAE in the first trimester. |
| 18 |                                    | The finding of twofold increased odds of ARBDs after moderate levels of PAE during    |
| 19 | <i>O'Leary and</i>                 | late pregnancy is likely because many women also had heavy first trimester            |
| 20 | <i>colleagues</i> [48]             | exposure and reduced their alcohol intake as pregnancy progressed"                    |
| 21 |                                    |                                                                                       |
| 22 |                                    | "Confirmed pregnancy alcohol consumption in the FAS/PFAS group was higher             |
| 23 |                                    | (18.2%) to observed frequency in the whole sample of questioned mothers (11.5%)       |
| 24 | <i>Petković and Barišić</i> [49]   | and significantly higher when compared to non-FAS/PFAS mothers (10.4%)"               |
| 25 |                                    |                                                                                       |
| 26 |                                    |                                                                                       |
| 27 |                                    | "No differences were found for prenatal alcohol exposure between the HE               |
| 28 |                                    | subgroup with FAS/PFAS affinity (nonsyndromal heavy exposed with FAS/PFAS-like        |
| 29 |                                    | face signature [HE1]) versus the HE subgroup with control affinity (nonsyndromal      |
| 30 | <i>Suttie and colleagues</i> [50]  | heavy exposed with more control-like face signature [HE2]) (P < .10)"                 |
| 31 |                                    |                                                                                       |
| 32 |                                    | "Maternal drinking during pregnancy was much more frequently reported in              |
| 33 | <i>Urban and colleagues</i> [51]   | mothers of children with FAS/PFAS than in controls"                                   |
| 34 |                                    |                                                                                       |
| 35 |                                    | "Mothers of children with FAS drank significantly heavier than controls, especially   |
| 36 |                                    | for continues drinking heavily (and/or increasing) throughout pregnancy. Control      |
| 37 |                                    | mothers drank less and drinking levels declined during pregnancy. Episodic drinking   |
| 38 |                                    | on weekends was modal for both groups with bingeing 5+ drinks was normative           |
| 39 | <i>Viljoen and colleagues</i> [52] | during 2 constructive days for FAS mothers "                                          |
| 40 |                                    |                                                                                       |
| 41 |                                    | "Mothers of children with FAS drink more than controls, drink rapidly and drink       |
| 42 |                                    | heavily in an episodic fashion. Moreover, they do not quit or cut down during         |
| 43 | <i>Viljoen and colleagues</i> [53] | pregnancy"                                                                            |
| 44 |                                    |                                                                                       |

Note For more detailed information see [https://osf.io/whq45/?view\\_only=6d5fddfeb71e493f999036753326c950](https://osf.io/whq45/?view_only=6d5fddfeb71e493f999036753326c950)

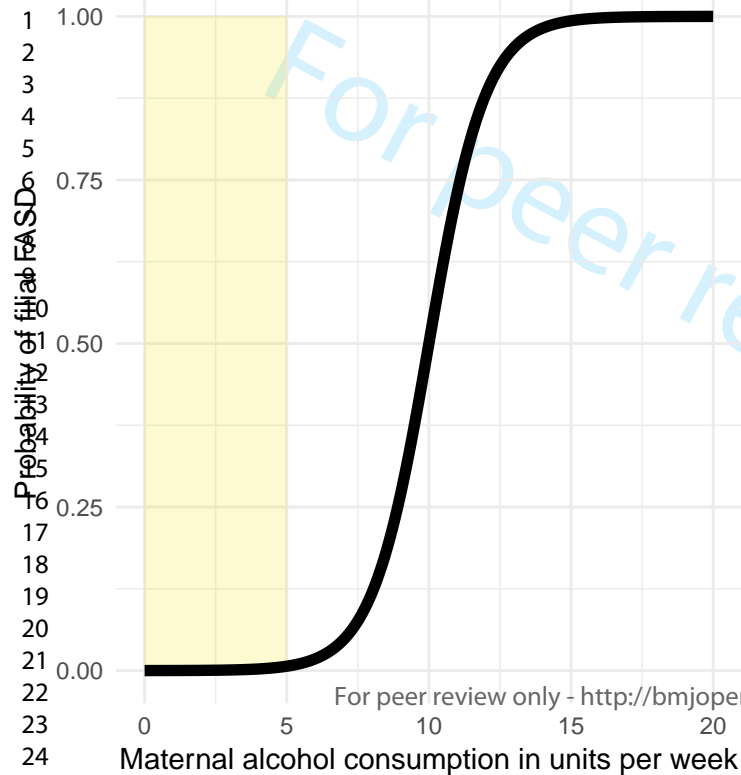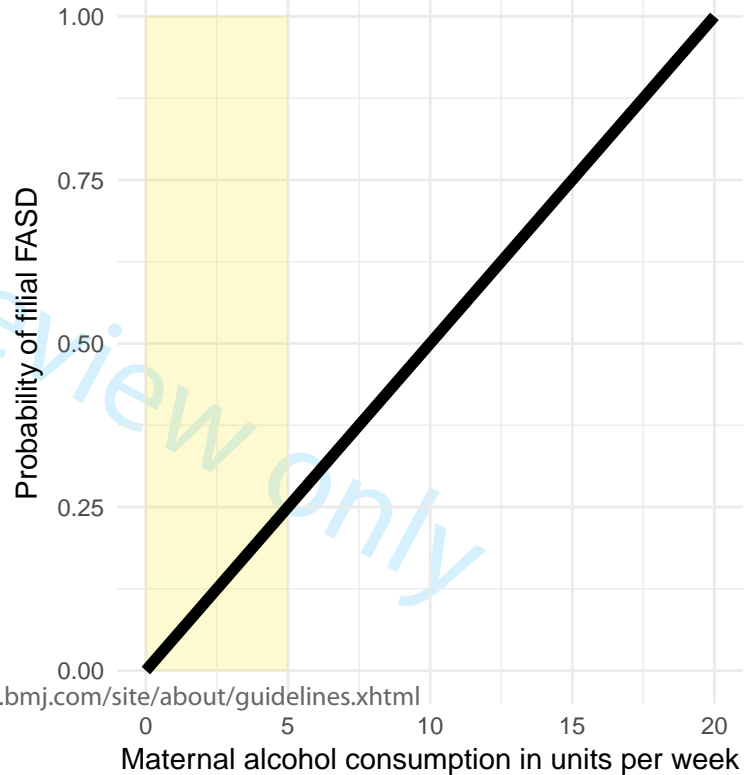

Records identified by query in bibliographic databases  
(n = 3.047)

- Records excluded based on:
- Duplicates (n = 539)
  - Screening titles (n = 1.924)
  - Screening titles and abstracts (n = 385)
  - Screening full text (n = 183)
  - Extraction (n = 10)
  - Extraction (n = 1)

Inspection of inclusions in other review  
(n = 4)

Included after screening  
(n = 20)

Re-ran query  
(n = 0)

Total number of publications included in the  
systematic literature review  
(n = 20)

1  
2  
3  
4  
5  
6  
7  
8  
9  
10  
11  
12  
13  
14  
15  
16  
17  
18  
19  
20  
21  
22  
23  
24  
25  
26  
27  
28  
29  
30  
31  
32  
33  
34  
35  
36  
37  
38  
39  
40  
41  
42

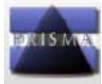

# PRISMA 2009 Checklist

| Section/topic                      | #  | Checklist item                                                                                                                                                                                                                                                                                              | Reported on page # |
|------------------------------------|----|-------------------------------------------------------------------------------------------------------------------------------------------------------------------------------------------------------------------------------------------------------------------------------------------------------------|--------------------|
| <b>TITLE</b>                       |    |                                                                                                                                                                                                                                                                                                             |                    |
| Title                              | 1  | Identify the report as a systematic review, meta-analysis, or both.                                                                                                                                                                                                                                         | 1                  |
| <b>ABSTRACT</b>                    |    |                                                                                                                                                                                                                                                                                                             |                    |
| Structured summary                 | 2  | Provide a structured summary including, as applicable: background; objectives; data sources; study eligibility criteria, participants, and interventions; study appraisal and synthesis methods; results; limitations; conclusions and implications of key findings; systematic review registration number. | 2                  |
| <b>INTRODUCTION</b>                |    |                                                                                                                                                                                                                                                                                                             |                    |
| Rationale                          | 3  | Describe the rationale for the review in the context of what is already known.                                                                                                                                                                                                                              | 4-5                |
| Objectives                         | 4  | Provide an explicit statement of questions being addressed with reference to participants, interventions, comparisons, outcomes, and study design (PICOS).                                                                                                                                                  | 5                  |
| <b>METHODS</b>                     |    |                                                                                                                                                                                                                                                                                                             |                    |
| Protocol and registration          | 5  | Indicate if a review protocol exists, if and where it can be accessed (e.g., Web address), and, if available, provide registration information including registration number.                                                                                                                               | NA                 |
| Eligibility criteria               | 6  | Specify study characteristics (e.g., PICOS, length of follow-up) and report characteristics (e.g., years considered, language, publication status) used as criteria for eligibility, giving rationale.                                                                                                      | 5-6                |
| Information sources                | 7  | Describe all information sources (e.g., databases with dates of coverage, contact with study authors to identify additional studies) in the search and date last searched.                                                                                                                                  | 5-6                |
| Search                             | 8  | Present full electronic search strategy for at least one database, including any limits used, such that it could be repeated.                                                                                                                                                                               | 5                  |
| Study selection                    | 9  | State the process for selecting studies (i.e., screening, eligibility, included in systematic review, and, if applicable, included in the meta-analysis).                                                                                                                                                   | 5-6                |
| Data collection process            | 10 | Describe method of data extraction from reports (e.g., piloted forms, independently, in duplicate) and any processes for obtaining and confirming data from investigators.                                                                                                                                  | 5-6                |
| Data items                         | 11 | List and define all variables for which data were sought (e.g., PICOS, funding sources) and any assumptions and simplifications made.                                                                                                                                                                       | 6                  |
| Risk of bias in individual studies | 12 | Describe methods used for assessing risk of bias of individual studies (including specification of whether this was done at the study or outcome level), and how this information is to be used in any data synthesis.                                                                                      | NA                 |
| Summary measures                   | 13 | State the principal summary measures (e.g., risk ratio, difference in means).                                                                                                                                                                                                                               | 6                  |
| Synthesis of results               | 14 | Describe the methods of handling data and combining results of studies, if done, including measures of consistency (e.g., $I^2$ ) for each meta-analysis.                                                                                                                                                   | 6                  |



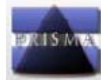

# PRISMA 2009 Checklist

| Section/topic                 | #  | Checklist item                                                                                                                                                                                           | Reported on page # |
|-------------------------------|----|----------------------------------------------------------------------------------------------------------------------------------------------------------------------------------------------------------|--------------------|
| Risk of bias across studies   | 15 | Specify any assessment of risk of bias that may affect the cumulative evidence (e.g., publication bias, selective reporting within studies).                                                             | NA                 |
| Additional analyses           | 16 | Describe methods of additional analyses (e.g., sensitivity or subgroup analyses, meta-regression), if done, indicating which were pre-specified.                                                         | 6                  |
| <b>RESULTS</b>                |    |                                                                                                                                                                                                          |                    |
| Study selection               | 17 | Give numbers of studies screened, assessed for eligibility, and included in the review, with reasons for exclusions at each stage, ideally with a flow diagram.                                          | 7                  |
| Study characteristics         | 18 | For each study, present characteristics for which data were extracted (e.g., study size, PICOS, follow-up period) and provide the citations.                                                             | 7                  |
| Risk of bias within studies   | 19 | Present data on risk of bias of each study and, if available, any outcome level assessment (see item 12).                                                                                                | NA                 |
| Results of individual studies | 20 | For all outcomes considered (benefits or harms), present, for each study: (a) simple summary data for each intervention group (b) effect estimates and confidence intervals, ideally with a forest plot. | 7-9                |
| Synthesis of results          | 21 | Present results of each meta-analysis done, including confidence intervals and measures of consistency.                                                                                                  | 7-9                |
| Risk of bias across studies   | 22 | Present results of any assessment of risk of bias across studies (see Item 15).                                                                                                                          | NA                 |
| Additional analysis           | 23 | Give results of additional analyses, if done (e.g., sensitivity or subgroup analyses, meta-regression [see Item 16]).                                                                                    | 7-9                |
| <b>DISCUSSION</b>             |    |                                                                                                                                                                                                          |                    |
| Summary of evidence           | 24 | Summarize the main findings including the strength of evidence for each main outcome; consider their relevance to key groups (e.g., healthcare providers, users, and policy makers).                     | 10                 |
| Limitations                   | 25 | Discuss limitations at study and outcome level (e.g., risk of bias), and at review-level (e.g., incomplete retrieval of identified research, reporting bias).                                            | 10                 |
| Conclusions                   | 26 | Provide a general interpretation of the results in the context of other evidence, and implications for future research.                                                                                  | 10-12              |
| <b>FUNDING</b>                |    |                                                                                                                                                                                                          |                    |
| Funding                       | 27 | Describe sources of funding for the systematic review and other support (e.g., supply of data); role of funders for the systematic review.                                                               | 15                 |

From: Moher D, Liberati A, Tetzlaff J, Altman DG, The PRISMA Group (2009). Preferred Reporting Items for Systematic Reviews and Meta-Analyses: The PRISMA Statement. PLoS Med 6(6): e1000097. doi:10.1371/journal.pmed1000097

For more information, visit: [www.prisma-statement.org](http://www.prisma-statement.org).

# BMJ Open

## Systematic literature review on which maternal alcohol behaviors are related to Fetal Alcohol Spectrum Disorders (FASD).

|                                 |                                                                                                                                                                                                                                                                                                                                                                                                                                                                                                                                                                                                                                                                                                                                                                                                                                                                                                                                                                                                                                   |
|---------------------------------|-----------------------------------------------------------------------------------------------------------------------------------------------------------------------------------------------------------------------------------------------------------------------------------------------------------------------------------------------------------------------------------------------------------------------------------------------------------------------------------------------------------------------------------------------------------------------------------------------------------------------------------------------------------------------------------------------------------------------------------------------------------------------------------------------------------------------------------------------------------------------------------------------------------------------------------------------------------------------------------------------------------------------------------|
| Journal:                        | <i>BMJ Open</i>                                                                                                                                                                                                                                                                                                                                                                                                                                                                                                                                                                                                                                                                                                                                                                                                                                                                                                                                                                                                                   |
| Manuscript ID                   | bmjopen-2018-022578.R1                                                                                                                                                                                                                                                                                                                                                                                                                                                                                                                                                                                                                                                                                                                                                                                                                                                                                                                                                                                                            |
| Article Type:                   | Research                                                                                                                                                                                                                                                                                                                                                                                                                                                                                                                                                                                                                                                                                                                                                                                                                                                                                                                                                                                                                          |
| Date Submitted by the Author:   | 29-Aug-2018                                                                                                                                                                                                                                                                                                                                                                                                                                                                                                                                                                                                                                                                                                                                                                                                                                                                                                                                                                                                                       |
| Complete List of Authors:       | Roozen, Sylvia; Governor Kremers Centre, Maastricht University Medical Centre; Maastricht University, Department of Work and Social Psychology<br>Peters, Gjalb-Jorn; Open University, Faculty of Psychology and Education Science; Maastricht University, Work and Social Psychology<br>Kok, Gerjo; Governor Kremers Centre, Maastricht University Medical Centre; Maastricht University, Department of Work and Social Psychology<br>Townend, David; Governor Kremers Centre, Maastricht University Medical Centre; Maastricht University, Department of Health, Ethics & Society<br>Nijhuis, Jan; Governor Kremers Centre, Maastricht University Medical Centre; Maastricht University Medical Centre, Department of Obstetrics & Gynaecology<br>Koek, Ger; Governor Kremers Centre, Maastricht University Medical Centre; Maastricht University Medical Centre, Department of Internal Medicine, Division of Gastroenterology and Hepatology<br>Curfs, Leopold; Governor Kremers Centre, Maastricht University Medical Centre |
| <b>Primary Subject Heading</b>: | Public health                                                                                                                                                                                                                                                                                                                                                                                                                                                                                                                                                                                                                                                                                                                                                                                                                                                                                                                                                                                                                     |
| Secondary Subject Heading:      | Global health, Public health                                                                                                                                                                                                                                                                                                                                                                                                                                                                                                                                                                                                                                                                                                                                                                                                                                                                                                                                                                                                      |
| Keywords:                       | Prenatal diagnosis < OBSTETRICS, Substance misuse < PSYCHIATRY, PREVENTIVE MEDICINE                                                                                                                                                                                                                                                                                                                                                                                                                                                                                                                                                                                                                                                                                                                                                                                                                                                                                                                                               |
|                                 |                                                                                                                                                                                                                                                                                                                                                                                                                                                                                                                                                                                                                                                                                                                                                                                                                                                                                                                                                                                                                                   |

SCHOLARONE™  
Manuscripts

# Systematic literature review on which maternal alcohol behaviors are related to Fetal Alcohol Spectrum Disorders (FASD).

Sylvia Roozen<sup>1,2</sup>

sylvia.roozen@maastrichtuniversity.nl

<sup>1</sup> Governor Kremers Centre, Maastricht University Medical Centre, PO Box 5800, 6202 AZ Maastricht, the Netherlands

<sup>2</sup> Department of Work and Social Psychology, Maastricht University, PO Box 616, 6200 MD Maastricht, the Netherlands

Gjalt-Jorn Y. Peters<sup>2,3</sup>

gjalt-jorn@behaviorchange.eu

<sup>2</sup> Department of Work and Social Psychology, Maastricht University, PO Box 616, 6200 MD Maastricht, the Netherlands

<sup>3</sup> Faculty of Psychology and Education Science, Open University of The Netherlands, PO Box 2960, 6401 DL Heerlen, the Netherlands

Gerjo Kok<sup>1,2</sup>

g.kok@maastrichtuniversity.nl

<sup>1</sup> Governor Kremers Centre, Maastricht University Medical Centre, PO Box 5800, 6202 AZ Maastricht, the Netherlands

<sup>2</sup> Department of Work and Social Psychology, Maastricht University, PO Box 616, 6200 MD Maastricht, the Netherlands

David Townend<sup>1,4</sup>

d.townend@maastrichtuniversity.nl

<sup>1</sup> Governor Kremers Centre, Maastricht University Medical Centre, PO Box 5800, 6202 AZ Maastricht, the Netherlands

<sup>4</sup> Department of Health, Ethics & Society, Maastricht University, PO Box 616, 6200 MD Maastricht, the Netherlands

1  
2  
3  
4  
5 Jan Nijhuis<sup>1,5</sup>

6 jg.nijhuis@mumc.nl  
7  
8

9 <sup>1</sup> Governor Kremers Centre, Maastricht University Medical Centre, PO Box 5800, 6202 AZ Maastricht, the  
10 Netherlands  
11

12 <sup>5</sup> Department of Obstetrics & Gynaecology, Maastricht University Medical Centre, PO Box 5800, 6202 AZ  
13 Maastricht, the Netherlands  
14  
15

16  
17 Ger Koek<sup>1,6</sup>

18 gh.koek@mumc.nl  
19  
20

21  
22 <sup>1</sup> Governor Kremers Centre, Maastricht University Medical Centre, PO Box 5800, 6202 AZ Maastricht, the  
23 Netherlands  
24

25 <sup>6</sup> Department of Internal Medicine, Division of Gastroenterology and Hepatology, Maastricht University  
26 Medical Centre, PO Box 5800, 6202 AZ Maastricht, the Netherlands  
27  
28  
29

30 Leopold Curfs<sup>1</sup>

31 leopold.curfs@maastrichtuniversity.nl  
32  
33

34 <sup>1</sup> Governor Kremers Centre, Maastricht University Medical Centre, PO Box 5800, 6202 AZ Maastricht, the  
35 Netherlands  
36  
37  
38

39 **Correspondence to:**  
40

41 Sylvia Roozen

42 Maastricht University

43 Governor Kremers Centre

44 PO Box 616, 6200 MD Maastricht, The Netherlands

45 Phone: +31 (0)43-3884108

46 Email: sylvia.roozen@maastrichtuniversity  
47  
48  
49  
50  
51  
52  
53  
54  
55  
56  
57  
58  
59  
60

1  
2  
3  
4  
5  
6  
7  
8  
9  
10  
11  
12  
13  
14  
15  
16  
17  
18  
19  
20  
21  
22  
23  
24  
25  
26  
27  
28  
29  
30  
31  
32  
33  
34  
35  
36  
37  
38  
39  
40  
41  
42  
43  
44  
45  
46  
47  
48  
49  
50  
51  
52  
53  
54  
55  
56  
57  
58  
59  
60

**Key Words:**

Prenatal diagnosis; substance misuse; preventive medicine

**Word Count 5,087**

For peer review only

## Abstract

**Objectives:** Fetal Alcohol Spectrum Disorders (FASD) is a worldwide problem. Maternal alcohol consumption is an important risk factor for FASD. It remains unknown which alcohol consumption patterns most strongly predict FASD. The objective of this study was to identify these.

**Design:** Systematic literature review.

**Methods:** We searched in PubMed, PsychINFO, PsycARTICLES, ERIC, CINAHL, EMBASE and MEDLINE up to August 2018. The query consisted of keywords and their synonyms related to FASD, pregnancy, and behavior. Studies were excluded when not published in English, were reviews, or involved non-human subjects. Substantial heterogeneity precluded aggregation or meta-analysis of the data. Instead, data were qualitatively inspected.

**Results:** In total, 21 studies were eligible for further data analysis. All studies that measured both maternal alcohol drinking behaviors and FASD reported retrospective data on maternal drinking patterns, employing both continuous and categorical measures and exhibiting substantial heterogeneity in measures of alcohol consumption (e.g., timing of exposure, quantification of alcohol measure, definition of a standard drink). Study quality improved over time and appeared higher for studies based on active case ascertainment, especially when conducted in schools, and when behavior was assessed through interviews.

**Conclusions:** We aimed to identify specific maternal drinking behavior(s) related to FASD. The state of the literature precludes such conclusions. Evidence-based preventive measures necessitate identifying

1  
2  
3 which prenatal alcohol drinking behavior(s) are most in need of intervention. Therefore, we formulate  
4  
5 three recommendations for future research. First, future studies can optimize the value of the collected  
6  
7 dataset through specifying measurements and reporting of maternal drinking behaviors, and avoiding  
8  
9 categorized measures (nominal or ordinal) whenever possible. Second, samples should not be selected  
10  
11 based on FASD status, but instead, FASD status as well as maternal alcohol consumption should both be  
12  
13 measured in a general population sample. Finally, we provide ten reporting guidelines for FASD research.  
14  
15  
16  
17  
18  
19

### 20 **Strengths and limitations of this study**

- 21  
22  
23 • This systematic literature review uses a comprehensive search strategy to cover the published  
24  
25 literature
- 26  
27 • We did not consult grey literature
- 28  
29 • Consultation about data aggregation took place with three independent alcohol experts
- 30  
31 • Substantial heterogeneity prevented synthesis but yielded a rich set of recommendations as to  
32  
33 reporting guidelines and measurement principles  
34  
35  
36  
37  
38  
39  
40  
41  
42  
43  
44  
45  
46  
47  
48  
49  
50  
51  
52  
53  
54  
55  
56  
57  
58  
59  
60

## Introduction

Prenatal alcohol exposure is one of the leading causes of mental retardation resulting in irreversible lifelong consequences for the unborn child (e.g., neurocognitive deficits, growth deficiencies, facial dysmorphism) [1]. These adverse outcomes are also known as fetal alcohol spectrum disorders (FASD).

The spectrum encompasses various diagnostic subtypes: fetal alcohol syndrome (FAS), partial fetal alcohol syndrome (pFAS), alcohol related neurodevelopmental disorder (ARND), alcohol related birth defects (ARBD), and neurobehavioral disorder with prenatal alcohol exposure (ND-PAE) [1,2].

Epidemiological research implies that FASD is a worldwide problem. Initial FAS prevalence estimates ranged from 0.5 to 7 per 1,000 livebirths [3,4]. Recent systematic literature reviews [5,6] including multiple meta-analyses reported estimates ranging from 0.11 to 55.42 per 1,000 (FAS), 0.8 to 43.01 per 1,000 (pFAS), 0.12 to 20.25 per 1,000 (ARND), 1.03 to 10.82 per 1,000 (ARBD), and 1.06 to 113.22 per 1,000 (FASD).

FASD, as its name implies, is caused by alcohol use. Several reviews have aimed to further elucidate the relationship between alcohol use and filial FASD [7,8]. Specifically, mothers of children diagnosed in the FASD spectrum reported drinking levels ranging from mild to excessive ('binge drinking') alcohol use [7,9–11] [8,12,13]. The severity of FASD may be dependent on the level, pattern, and timing of prenatal alcohol exposure before and during pregnancy [13,14], along with other confounding factors such as nutritional status of the mother (e.g. vitamin or mineral intake), environmental factors (e.g., social relationships, stress), maternal age, and genetic makeup [14–16]. As yet, there is no known safe amount of alcohol to drink while pregnant [1,13,17,18].



1  
2  
3 Two systematic literature reviews reported associations between level of alcohol exposure and negative  
4 effects on child development [7,11]. Both reviews show the negative effects of higher amounts of alcohol  
5 intake (daily alcohol consumption up to 4 or more drinks per occasion before and during pregnancy)  
6 related to various neuropsychological outcomes (including but not specific for a FASD diagnosis).  
7  
8 However, these reviews are inconclusive about behaviors related to the outcome of FASD specifically  
9  
10 [5,7,11], or the effects of consumption of lower amounts of alcohol.  
11  
12  
13  
14  
15

16  
17  
18 Planning evidence based health promoting programs requires an adequate understanding of which  
19 maternal behavior(s) are associated with FASD. Note that maternal alcohol consumption is not the only  
20 factor for filial FASD. Paternal and even grandparental consumption patterns have also been implicated  
21 [19,20], but as yet it remains undecided whether paternal and grandparental consumption should also  
22 be included in the FASD definition (effects of paternal and grandparental consumption are considered  
23 necessarily either genetic or through influencing maternal alcohol consumption, whereas maternal  
24 alcohol consumption has a direct teratogenic effect). However, for the sake of this review, we limited  
25 ourselves to maternal alcohol consumption. Specifically, a first step for designing prevention programs  
26 requires defining specific target behavior(s) of the target population related to FASD [6,21]. However, the  
27 literature remains inconclusive about which maternal drinking behaviors are related to alterations of the  
28 fetal development. Despite this conflicting and inconclusive evidence of the negative effects on the  
29 developing fetus, public health recommendations are made nonetheless. These recommendations share  
30 one common principle, namely that complete abstinence of alcohol use during pregnancy is the safest  
31 approach to prevent any possible risks to the unborn child [1,13,17,18]. However, despite this common  
32 thread, there are also many differences between the recommendations. For example, the British Medical  
33 Association (BMA) lists four different recommendations that are currently made in the United Kingdom  
34 alone [13]. This heterogeneity is problematic because communicating multiple contrasting  
35  
36  
37  
38  
39  
40  
41  
42  
43  
44  
45  
46  
47  
48  
49  
50  
51  
52  
53  
54  
55  
56  
57  
58  
59  
60

1  
2  
3 recommendations is confusing for the target audiences. At the same time, there are good arguments to  
4  
5 tailor the recommendations. For example, it is likely that although any alcohol consumption may entail  
6  
7 risks, binge drinking (BAC to .08 grams percent or above; 4 or more drinks in about 2 hours) is one of the  
8  
9 serious risk factors and associated with severe forms of FASD [22]. Therefore, it appears that special  
10  
11 attention for specific risk groups such as heavily drinking pregnant women is warranted.  
12  
13  
14  
15

16  
17 Yet, implementing such a tailored approach is currently hindered by the lack of knowledge regarding the  
18  
19 dose-response relationship and potential moderators. On the one hand, insufficient evidence is available  
20  
21 about the association of different alcohol-related behaviors to FASD-related risk, especially low doses of  
22  
23 alcohol, to adequately delineate target groups to enable tailored communication. This would seem to  
24  
25 justify foregoing the heterogeneous recommendations and instead converging on an abstinence  
26  
27 recommendation. However, in some target populations, such a total abstinence recommendation does  
28  
29 not seem feasible. Especially high-risk populations, for example heavily drinking women, may not be able  
30  
31 to completely eliminate their alcohol intake, for example because of personal factors as self-regulation  
32  
33 skills, or environmental factors such as social pressures. Given that a total abstinence recommendation  
34  
35 may be unrealistic for some of the highest-risk populations, such a recommendation can be ethically  
36  
37 problematic.  
38  
39  
40  
41  
42

---

43 Figure 1 about here

---

44  
45  
46  
47 To illustrate this, consider Figure 1. This Figure shows two potential dose-response relationships between  
48  
49 weekly maternal alcohol consumption and risk of filial FASD for a given individual (note that individual  
50  
51 vulnerabilities can vary). The left panel shows a sigmoid relationship, where risk remains low if less than  
52  
53 five units are consumed weekly, whereas in the linear dose-response relationship depicted in the right  
54  
55  
56  
57  
58  
59  
60

1  
2  
3 panel, risk is already considerable at five consumptions weekly. For those subpopulations where  
4  
5 abstinence recommendations may be unrealistic, if the dose-response relationship is similar to that  
6  
7 shown in the left panel, a harm reduction message such as 'consume at most five units' (the yellow areas  
8  
9 in Figure 1) may be easier to defend than if the dose-response relationship is linear. Not only may such a  
10  
11 message be easier to defend: it may be more effective at decreasing FASD prevalence. Setting  
12  
13 unachievable goals has little behavior change potential [23], and if a more achievable goal can stimulate  
14  
15 the target population to moderate their alcohol intake enough to decrease the risk of FASD, while an  
16  
17 abstinence message, being unrealistic, has no effect, the ethics of an abstinence message become  
18  
19 questionable. If, however, the risk increases very rapidly even with light alcohol consumption, deviating  
20  
21 from an abstinence message may be damaging.  
22  
23  
24  
25  
26  
27

28 Animal models have provided some evidence as to potential dose-response relationships. However, such  
29  
30 models are not fully translatable to humans [16], and especially given that the present research question  
31  
32 concerns not simply whether a dose-response relationship exists, but what the *nature* of this relationship  
33  
34 is, relying on animal models does not seem appropriate.  
35  
36  
37  
38

39 Further research is warranted to identify behaviors for health promotion programs to target on.

40  
41 Developing health promoting programs aiming at reducing alcohol consumption during pregnancy first  
42  
43 requires identifying which prenatal alcohol drinking behavior(s) are most in need of intervention. The  
44  
45 purpose of the present study is to conduct a systematic literature review and meta-analysis to identify  
46  
47 those maternal alcohol drinking behaviors most strongly related to FASD.  
48  
49  
50  
51  
52  
53  
54  
55  
56  
57  
58  
59  
60

## Materials and Methods

### *Protocol and data repository*

Data will be reported following the PRISMA guideline [24]. All materials and supporting documents are publicly available at the Open Science Framework repository at

[https://osf.io/whq45/?view\\_only=6d5fddfeb71e493f999036753326c950](https://osf.io/whq45/?view_only=6d5fddfeb71e493f999036753326c950) (NOTE TO REVIEWERS, EDITOR

AND TYPESETTERS: THIS WILL BE REPLACED WITH THE PUBLIC, NON-ANONYMIZED URL ON

ACCEPTANCE). In this repository, we have numbered the directories that organize the materials.

Hereafter, we will refer to materials in this repository as “resource 1” through “resource 8”, which correspond to these directories.

### *Ethics statement and patient and public involvement*

The current study extracted data from online databases and did not involve participation of participants; therefore, it was not necessary to obtain ethical permission.

### *Search strategy*

A search was conducted in PubMed, PsychINFO, PsychARTICLES, ERIC, CINAHL, EMBASE and MEDLINE databases up to August 2015 using an extensive query consisting of keywords related to FASD, pregnancy and behavior (e.g., fetal alcohol syndrome, pregnancy, alcohol use, risk factor). We reran the query just before submitting the manuscript in August 2018 and performed a cursory inspection to scan for newly added papers. Moreover, we applied the ascendancy approach by inspecting the reference lists of included articles (the complete queries are included in resource 1).

### *Study selection*

Resulting hits from the query were exported and screened by two independent screeners in three rounds. The first screening round was based on titles only; the second, on titles and abstracts; and the third, on the full text articles. Records were included if they were written in English and reported maternal alcohol related behaviors associated with a FASD diagnosis. Records that were duplicates, concerned reviews or meta-analysis, or concerned studies that involved non-human subjects were excluded. An extensive list of inclusion and exclusion criteria is located in the screening instructions (resource 2).

### *Data extraction*

Data were transferred onto extraction forms, which were templated source code files for R [25], using Notepad++. Researcher SR completed all extraction forms including the following variables: sampling method (retrospective versus prospective), sampling selection (select versus aselect), variables on which controls were matched (e.g., age mother, study year of the child), recruitment setting (e.g., school, clinic), descent (native versus nonnative population), geography, year of data collection, sample size, subsamples, method of diagnosis (e.g., IOM, 4-digit), syndrome category (e.g., FAS, ARND), datatype (e.g., aggregate, question), datatype levels (e.g., nominal, logical), confirmed maternal alcohol exposure, method of case ascertainment (active versus passive), data collection method (self-report versus interview). Moreover, variables related to drinking behaviors were extracted. Specifically, period of alcohol consumption (e.g., first trimester, before pregnancy), timeframe (concurrent versus retrospective), intensity specification (e.g., any day, weekend day), specification of units (e.g., oz, mg), specification of timeframe (e.g., per year, per month), bingeing, and alcoholism. Also, when no indication of one standard drink was provided, the units in grams were granted depending on country and their

1  
2  
3 national alcohol guidelines (e.g., one standard drink in the United States = 14 gr, Australia = 10 gr; see  
4  
5 resource 5). These extraction forms were then read into R and processed by an R script.  
6  
7

### 8 9 10 *Quality assessment*

11 A slightly adapted ) version of the Newcastle–Ottawa Scale (NOS) was used for assessing the quality of  
12  
13 nonrandomized studies for further meta-analysis with a maximum of 10 stars [26] (see resource 4 for the  
14  
15 complete assessment and comparison to the original version) The quality of each publication was  
16  
17 assessed by two independent reviewers (inter rater reliability = 80%) who settled differences by  
18  
19 discussion.. No studies were excluded based on this quality assessment.  
20  
21  
22  
23  
24

### 25 *Data synthesis and statistical analysis*

26  
27 In case of sufficient homogeneity, meta-analyses and meta-regressions were to be conducted using  
28  
29 metafor, a free package in R [27].  
30  
31  
32  
33  
34

---

35 Figure 2 About Here

---

## 38 39 40 **Results**

41  
42  
43 The systematic literature review resulted in 3404 identified hits (see Figure 2). Twenty-one hits qualified  
44  
45 for further screening and analysis. Hits were excluded because they were duplicates, not written in  
46  
47 English, or did not report associations between prenatal alcohol and FASD. The assessment of the  
48  
49 included studies using the NOS scale revealed a wide range of quality scores with an average score of  
50  
51 6.57 out of 10 (for more details, see resource 5).  
52  
53  
54  
55  
56  
57  
58  
59  
60

### *Sample characteristics*

Sample characteristics can be inspected in Table 1. First, inspection of the data shows that the included studies were reported from five different countries, including Australia ( $n = 2$ ), Croatia ( $n = 1$ ), Italy ( $n = 2$ ), South Africa ( $n = 12$ ), and United States ( $n = 4$ ). All studies were conducted after the year 1992.

Almost all studies relied on interviews ( $n = 17$ ), followed by self-reports ( $n = 3$ ), and medical records ( $n = 1$ ). Moreover, all studies were based on a retrospective sampling method. Behavior was described in terms of maternal alcohol drinking related to a FASD diagnosis. Behaviors were reported before and during pregnancy where the period during pregnancy was specified per trimester (e.g., first, second, third).

Further inspection shows that alcohol consumption was operationalized differently in each study (e.g., dichotomous measures; a complete table can be found in Table 1): in fact, no two studies used the same measure. Some studies reported units, whereas other studies reported subjective estimates (e.g., many, less than). Others used dichotomous measures (e.g., yes or no), a mixture of ordinal measures (e.g., none, mild, moderate, heavy), or interval variables (e.g., percentage). The original author's conclusions on maternal drinking behaviors & FASD can be inspected in Table 2.

### *Dichotomous measures*

Dichotomous measures (e.g., yes versus no) were available for 12 studies representing 44 measures (see Table 1). These included questions concerning alcohol consumption before pregnancy [7, 10, 11, 20].

Questions concerning alcohol consumption during pregnancy [2, 8, 14] included the following variables: binge drinking without specifying how this was defined [2, 8], alcoholism [1], binge drinking (3 or more drinks per occasion; 5 or more drinks per occasion) [9, 10, 12, 13, 14], alcohol consumption in general [7, 9, 11, 17, 19], smoking as well as binge drinking (3 or more drinks per occasion; 5 or more drinks per occasion [13]). Moreover, questions were measured if pregnant women drank alcohol during the first

1  
2  
3 trimester of pregnancy [7, 9, 11, 13, 14, 17, 21]; second trimester [7, 9, 11, 13, 14, 17, 21]; and/ or third  
4  
5 trimester [7, 9, 11, 13, 14, 17, 21]. For more detailed information see resource 5.  
6  
7

### 8 *Nominal measures*

9

10  
11 Although alcohol consumption is in fact a continuous variable, it was still operationalized at the nominal  
12  
13 level in six nominal measures used in two studies [4, 17]. For more detailed information see resource 5.  
14  
15

### 16 *Ordinal measures*

17

18  
19 In total, 24 ordinal measures were used in eight studies (see also the numbered studies in Table 1). These  
20  
21 incorporated questions concerning alcohol consumption before pregnancy [3], sometimes specified in  
22  
23 categories of units e.g., grams a week, stopped during drinking or drank less than current use [3, 5, 6, 8,  
24  
25 20]; and alcohol consumption during pregnancy [1], including variables measuring the categories of  
26  
27 alcohol intake in units of e.g., grams a week [3, 15]. Moreover, questions were measured for each  
28  
29 trimester of pregnancy; alcohol consumption during first trimester of pregnancy [5, 8, 20] whereby  
30  
31 variables were specified with categories e.g., drank less or drank more than current use [5, 8, 20]; alcohol  
32  
33 consumption during second trimester [5, 6, 8, 20] using the categories e.g., drank less or drank more  
34  
35 than current use [5, 6, 8, 20]; and alcohol consumption during the third trimester [5, 6, 8, 20] whereby  
36  
37 variables were specified with categories e.g., drank less or drank more than current use [5, 6, 8, 20]. For  
38  
39 more detailed information see resource 5.  
40  
41  
42  
43  
44

### 45 *Continuous measures*

46

47  
48 Surprisingly, continuous measures were only available for six studies. In total, these studies employed 29  
49  
50 measures (see Table 1). These included questions concerning alcohol consumption before pregnancy [2,  
51  
52 8, 10, 12, 18] where variables were sometimes specified in number of drinks e.g., a day or week [8, 10,  
53  
54 14]; and during pregnancy [10, 14], where variables were sometimes specified in number of drinks e.g.,  
55  
56  
57  
58  
59  
60



1  
2  
3 during a drinking day, week, weekend [2, 11, 12, 14, 18]. Moreover, number of alcoholic drinks or  
4  
5 drinking days were measured during the first trimester of pregnancy [2, 10, 12, 14], sometimes specified  
6  
7 in numbers a day or estimated BAC [8]; number of drinks or drinking days during second trimester [2, 10,  
8  
9 12, 14], sometimes specified in numbers a day or estimated BAC [8]; and/ or number of drinks or  
10  
11 drinking days during third trimester [2, 10, 12, 14], sometimes specified in numbers a day or estimated  
12  
13 BAC [8].  
14  
15

---

16  
17 Table 1 About Here  
18  
19

---

20  
21  
22  
23  
24  
25  
26 Table 2 About Here  
27  
28

### 29 *Integration*

30  
31  
32 Categorical variables were based on different answer options and cut-off values, which precluded further  
33  
34 aggregation or integration. Operationalizations on a continuous level of measurement also displayed  
35  
36 substantial variation. Where possible, we attempted to transform these continuous measures of alcohol  
37  
38 consumption into the same metric (e.g., one standard drink defined in grams). However, even this was  
39  
40 hindered by heterogeneity in reported standard sizes (sometimes not reported at all), types of alcohol  
41  
42 described, and other variation across countries. Moreover, few studies reported continuous data.  
43  
44 Because of these reasons, conducting meta-analyses of the continuous variables alone was not feasible.  
45  
46  
47  
48

49 Consultation with three independent alcohol experts (e.g., expertise in pharmacology of alcohol and  
50  
51 measurements of alcohol drinking behaviors) revealed that aggregation of variables in the current  
52  
53 dataset was not feasible. This substantial heterogeneity in operationalizations hindered further meta-  
54  
55  
56  
57  
58  
59  
60

1  
2  
3 analyses, and therefore the data will be described qualitatively below with emphasis on the used  
4 operationalizations and timing of exposure.  
5  
6

7  
8 Because aggregation of the evidence was not possible, we instead sought to explore the heterogeneity  
9 exhibited by the included studies (note that all 230 extracted effect sizes are available in file  
10 'effectsizes.csv', and an overview of the used operationalisations in 'Alcohol use variables.csv', both in  
11 resource 6). Given the small number of included studies, we decided to inspect visualizations of the  
12 associations between study characteristics. We plotted the quality of the studies (NOS scores), study  
13 year, measurement level of the alcohol consumption operationalization, recruitment setting, and data  
14 collection methods.  
15  
16  
17  
18  
19  
20  
21  
22  
23

24  
25 These visualizations revealed interesting patterns. The quality of studies (NOS score) seem to improve  
26 over the years. Data derived from clinical records were mainly based on ordinal measures. NOS score  
27 appeared higher for studies where maternal alcohol history was based on interviews. Finally, NOS scores  
28 appeared higher for samples recruited through active case ascertainment, especially in schools. We have  
29 included these visualizations in resource 6).  
30  
31  
32  
33  
34  
35

36  
37 The wide range of variation in operationalisations provided a unique opportunity to compare them.  
38  
39 Continuous measures provide detailed information about specific units (e.g., oz, standard drink, BAC). If  
40 reported similarly across studies, these could be further meta-analyzed. However, this requires reporting  
41 all information needed to convert the reported statistics into grams or milliliters of alcohol, to enable  
42 integration with results from other countries. Other challenges appear to be present for logical, nominal  
43 and ordinal measures (e.g., cut-off scores). Some studies reported categories e.g., binge drinking  
44 including 3 or more drinks per occasion versus 5 or more drinks per occasion [28]; less than 4 drinks a  
45 day versus more than 4 drinks a day [9]. None of the studies reported a description and considerations of  
46 why certain cut-off scores were chosen. Cut-off scores likely often followed recommendations by health  
47  
48  
49  
50  
51  
52  
53  
54  
55  
56  
57  
58  
59  
60

1  
2  
3 promotion agencies or suggestions from earlier studies, but without explicit specification this remains  
4  
5 unclear. Perhaps the difficulty of establishing sensible cut-off values partly explains this, as doing so  
6  
7 requires evidence syntheses to determine where exactly the effects of the relevant behavior becomes  
8  
9 qualitatively different. Such evidence (e.g., meta-analyses of maternal alcohol consumption patterns) is  
10  
11 not yet available. However, this should lead researchers to employ continuous operationalisations for  
12  
13 now, rather than selecting (more or less arbitrary) cut-off scores.  
14  
15

## 16 17 18 19 20 **Discussion** 21

22  
23  
24 In this systematic literature review, we aimed to summarize available data of studies that reported  
25  
26 maternal alcohol drinking behaviors in relation to FASD. Data were available for 21 studies. The majority  
27  
28 of these 20 studies were based on retrospective self-reports or interviews. A substantial heterogeneity in  
29  
30 the applied measures for alcohol consumption was observed. Studies were based on continuous and  
31  
32 categorical measures (dichotomous, nominal, and ordinal). Continuous measures included blood alcohol  
33  
34 content, percentages of drinking days, and alcohol consumption in grams or ounces. Categorical  
35  
36 measures employed a variety of cut-offs to distinguish the different categories. This heterogeneity was  
37  
38 so substantial that it precluded meta-analyses. Therefore, it was not possible to answer the original  
39  
40 research question: the extant literature does not enable any conclusions as to the relationship between  
41  
42 maternal alcohol consumption and the likelihood of infants developing FASD. Instead, however, a wealth  
43  
44 of suggestions for future research was distilled from the literature.  
45  
46  
47

48  
49 The most striking finding was the variation in measurement instruments that were employed to assess  
50  
51 maternal drinking behavior. Each of the 20 included studies operationalized measures of alcohol  
52  
53 consumption differently. The majority of studies used categorical measures. This is not desirable as these  
54  
55  
56  
57  
58  
59

1  
2  
3 impose a discontinuous scale using cut-off scores. Because, as this review evidences, there exists  
4  
5 insufficient evidence to derive whether alcohol consumption (as relating to FASD risk) should be  
6  
7 considered as a continuous or discontinuous scale, and where the cut-offs should lie in the case of a  
8  
9 discontinuous scale, such cut-off scores are necessarily arbitrary to a degree. In addition, categorizing  
10  
11 continuous data discards variance, thereby potentially obfuscating associations between variables [29–  
12  
13 31]. The variation in cut-off scores exhibited in the studies included in this review supports this  
14  
15 assumption of arbitrariness, and prohibits aggregation of the data collected in those studies. When  
16  
17 studies did use continuous measures, studies often did not report how many grams of alcohol were in  
18  
19 one standard drink. By making assumptions (e.g., based on the standard drink size in the country of data  
20  
21 collection) we were able to convert most standard drink-based measures into grams of alcohol, but this  
22  
23 was not always feasible.  
24  
25  
26

### 27 28 *Strengths and limitations* 29

30  
31 One of the reasons for this heterogeneity may be that none of the included studies were conducted  
32  
33 primarily to investigate the association between maternal drinking behavior and FASD: although both  
34  
35 variables were frequently measured and reported, most studies were designed to determine prevalence  
36  
37 or FASD symptoms. It appears that few or no studies have been designed specifically to empirically  
38  
39 establish how maternal alcohol consumption in humans is related to the likelihood of FASD. Given the  
40  
41 comprehensive set up of this literature review, it is unlikely that such attempts have been overlooked.  
42  
43 The search query was very extensive, rendering omission of relevant keywords unlikely. Screening was  
44  
45 conducted in three screening rounds, by two independent screeners, and all records flagged for inclusion  
46  
47 by one screener were retained for closer inspection. In addition, the ascendancy approach was applied.  
48  
49 Given that reports of studies where these variables were secondary measures preclude conclusions  
50  
51 about this relationship, it is as yet not possible to establish which recommendations can be empirically  
52  
53  
54  
55  
56  
57  
58  
59  
60

1  
2  
3 justified. In other words, even though in some target populations a total abstinence recommendation  
4  
5 does not seem feasible. Available literature as yet offers no clear guidance that enables exploring a  
6  
7 recommendation that could balance feasibility for the target population with dangers to health. Also  
8  
9 Mamluk et al. [32] underlined the lack of data to make robust conclusions on the harmful effects of  
10  
11 prenatal alcohol exposure and the unborn child. However, our inspection of the literature did yield a  
12  
13 number of valuable recommendations for future research.  
14  
15

### 16 17 *Recommendations* 18

19  
20 The original aim of this review was to provide a first step on the road to theory- and evidence-based  
21  
22 intervention development. We had hoped that after identifying the risk related to different behavioral  
23  
24 patterns, we could provide guidelines for prevention workers working with different target populations  
25  
26 (e.g. alcohol-dependent pregnant women or teenage mothers). The next step could then be to map the  
27  
28 determinants of those behaviors in those populations (i.e. why individuals engage in the relevant  
29  
30 undesirable and desirable behaviors)[33]; so that these can be targeted by behavior change principles  
31  
32 [34] that are then integrated into prevention campaigns [35]. However, it seems that the literature as yet  
33  
34 has little guidance to offer. Because designing effective interventions first and foremost requires a  
35  
36 thorough understanding of the target behavior(s), it is therefore important that future research  
37  
38 considers the limitations identified in this review so that in the future, a clearer picture may emerge.  
39  
40  
41

42  
43 The first recommendation is addressed specifically to epidemiological researchers, and is based on the  
44  
45 observation that the majority of studies assessed maternal drinking as part of a prevalence study.  
46  
47 Because these studies form the largest part of the available data regarding associations between  
48  
49 maternal alcohol consumption and FASD outcomes it is important to pay close attention to the  
50  
51 measurement of alcohol consumption, even in epidemiological studies with different primary aims.  
52  
53  
54  
55  
56  
57  
58  
59  
60

1  
2  
3 Second, in general, researchers should anticipate the need to aggregate their measures of alcohol  
4 consumption with measures from other studies: in other words, conversion to consumption in metric  
5 units, such as grams of alcohol, in a specified time period such as week or month, should be possible. If  
6 such conversion cannot be performed, the study cannot contribute to an accumulation of evidence. For  
7 example, many studies did not specify what exactly constituted a unit of alcohol (i.e. one standard drink).  
8 This means that it was necessary to try and identify the definition of a unit of alcohol in the country  
9 where the data were collected, in the period where the data were collected, but even then the obtained  
10 definition was unreliable as sometimes researchers conduct studies away from their home country yet  
11 use their home countries' unit definitions when reporting the results. Another example is that if timing of  
12 exposure was not specified, it is not clear whether the behavior occurred during the first, second, or  
13 third trimester (or was an aggregate of those periods).  
14  
15  
16  
17  
18  
19  
20  
21  
22  
23  
24  
25  
26  
27

28 This recommendation translates into a number of specific suggestions. Most of these are covered by  
29 following guidelines for the measurement of alcohol consumption, such as those specified by Dawson  
30 [36] and Sobell and Sobell [37], but specifically, it is recommended that future studies assessing specific  
31 maternal drinking behaviors should report at least the following (see below for the recommended  
32 approach in each case):  
33  
34  
35  
36  
37  
38  
39

- 40 (i) how the sample was selected (e.g., retrospective) and which method was used (e.g.,  
41 convenience sampling method),  
42
- 43 (ii) the maternal characteristics variables (e.g., age, descent, educational level),  
44
- 45 (iii) which method (or specific questions) was used to assess maternal alcohol consumption (e.g.,  
46 alcohol timeline follow back approach),  
47  
48
- 49 (iv) the timing of exposure when assessing maternal alcohol consumption (e.g., first trimester  
50 pregnancy),  
51  
52  
53  
54  
55  
56  
57  
58  
59  
60

- (v) the frequency of exposure when assessing maternal alcohol consumption (e.g., number of exposure sessions per week or month),
- (vi) the amount of alcohol consumed per exposure session [36],
- (vii) the sample size,
- (viii) what was considered as one standard drink using International System of Units (i.e. grams or milliliters of alcohol),
- (ix) if discontinuous (categorical) measures cannot be avoided, clear justification of the employed cut-offs.

The third recommendation refers to the complexity of exploring the association between maternal alcohol consumption and filial FASD. One cannot recruit children with FASD and then proceed to select children without FASD. This is not helpful because the *number* of children without FASD but with parents with matched alcohol consumption patterns is the variable of interest. The proportion of children with FASD within each group of parents with a given alcohol consumption pattern is the dependent variable to measure. For example, let us assume that in the left panel of Figure 1 (showing the sigmoid relationship), the probability of FASD is 1% if alcohol consumption is lower than 5 units; 25% if alcohol consumption is between 5 and 10 units; 75% if alcohol consumption is between 10 and 15 units; and 99% if alcohol consumption exceeds 15 units. Similarly, let us assume that in the right panel (showing the linear relationship), the probability of FASD is 12.5% if alcohol consumption is lower than 5 units; 37.5% if alcohol consumption is between 5 and 10 units; 62.5% if alcohol consumption is between 10 and 15 units; and 87.5% if alcohol consumption exceeds 15 units. This means that for 1000 parents consuming between 0 and 5 units (the yellow area), in the sigmoid scenario, 10 children will develop FASD and 990 (99 times more) will not, while in the linear scenario, 125 children develop FASD and 875 will not (7 times more). Now, imagine that a researcher visits a school and screens all children for FASD, and 10 children

1  
2  
3 screen positive for FASD. For simplicity's sake, let us assume that the parents of all these children  
4  
5 happened to consume less than 5 units per week during pregnancy. Now, this researcher will not know  
6  
7 whether to create a matched control group that is 99 times larger (as would be the case in the sigmoid  
8  
9 scenario) or 7 times larger (as would be the case in the linear scenario). It is exactly the relative sizes of  
10  
11 these groups that is the variable to measure, and the only way to do so is to measure both maternal  
12  
13 alcohol consumption patterns and filial FASD in a large sample.  
14  
15

16  
17 Based on these recommendations, the ideal design would be a large-scale<sup>1</sup> prospective study where  
18  
19 maternal and paternal alcohol consumption patterns would be assessed both using self-reports (conform  
20  
21 the recommendations made earlier) as well as objective measures such as biomarkers for alcohol  
22  
23 consumption [38]. Infants would then be assessed for FASD according to the revised IOM guidelines [1]  
24  
25 and other recommendations provided by Roozen et al. [6], and the FASD prevalence would be related to  
26  
27 alcohol consumption patterns of both parents separate and in conjunction. This design also enables  
28  
29 examination of potential confounders such as social economic status or age. Such an ideal design may  
30  
31 not always be feasible. After all, learning about the association of parental drinking patterns to filial FASD  
32  
33 requires assessing drinking patterns in all pregnancies: it is not possible to start from identified FASD  
34  
35 cases, as we explained earlier. However, even when other designs are utilized, it is important that  
36  
37 researchers anticipate data aggregation over studies, and therefore attempt to provide alcohol measures  
38  
39 in metric units.  
40  
41  
42  
43  
44

45 The present review focused on reported data on maternal drinking behaviors. Some of the included  
46  
47 studies also reported paternal drinking patterns or grandparental drinking patterns. The role of paternal  
48  
49

---

50  
51 <sup>1</sup> Note that what constitutes "large-scale" depends on the expected FASD prevalence in a population as well as the  
52  
53 target behavior under investigation, e.g. abstinence versus moderated drinking, or abstinence versus regular  
54  
55 drinking patterns. These two parameters determine the effect size of the association that is to be estimated, which  
56  
57 in turn enables computation of the required sample size for accurate estimation of that effect size using Accuracy in  
58  
59 Parameter Estimation (AIPE) methods.  
60



1  
2  
3 drinking and transgenerational toxicity on fetal development and FASD is not well understood. A recent  
4  
5 review study by Gupta and colleagues [19] reported that paternal alcoholism alters the gene expression  
6  
7 for fetal susceptibility to FAS. In another review, Resendiz and colleagues [20] argue that  
8  
9 transgenerational toxicity may play a role in FASD etiology. Moreover, social facilitation by paternal  
10  
11 drinking is significantly associated with maternal drinking [39]. The origin of FASD is therefore not only  
12  
13 based on maternal drinking behaviors but by many other factors (e.g., genetic and epigenetic  
14  
15 predisposition, maternal body makeup, and lifestyle). Gupta and colleagues [19] emphasized that FAS  
16  
17 etiology, and also other diagnosis within the FASD spectrum, is based on a complex interaction of  
18  
19 different factors whereby cautious interpretation is warranted.  
20  
21  
22  
23  
24

## 25 **Conclusion**

26  
27  
28  
29 The current knowledge on maternal alcohol drinking behaviors in relation to FASD is limited. Behaviors  
30  
31 were measured using various techniques and operationalized differently. For evidence-based preventive  
32  
33 measures it is necessary to identify which prenatal alcohol drinking behavior(s) are most in need of  
34  
35 intervention. Several recommendations have been made that can facilitate accumulation of evidence  
36  
37 over studies. Following these recommendations can contribute to establishing the evidence base  
38  
39 required for the development of effective preventive health promoting programs.  
40  
41  
42  
43  
44  
45  
46  
47  
48  
49  
50  
51  
52  
53  
54  
55  
56  
57  
58  
59  
60

### Contributors

Authors SR, GJYP, GK, LC designed the study and directed its implementation, including quality assurance and control. Authors DT, JN, and GK helped supervising the field activities. Authors SR and GJYP conducted the literature review and analyses and prepared the Materials and Methods and the Discussion sections of the text. All other co-authors contributed to successive drafts. All authors gave significant input in preparation of the article and approved the manuscript and submission.

### Availability of data and materials

All data, analysis scripts, and other materials are publicly available at the Open Science Framework repository for this study ([https://osf.io/whq45/?view\\_only=6d5fddfeb71e493f999036753326c950](https://osf.io/whq45/?view_only=6d5fddfeb71e493f999036753326c950)).

## References

- 1 Hoyme, H.E., Kalberg, W.O., Elliott, A.J., Blankenship, J., Buckley, D., Marais, A.S., Manning, M.A., Robinson, L.K., Adam, M.P., Abdul-Rahman, O. and Jewett T. Updated Clinical Guidelines for Diagnosing Fetal Alcohol Spectrum Disorders. *Pediatrics* 2016;**138**.
- 2 American Psychiatric Association. *Diagnostic and statistical manual of mental disorders (DSM-5)*. Washington DC: 2013.
- 3 BMA Board of Science. *Fetal alcohol spectrum disorders A guide for healthcare professionals Fetal alcohol spectrum disorders A guide for healthcare professionals*. British Medical Association 2007.
- 4 May P a, Gossage JP, Kalberg WO, *et al*. Prevalence and epidemiologic characteristics of FASD from various research methods with an emphasis on recent in-school studies. *Dev Disabil Res Rev* 2009;**15**:176–92. doi:10.1002/ddrr.68
- 5 Popova S, Lange S, Probst C, *et al*. Estimation of national, regional, and global prevalence of alcohol use during pregnancy and fetal alcohol syndrome: a systematic review and meta-analysis. *Lancet Glob Heal* 2017;:1–10. doi:10.1016/S2214-109X(17)30021-9
- 6 Roozen S, Peters G-JY, Kok G, *et al*. Worldwide Prevalence of Fetal Alcohol Spectrum Disorders: A Systematic Literature Review Including Meta-Analysis. *Alcohol Clin Exp Res* 2016;**40**:18–32. doi:10.1111/acer.12939
- 7 Esper LH, Furtado EF. Identifying maternal risk factors associated with Fetal Alcohol Spectrum Disorders: a systematic review. *Eur Child Adolesc Psychiatry* Published Online First: 2014. doi:10.1007/s00787-014-0603-2
- 8 May PA, Tabachnick BG, Gossage JP, *et al*. Maternal risk factors predicting child physical

- 1  
2  
3 characteristics and dysmorphology in fetal alcohol syndrome and partial fetal alcohol  
4  
5 syndrome. *Drug Alcohol Depend* 2011;**119**:18–27. doi:10.1016/j.drugalcdep.2011.05.009  
6  
7  
8 9 Cannon MJ, Dominique Y, O’Leary L a, *et al*. Characteristics and behaviors of mothers who  
9  
10 have a child with fetal alcohol syndrome. *Neurotoxicol Teratol* 2012;**34**:90–5.  
11  
12 doi:10.1016/j.ntt.2011.09.010  
13  
14  
15 10 Henderson J, Gray R, Brocklehurst P. Systematic review of effects of low-moderate  
16  
17 prenatal alcohol exposure on pregnancy outcome. *BJOG An Int J Obstet Gynaecol*  
18  
19 2007;**114**:243–52. doi:10.1111/j.1471-0528.2006.01163.x  
20  
21  
22 11 Flak AL, Su S, Bertrand J, *et al*. The association of mild, moderate, and binge prenatal  
23  
24 alcohol exposure and child neuropsychological outcomes: a meta-analysis. *Alcohol Clin*  
25  
26 *Exp Res* 2014;**38**:214–26. doi:10.1111/acer.12214  
27  
28  
29 12 Davis P, Partridge J, Storrs C. Alcohol consumption in pregnancy. How much is safe? *Arch*  
30  
31 *Dis Child* 1982;**28**:940–3.  
32  
33  
34 13 BMA Board of Science. Alcohol and pregnancy Preventing and managing fetal alcohol  
35  
36 spectrum disorders. 2016.  
37  
38  
39 14 Sullivan EV, Pfefferbaum A. Fetal alcohol spectrum disorder: pathogenesis and  
40  
41 mechanisms. *Alcohol Nerv Syst Handb Clin Neurol* 2014;**125**.  
42  
43  
44 15 Ramsay M. Genetic and epigenetic insights into fetal alcohol spectrum disorders. *Genome*  
45  
46 *Med* 2010;**2**:27. doi:10.1186/gm148  
47  
48  
49 16 Ehrhart F, Roozen S, Verbeek J, *et al*. Review and gap analysis : molecular pathways  
50  
51 leading to fetal alcohol spectrum disorders. *Mol Psychiatry* Published Online First: 2018.  
52  
53  
54 doi:10.1038/s41380-018-0095-4  
55  
56  
57  
58  
59  
60

- 1  
2  
3 17 Jonsson E, Salmon A, Warren KR. The international charter on prevention of fetal alcohol  
4 spectrum disorder. *Lancet Glob Heal* 2014;**2**:e135-7. doi:10.1016/S2214-109X(13)70173-6  
5  
6  
7  
8 18 WHO. Guidelines for the identification and management of substance use and substance  
9 use disorders in pregnancy. Geneva: 2014.  
10  
11  
12  
13 19 Gupta KK, Gupta VK, Shirasaka T. An Update on Fetal Alcohol Syndrome - Pathogenesis,  
14 Risks, and Treatment. *Alcohol Clin Exp Res* 2016;**40**:1594–602. doi:10.1111/acer.13135  
15  
16  
17  
18 20 Resendiz M, Chen Y, Öztürk NC, *et al.* Epigenetic medicine and fetal alcohol spectrum  
19 disorders Marisol. *Epigenomics* 2013;**5**:73–86. doi:10.2217/epi.12.80.Epigenetic  
20 disorders  
21  
22  
23 21 Kok G, Gottlieb NH, Peters GY, *et al.* A taxonomy of behavior change methods: an  
24 Intervention Mapping approach. *Health Psychol Rev* 2016;**10**:297–312.  
25  
26  
27  
28  
29  
30 22 May PA, Gossage JP. Maternal Risk Factors for Fetal Alcohol Spectrum Disorders: Not As  
31 Simple As It Might Seem. *Alcohol Res Heal* 2011;**34**:15–26.  
32  
33  
34  
35 23 Strecher VJ, Seijts GH, Kok GJ, *et al.* Goal Setting as a Strategy for Health Behavior Change.  
36  
37  
38  
39  
40 24 Moher D, Liberati A, Tetzlaff J, *et al.* Preferred reporting items for systematic reviews and  
41 meta-analyses: the PRISMA statement. *Ann Intern Med* 2009;**151**:264–9.  
42  
43  
44  
45  
46  
47 25 R Development Core Team. R: A Language and Environment for Statistical Computing.  
48  
49  
50  
51  
52 26 Wells GA, Shea B, O’Connell D, *et al.* The Newcastle-Ottawa Scale (NOS) for assessing the  
53  
54  
55  
56  
57  
58  
59  
60

- 1  
2  
3 27 Viechtbauer W. Conducting Meta-Analyses in R with the metafor package. *J Stat Softw*  
4  
5 2010;**36**:1–48.  
6  
7  
8 28 May P a, Hamrick KJ, Corbin KD, *et al.* Dietary Intake, Nutrition, and Fetal Alcohol  
9  
10 Spectrum Disorders in the Western Cape Province of South Africa. *Reprod Toxicol*  
11  
12 Published Online First: February 2014. doi:10.1016/j.reprotox.2014.02.002  
13  
14  
15 29 DeCoster J, Iselin A-MR, Gallucci M. A conceptual and empirical examination of  
16  
17 justifications for dichotomization. *Psychol Methods* 2009;**14**:349–66.  
18  
19 doi:10.1037/a0016956  
20  
21  
22 30 MacCallum RC, Zhang S, Preacher KJ, *et al.* On the practice of dichotomization of  
23  
24 quantitative variables. *Psychol Methods* 2002;**7**:19–40. doi:10.1037//1082-989X.7.1.19  
25  
26  
27 31 Altman DG, Royston P. The cost of dichotomising continuous variables. *BMJ*  
28  
29 2006;**332**:1080. doi:10.1136/bmj.332.7549.1080  
30  
31  
32 32 Mamluk L, Edwards HB, Savovic J, *et al.* Low alcohol consumption and pregnancy and  
33  
34 childhood outcomes: time to change guidelines indicating apparently ‘safe’ levels of  
35  
36 alcohol during pregnancy? A systematic review and meta-analyses. *BMJ Open*  
37  
38 2017;**7**:e015410. doi:10.1136/bmjopen-2016-015410  
39  
40  
41  
42 33 Peters G-JY, Crutzen R. Establishing determinant importance using CIBER: an introduction  
43  
44 and tutorial. *Eur Heal Psychol* 2018;**20**.  
45  
46  
47 34 Crutzen R, Peters G-JY-G-JY. Evolutionary learning processes as the foundation for  
48  
49 behaviour change. *Health Psychol Rev* 2018;**12**:43–57.  
50  
51 doi:10.1080/17437199.2017.1362569  
52  
53  
54 35 Roozen S, Black D, Peters G-JY, *et al.* Fetal Alcohol Spectrum Disorders (FASD): an  
55  
56  
57  
58  
59  
60

1  
2  
3 Approach to Effective Prevention. *Curr Dev Disord Reports* 2016;;10–5.

4  
5 doi:10.1007/s40474-016-0101-y

6  
7  
8 36 Dawson DA. Methodological issues in measuring alcohol use. *Alcohol Res Heal*  
9  
10 2003;**27**:18–29.

11  
12 37 Sobell LC, Sobell MB. Alcohol consumption measures. In: *Assessing alcohol problems: A*  
13  
14 *guide for clinicians and researchers*. 1995. 75–99.

15  
16 38 Chabenne A, Moon C, Ojo C, *et al*. Biomarkers in fetal alcohol syndrome. *Biomarkers*  
17  
18 *Genomic Med* 2014;**6**:12–22. doi:10.1016/j.bgm.2014.01.002

19  
20 39 McBride N, Johnson S. Fathers' Role in Alcohol-Exposed Pregnancies. Systematic Review  
21  
22 of Human Studies. *Am J Prev Med* 2016;;1–9. doi:10.1016/j.amepre.2016.02.009

23  
24 40 Ceccanti M, Fiorentino D, Coriale G, *et al*. Maternal risk factors for fetal alcohol spectrum  
25  
26 disorders in a province in Italy. *Drug Alcohol Depend* 2014;**145**:201–8.

27  
28 doi:10.1016/j.drugalcdep.2014.10.017

29  
30 41 Coyne KL, de Costa CM, Heazlewood RJ, *et al*. Pregnancy characteristics of women giving  
31  
32 birth to children with fetal alcohol syndrome in Far North Queensland. *Aust N Z J Obstet*  
33  
34 *Gynaecol* 2008;**48**:240–7. doi:10.1111/j.1479-828X.2008.00861.x

35  
36 42 Davies L, Dunn M, Chersich M, *et al*. Developmental delay of infants and young children  
37  
38 with and without fetal alcohol spectrum disorder in the Northern Cape Province, South  
39  
40 Africa. *African J Psychiatry (South Africa)* 2011;**14**:298–305. doi:10.4314/ajpsy.v14i4.7

41  
42 43 May PA, Brooke L, Gossage JP, *et al*. Epidemiology of fetal alcohol syndrome in a South  
43  
44 African community in the Western Cape Province. *Am J Public Health* 2000;**90**:1905–12.

45  
46 doi:10.2105/ajph.90.12.1905

- 1  
2  
3 44 May PA, Gossage JP, Brooke LE, *et al.* Maternal risk factors for fetal alcohol syndrome in  
4 the Western Cape Province of South Africa: A population-based study. *Am J Public Health*  
5 2005;**95**:1190–9. doi:10.2105/AJPH.2003.037093  
6  
7  
8  
9  
10 45 May P a, Gossage JP, Marais A-S, *et al.* The epidemiology of fetal alcohol syndrome and  
11 partial FAS in a South African community. *Drug Alcohol Depend* 2007;**88**:259–71.  
12 doi:10.1016/j.drugalcdep.2006.11.007  
13  
14  
15  
16  
17 46 May PA, Gossage JP, Marais A-S, *et al.* Maternal risk factors for fetal alcohol syndrome  
18 and partial fetal alcohol syndrome in South Africa: a third study. *Alcohol Clin Exp Res*  
19 2008;**32**:738–53. doi:10.1111/j.1530-0277.2008.00634.x  
20  
21  
22  
23  
24  
25 47 May P a, Fiorentino D, Coriale G, *et al.* Prevalence of children with severe fetal alcohol  
26 spectrum disorders in communities near Rome, Italy: new estimated rates are higher than  
27 previous estimates. *Int J Environ Res Public Health* 2011;**8**:2331–51.  
28 doi:10.3390/ijerph8062331  
29  
30  
31  
32  
33  
34  
35 48 May PA, Blankenship J, Marais AS, *et al.* Maternal alcohol consumption producing fetal  
36 alcohol spectrum disorders (FASD): Quantity, frequency, and timing of drinking. *Drug*  
37 *Alcohol Depend* 2013;**133**:502–12. doi:10.1016/j.drugalcdep.2013.07.013  
38  
39  
40  
41  
42 49 May PA, Blankenship J, Marais AS, *et al.* Approaching the Prevalence of the Full Spectrum  
43 of Fetal Alcohol Spectrum Disorders in a South African Population-Based Study. *Alcohol*  
44 *Clin Exp Res* 2013;**37**:818–30. doi:10.1111/acer.12033  
45  
46  
47  
48  
49 50 May P a, Baete A, Russo J, *et al.* Prevalence and characteristics of fetal alcohol spectrum  
50 disorders. *Pediatrics* 2014;**134**:855–66. doi:10.1542/peds.2013-3319  
51  
52  
53  
54 51 May P, De Vries M, Marais A-S, *et al.* Replication of High Fetal Alcohol Spectrum Disorders  
55  
56  
57  
58  
59  
60



- 1  
2  
3 Prevalence Rates, Child Characteristics, and Maternal Risk Factors in a Second Sample of  
4 Rural Communities in South Africa. *Int J Environ Res Public Health* 2017;**14**:522.  
5  
6 doi:10.3390/ijerph14050522  
7  
8  
9  
10 52 Miller LA, Shaikh T, Stanton C, *et al.* Surveillance for fetal alcohol syndrome in Colorado.  
11  
12 *Public Heal Rep* 1995;**110**:690–7.  
13  
14  
15 53 O’Leary CM, Nassar N, Kurinczuk JJ, *et al.* Prenatal alcohol exposure and risk of birth  
16  
17 defects. *Pediatrics* 2010;**126**:e843-50. doi:10.1542/peds.2010-0256  
18  
19  
20 54 Petković G, Barišić I. Prevalence of fetal alcohol syndrome and maternal characteristics in  
21  
22 a sample of schoolchildren from a rural province of Croatia. *Int J Environ Res Public Health*  
23  
24 2013;**10**:1547–61. doi:10.3390/ijerph10041547  
25  
26  
27 55 Suttie M, Foroud T, Wetherill L, *et al.* Facial Dysmorphism Across the Fetal Alcohol  
28  
29 Spectrum. *Pediatrics* 2013;**131**:788. doi:peds.2012-1371 [pii]\r10.1542/peds.2012-1371  
30  
31  
32 56 Urban M, Chersich MF, Fourie L-A, *et al.* Fetal alcohol syndrome among grade 1  
33  
34 schoolchildren in Northern Cape Province: prevalence and risk factors. *S Afr Med J*  
35  
36 2008;**98**:877–82.  
37  
38  
39 57 Viljoen D, Croxford J, Gossage JP, *et al.* Characteristics of Mothers of Children with Fetal  
40  
41 Alcohol Syndrome in the Western Cape Province of South Africa: A Case Control Study. *J*  
42  
43 *Stud Alcohol* 2002;**63**:6–17.  
44  
45  
46  
47 58 Viljoen DL, Gossage JP, Brooke L, *et al.* Fetal Alcohol Syndrome Epidemiology in a South  
48  
49 African Community : A Second Study of a Very High Prevalence Area. *J Stud Alcohol*  
50  
51 2005;**66**:593.  
52  
53  
54  
55  
56  
57  
58  
59  
60

1  
2  
3  
4  
5  
6  
7  
8  
9  
10  
11  
12  
13  
14  
15  
16  
17  
18  
19  
20  
21  
22  
23  
24  
25  
26  
27  
28  
29  
30  
31  
32  
33  
34  
35  
36  
37  
38  
39  
40  
41  
42  
43  
44  
45  
46  
47  
48  
49  
50  
51  
52  
53  
54  
55  
56  
57  
58  
59  
60

For peer review only

1  
2  
3 **Figure captions:**  
4

5 Figure 1. Two examples of possible dose-response relationships between maternal alcohol consumption  
6 and probability of filial FASD.  
7

8  
9 Figure 2. Flow chart of publications measuring maternal behavior(s) related to FASD included in the  
10 review. Details regarding the screening procedure and number of exclusions per exclusion criterion can  
11 be inspected at resource 2.  
12  
13  
14  
15  
16  
17  
18  
19  
20  
21  
22  
23  
24  
25  
26  
27  
28  
29  
30  
31  
32  
33  
34  
35  
36  
37  
38  
39  
40  
41  
42  
43  
44  
45  
46  
47  
48  
49  
50  
51  
52  
53  
54  
55  
56  
57  
58  
59  
60

For peer review only

1  
2 **Table 1.** Overview of characteristics of included studies in this review

| 3              | 4                                   | 5             | 6         | 7                        | 8                  | 9                                         | 10   |      |       |                        | 11 |    |    |    |
|----------------|-------------------------------------|---------------|-----------|--------------------------|--------------------|-------------------------------------------|------|------|-------|------------------------|----|----|----|----|
|                |                                     |               |           |                          |                    |                                           | 12   | 13   | 14    | 15                     |    | 16 | 17 | 18 |
| 20             | 21                                  | 22            | 23        | 24                       | 25                 | 26                                        | 27   | 28   | 29    | 30                     | 31 | 32 | 33 | 34 |
| Authors (year) | Geography                           | Sample year   | Cases     | Controls                 | Assessment methods | Number of measurement levels <sup>1</sup> |      |      |       | NOS score <sup>2</sup> |    |    |    |    |
|                |                                     |               |           |                          |                    | Dich.                                     | Nom. | Ord. | Cont. |                        |    |    |    |    |
| 35             | <i>Cannon and colleagues</i> [9]    | United States | 1995-1997 | 353                      | 3894874            | record documentation                      | 1    |      | 2     |                        |    |    |    | 4  |
| 36             | <i>Ceccanti and colleagues</i> [40] | Italy         | 2014      | 39                       | 108                | interview                                 | 1    |      |       |                        | 6  |    |    | 9  |
| 37             | <i>Coyne and colleagues</i> [41]    | Australia     | 1994-2006 | 54                       | 56                 | self-report                               |      |      | 2     |                        |    |    |    | 5  |
| 38             | <i>Davies and colleagues</i> [42]   | South Africa  | 2002-2003 | 39                       | 36                 | interview                                 |      | 1    |       |                        |    |    |    | 6  |
| 39             | <i>May and colleagues</i> [43]      | South Africa  |           | 46                       | 42                 | interview                                 |      |      | 4     |                        |    |    |    | 6  |
| 40             | <i>May and colleagues</i> [44]      | South Africa  | 1999-2001 | 53                       | 116                | interview                                 |      |      | 4     |                        |    |    |    | 7  |
| 41             | <i>May and colleagues</i> [45]      | South Africa  |           | 61                       | 133                | interview                                 | 5    |      |       |                        |    |    |    | 7  |
| 42             | <i>May and colleagues</i> [46]      | South Africa  | 2002      | 49 FAS, 15 pFAS          | 133                | interview                                 | 1    |      | 4     |                        | 7  |    |    | 6  |
| 43             | <i>May and colleagues</i> [47]      | Italy         | 2011      | 8 FAS, 34 pFAS, 30 FASD  | 122                | interview                                 | 4    |      |       |                        |    |    |    | 9  |
| 44             | <i>May and colleagues</i> [48]      | South Africa  | 2013      | 63 FAS, 48 pFAS, 32 ARND | 81                 | interview                                 | 4    |      |       |                        |    |    |    | 7  |

|    |                 |               |           |                           |        |             |    |   |   |
|----|-----------------|---------------|-----------|---------------------------|--------|-------------|----|---|---|
| 1  |                 |               |           |                           |        |             |    |   |   |
| 2  |                 |               |           |                           |        |             |    |   |   |
| 3  |                 |               |           |                           |        |             |    |   |   |
| 4  | May and         |               |           |                           |        |             |    |   |   |
| 5  | colleagues[49]  | South Africa  | 2013      | 68 FAS, 52 pFAS, 35 ARND  | 90     | interview   | 7  | 1 | 7 |
| 6  |                 |               |           |                           |        |             |    |   |   |
| 7  | May and         |               |           |                           |        |             |    |   |   |
| 8  | colleagues[50]  | United States | 2010-2011 | 30                        |        | interview   | 2  | 4 | 7 |
| 9  |                 |               |           |                           |        |             |    |   |   |
| 10 | May and         |               |           |                           |        |             |    |   |   |
| 11 | colleagues[28]  | South Africa  |           | 43                        |        | interview   | 5  |   | 7 |
| 12 |                 |               |           |                           |        |             |    |   |   |
| 13 | May and         |               |           |                           |        |             |    |   |   |
| 14 | colleagues[51]  | South Africa  | 2011      | 118 FAS, 91 pFAS, 55 ARND | 100    | interview   | 11 | 8 | 7 |
| 15 |                 |               |           |                           |        |             |    |   |   |
| 16 | Miller and      |               |           |                           |        |             |    | 1 |   |
| 17 | colleagues[52]  | United States | 1992-1994 | 22                        | 214499 | unknown     |    |   | 7 |
| 18 |                 |               |           |                           |        |             |    |   |   |
| 19 | O'Leary and     |               |           |                           |        |             |    | 3 |   |
| 20 | colleagues[53]  | Australia     | 1995-1997 |                           |        | self-report |    |   | 6 |
| 21 |                 |               |           |                           |        |             |    |   |   |
| 22 | Petković and    |               |           |                           |        |             | 5  |   |   |
| 23 | Barišić[54]     | Croatia       |           | 55                        | 769    | self-report |    |   | 7 |
| 24 |                 |               |           |                           |        |             |    |   |   |
| 25 | Suttie and      |               |           |                           |        |             |    | 3 |   |
| 26 | colleagues [55] | South Africa  | 2013      | 22 FAS, 26 pFAS           | 69     | interview   |    |   | 5 |
| 27 |                 |               |           |                           |        |             |    |   |   |
| 28 | Urban and       |               |           |                           |        |             | 1  |   |   |
| 29 | colleagues[56]  | South Africa  | 2001-2004 | 82                        | 74     | interview   |    |   | 6 |
| 30 |                 |               |           |                           |        |             |    |   |   |
| 31 | Viljoen and     |               |           |                           |        |             |    | 4 |   |
| 32 | colleagues[57]  | South Africa  | 2001      | 31                        | 31     | interview   |    |   | 6 |
| 33 |                 |               |           |                           |        |             |    |   |   |
| 34 | Viljoen and     |               |           |                           |        |             | 5  |   |   |
| 35 | colleagues[58]  | South Africa  | 2005      | 53                        | 116    | interview   |    |   | 7 |

note <sup>1</sup>measurements of maternal alcohol drinking behavior are categorized in three different levels: dichotomous ('Dich.', e.g., yes/no), nominal ('Nom.', e.g., admitted, negative, unanswered), ordinal ('Ord.', e.g., < 4 drinks, > 4 drinks), continuous ('Cont.', e.g., %). The measures represent the different questions asked for each category (e.g., "drank during the first trimester of pregnancy"). <sup>2</sup>Each study was assessed using the adapted version of the Newcastle – Ottawa Scale (NOS). Scores were allocated from a scale from 0 (poor quality) to a maximum of 10 stars (excellent quality). For more detailed information see resource 5.

**Table 2.** Conclusions made by authors of included studies on maternal drinking behaviors and FASD

| Authors (year)                      | Original authors' conclusions                                                                                                                                                                                                                                                                                                                                                                                                                     |
|-------------------------------------|---------------------------------------------------------------------------------------------------------------------------------------------------------------------------------------------------------------------------------------------------------------------------------------------------------------------------------------------------------------------------------------------------------------------------------------------------|
| <i>Cannon and colleagues</i> [9]    | "Mothers of children with FAS have severe substance abuse behaviors including daily drinking, binge drinking"                                                                                                                                                                                                                                                                                                                                     |
| <i>Ceccanti and colleagues</i> [40] | "Mothers of children with a FASD reported more drinking three months prior to pregnancy, more current drinking, and endorsed questionnaire items indicating that solitary drinking was more common"                                                                                                                                                                                                                                               |
| <i>Coyne and colleagues</i> [41]    | "Mothers of children with FAS reported heavy alcohol intake during pregnancy"                                                                                                                                                                                                                                                                                                                                                                     |
| <i>Davies and colleagues</i> [42]   | "Twenty five mothers with a FASD diagnosed child (69%) reported drinking alcohol, on average, every week during their pregnancy"                                                                                                                                                                                                                                                                                                                  |
| <i>May and colleagues</i> [43]      | "Most drinking is binge drinking. Even though the current drinking quantities reported by both subjects and controls were not high in absolute standards, the most important interpretation of the data is the large differential between subjects and controls. There is no doubt, however, that these mothers drank sufficiently to produce verifiable cases of fetal alcohol syndrome as severe as we have seen anywhere in the United States" |
| <i>May and colleagues</i> [44]      | "Alcohol consumption was much greater for case mothers than for control mothers in all comparisons. Control mothers were more likely to have been abstainers or Light drinkers compared with case mothers, who showed significantly heavier drinking patterns and reported drinking at the same level (53%-55%) or higher during pregnancy (32%-34%) compared with current drinking levels"                                                       |
| <i>May and colleagues</i> [45]      | "Measures of drinking during the index pregnancies are significantly associated with low intelligence and frequent behavioral problems in the children. Reported drinking during pregnancy (.59), drinks per day (.48), three drinks or more per occasion (.51), and five drinks or more per occasion (.45), correlate highly with total dysmorphism in the children"                                                                             |
| <i>May and colleagues</i> [46]      | "In most every variable of maternal alcohol use and abuse, a spectrum emerged based on the final diagnosis of the child with FAS, PFAS, and control. Alcohol use was greatest in quantity, frequency, and duration among the mothers of FAS children, and generally next most severe among mothers of PFAS children, while lowest among controls"                                                                                                 |
| <i>May and colleagues</i> [47]      | "Mothers of children with FASD report heavy current drinking and drinking during the 2nd and 3rd trimesters of the index pregnancy"                                                                                                                                                                                                                                                                                                               |
| <i>May and colleagues</i> [48]      | "Binge drinking of at least two days a week during all trimesters in this population may produce FAS or PFAS, while mothers of children with ARND and exposed children without an FASD are most likely to reduce their average and peak alcohol consumption in the later trimesters"                                                                                                                                                              |

1  
2  
3  
4  
5  
6 *May and colleagues*[49]  
7

"Mean number of drinks per week and drinking 3 and 5 or more drinks per occasion during pregnancy both illustrate the significant difference between mothers of FASD children and those of normal children"

8  
9 *May and colleagues*[50]  
10

"Mothers of children who had a FASD reported more drinking 3 months before pregnancy, and heavy drinking by the father of children who had FASD"

11 *May and colleagues*[28]  
12

"With patterns of heavy episodic (binge) drinking being the most harmful to the fetus"

13  
14  
15  
16 *May and colleagues*[51]  
17

"Outcomes, both physical and cognitive/behavioral, are especially poor among children who were exposed to the highest quantity and frequency of drinking, especially drinks per drinking day and three or more drinks per occasion in both the case control comparisons and the correlation analysis"

18 *Miller and colleagues*[52]  
19

"Mothers of FAS cases were more likely to drink alcohol during pregnancy"

20  
21  
22  
23  
24 *O'Leary and colleagues*[53]  
25

"Heavy PAE in the first trimester was associated with a more than fourfold increased risk of ARBDs. This association was specific to PAE in the first trimester. The finding of twofold increased odds of ARBDs after moderate levels of PAE during late pregnancy is likely because many women also had heavy first trimester exposure and reduced their alcohol intake as pregnancy progressed"

26  
27  
28  
29 *Petković and Barišić*[54]  
30

"Confirmed pregnancy alcohol consumption in the FAS/PFAS group was higher (18.2%) to observed frequency in the whole sample of questioned mothers (11.5%) and significantly higher when compared to non-FAS/PFAS mothers (10.4%)"

31  
32  
33  
34  
35 *Suttie and colleagues* [55]  
36

"No differences were found for prenatal alcohol exposure between the HE subgroup with FAS/PFAS affinity (nonsyndromal heavy exposed with FAS/PFAS-like face signature [HE1]) versus the HE subgroup with control affinity (nonsyndromal heavy exposed with more control-like face signature [HE2]) (P < .10)"

37  
38 *Urban and colleagues*[56]  
39

"Maternal drinking during pregnancy was much more frequently reported in mothers of children with FAS/PFAS than in controls"

40  
41  
42  
43  
44 *Viljoen and colleagues*[57]  
45

"Mothers of children with FAS drank significantly heavier than controls, especially for continues drinking heavily (and/or increasing) throughout pregnancy. Control mothers drank less and drinking levels declined during pregnancy. Episodic drinking on weekends was modal for both groups with bingeing 5+ drinks was normative during 2 constructive days for FAS mothers "

46  
47  
48 *Viljoen and colleagues*[58]  
49

"Mothers of children with FAS drink more than controls, drink rapidly and drink heavily in an episodic fashion. Moreover, they do not quit or cut down during pregnancy"

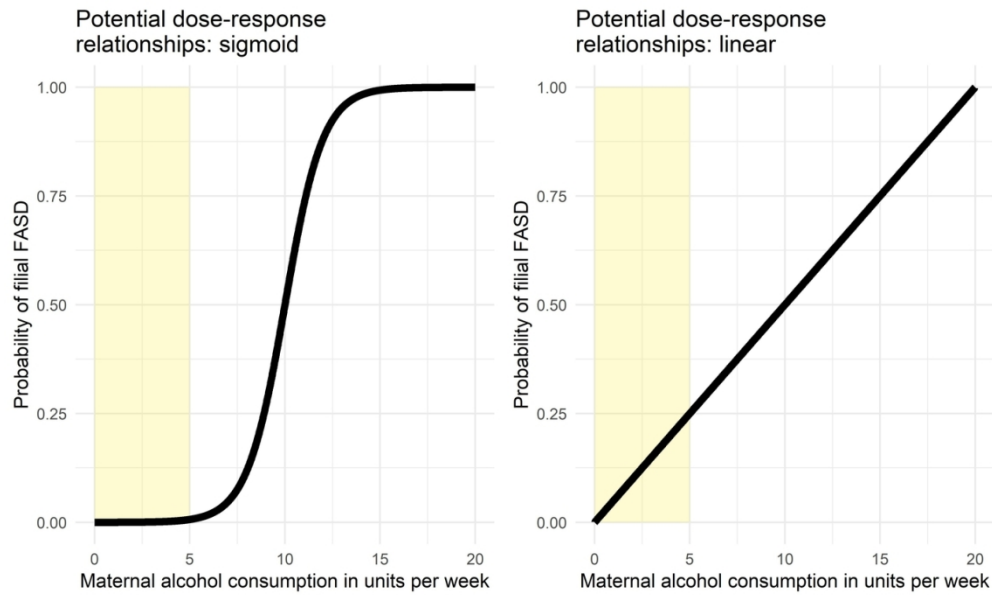

Figure 1. Two examples of possible dose-response relationships between maternal alcohol consumption and probability of filial FASD.

119x71mm (300 x 300 DPI)



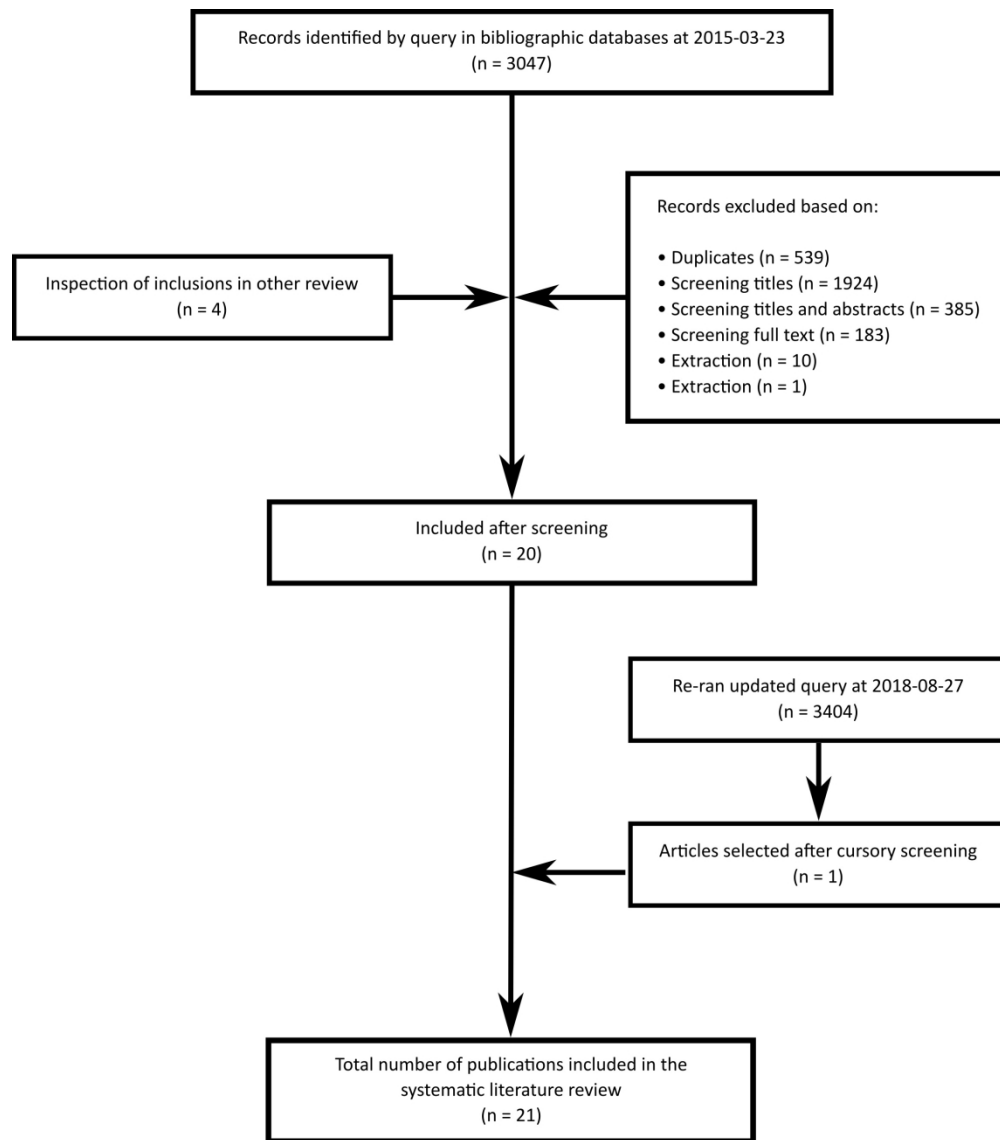

43 Figure 2. Flow chart of publications measuring maternal behavior(s) related to FASD included in the review.  
44 Details regarding the screening procedure and number of exclusions per exclusion criterion can be inspected  
45 at resource 2.

46 615x697mm (96 x 96 DPI)

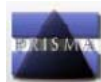

# PRISMA 2009 Checklist

| Section/topic                      | #  | Checklist item                                                                                                                                                                                                                                                                                              | Reported on page # |
|------------------------------------|----|-------------------------------------------------------------------------------------------------------------------------------------------------------------------------------------------------------------------------------------------------------------------------------------------------------------|--------------------|
| <b>TITLE</b>                       |    |                                                                                                                                                                                                                                                                                                             |                    |
| Title                              | 1  | Identify the report as a systematic review, meta-analysis, or both.                                                                                                                                                                                                                                         | 1                  |
| <b>ABSTRACT</b>                    |    |                                                                                                                                                                                                                                                                                                             |                    |
| Structured summary                 | 2  | Provide a structured summary including, as applicable: background; objectives; data sources; study eligibility criteria, participants, and interventions; study appraisal and synthesis methods; results; limitations; conclusions and implications of key findings; systematic review registration number. | 2                  |
| <b>INTRODUCTION</b>                |    |                                                                                                                                                                                                                                                                                                             |                    |
| Rationale                          | 3  | Describe the rationale for the review in the context of what is already known.                                                                                                                                                                                                                              | 4-5                |
| Objectives                         | 4  | Provide an explicit statement of questions being addressed with reference to participants, interventions, comparisons, outcomes, and study design (PICOS).                                                                                                                                                  | 5                  |
| <b>METHODS</b>                     |    |                                                                                                                                                                                                                                                                                                             |                    |
| Protocol and registration          | 5  | Indicate if a review protocol exists, if and where it can be accessed (e.g., Web address), and, if available, provide registration information including registration number.                                                                                                                               | NA                 |
| Eligibility criteria               | 6  | Specify study characteristics (e.g., PICOS, length of follow-up) and report characteristics (e.g., years considered, language, publication status) used as criteria for eligibility, giving rationale.                                                                                                      | 5-6                |
| Information sources                | 7  | Describe all information sources (e.g., databases with dates of coverage, contact with study authors to identify additional studies) in the search and date last searched.                                                                                                                                  | 5-6                |
| Search                             | 8  | Present full electronic search strategy for at least one database, including any limits used, such that it could be repeated.                                                                                                                                                                               | 5                  |
| Study selection                    | 9  | State the process for selecting studies (i.e., screening, eligibility, included in systematic review, and, if applicable, included in the meta-analysis).                                                                                                                                                   | 5-6                |
| Data collection process            | 10 | Describe method of data extraction from reports (e.g., piloted forms, independently, in duplicate) and any processes for obtaining and confirming data from investigators.                                                                                                                                  | 5-6                |
| Data items                         | 11 | List and define all variables for which data were sought (e.g., PICOS, funding sources) and any assumptions and simplifications made.                                                                                                                                                                       | 6                  |
| Risk of bias in individual studies | 12 | Describe methods used for assessing risk of bias of individual studies (including specification of whether this was done at the study or outcome level), and how this information is to be used in any data synthesis.                                                                                      | NA                 |
| Summary measures                   | 13 | State the principal summary measures (e.g., risk ratio, difference in means).                                                                                                                                                                                                                               | 6                  |
| Synthesis of results               | 14 | Describe the methods of handling data and combining results of studies, if done, including measures of consistency (e.g., $I^2$ ) for each meta-analysis.                                                                                                                                                   | 6                  |



# PRISMA 2009 Checklist

| Section/topic                 | #  | Checklist item                                                                                                                                                                                           | Reported on page # |
|-------------------------------|----|----------------------------------------------------------------------------------------------------------------------------------------------------------------------------------------------------------|--------------------|
| Risk of bias across studies   | 15 | Specify any assessment of risk of bias that may affect the cumulative evidence (e.g., publication bias, selective reporting within studies).                                                             | NA                 |
| Additional analyses           | 16 | Describe methods of additional analyses (e.g., sensitivity or subgroup analyses, meta-regression), if done, indicating which were pre-specified.                                                         | 6                  |
| <b>RESULTS</b>                |    |                                                                                                                                                                                                          |                    |
| Study selection               | 17 | Give numbers of studies screened, assessed for eligibility, and included in the review, with reasons for exclusions at each stage, ideally with a flow diagram.                                          | 7                  |
| Study characteristics         | 18 | For each study, present characteristics for which data were extracted (e.g., study size, PICOS, follow-up period) and provide the citations.                                                             | 7                  |
| Risk of bias within studies   | 19 | Present data on risk of bias of each study and, if available, any outcome level assessment (see item 12).                                                                                                | NA                 |
| Results of individual studies | 20 | For all outcomes considered (benefits or harms), present, for each study: (a) simple summary data for each intervention group (b) effect estimates and confidence intervals, ideally with a forest plot. | 7-9                |
| Synthesis of results          | 21 | Present results of each meta-analysis done, including confidence intervals and measures of consistency.                                                                                                  | 7-9                |
| Risk of bias across studies   | 22 | Present results of any assessment of risk of bias across studies (see Item 15).                                                                                                                          | NA                 |
| Additional analysis           | 23 | Give results of additional analyses, if done (e.g., sensitivity or subgroup analyses, meta-regression [see Item 16]).                                                                                    | 7-9                |
| <b>DISCUSSION</b>             |    |                                                                                                                                                                                                          |                    |
| Summary of evidence           | 24 | Summarize the main findings including the strength of evidence for each main outcome; consider their relevance to key groups (e.g., healthcare providers, users, and policy makers).                     | 10                 |
| Limitations                   | 25 | Discuss limitations at study and outcome level (e.g., risk of bias), and at review-level (e.g., incomplete retrieval of identified research, reporting bias).                                            | 10                 |
| Conclusions                   | 26 | Provide a general interpretation of the results in the context of other evidence, and implications for future research.                                                                                  | 10-12              |
| <b>FUNDING</b>                |    |                                                                                                                                                                                                          |                    |
| Funding                       | 27 | Describe sources of funding for the systematic review and other support (e.g., supply of data); role of funders for the systematic review.                                                               | 15                 |

From: Moher D, Liberati A, Tetzlaff J, Altman DG, The PRISMA Group (2009). Preferred Reporting Items for Systematic Reviews and Meta-Analyses: The PRISMA Statement. PLoS Med 6(6): e1000097. doi:10.1371/journal.pmed1000097

For more information, visit: [www.prisma-statement.org](http://www.prisma-statement.org).

## The PRISMA for Abstracts Checklist

| TITLE                                     | CHECKLIST ITEM                                                                                                                                                                                       | REPORTED ON PAGE # |
|-------------------------------------------|------------------------------------------------------------------------------------------------------------------------------------------------------------------------------------------------------|--------------------|
| 1. Title:                                 | Identify the report as a systematic review, meta-analysis, or both.                                                                                                                                  | 1                  |
| <b>BACKGROUND</b>                         |                                                                                                                                                                                                      |                    |
| 2. Objectives:                            | The research question including components such as participants, interventions, comparators, and outcomes.                                                                                           | 4                  |
| <b>METHODS</b>                            |                                                                                                                                                                                                      |                    |
| 3. Eligibility criteria:                  | Study and report characteristics used as criteria for inclusion.                                                                                                                                     | 4                  |
| 4. Information sources:                   | Key databases searched and search dates.                                                                                                                                                             | 4                  |
| 5. Risk of bias:                          | Methods of assessing risk of bias.                                                                                                                                                                   | NA                 |
| <b>RESULTS</b>                            |                                                                                                                                                                                                      |                    |
| 6. Included studies:                      | Number and type of included studies and participants and relevant characteristics of studies.                                                                                                        | 4                  |
| 7. Synthesis of results:                  | Results for main outcomes (benefits and harms), preferably indicating the number of studies and participants for each. If meta-analysis was done, include summary measures and confidence intervals. | 4                  |
| 8. Description of the effect:             | Direction of the effect (i.e. which group is favoured) and size of the effect in terms meaningful to clinicians and patients.                                                                        | NA                 |
| <b>DISCUSSION</b>                         |                                                                                                                                                                                                      |                    |
| 9. Strengths and Limitations of evidence: | Brief summary of strengths and limitations of evidence (e.g. inconsistency, imprecision, indirectness, or risk of bias, other supporting or conflicting evidence)                                    | 5                  |
| 10. Interpretation:                       | General interpretation of the results and important implications                                                                                                                                     | 5                  |
| <b>OTHER</b>                              |                                                                                                                                                                                                      |                    |
| 11. Funding:                              | Primary source of funding for the review.                                                                                                                                                            | NA                 |
| 12. Registration:                         | Registration number and registry name.                                                                                                                                                               | NA                 |

# BMJ Open

## Systematic literature review on which maternal alcohol behaviors are related to Fetal Alcohol Spectrum Disorders (FASD).

|                                 |                                                                                                                                                                                                                                                                                                                                                                                                                                                                                                                                                                                                                                                                                                                                                                                                                                                                                                                                                                                                                                    |
|---------------------------------|------------------------------------------------------------------------------------------------------------------------------------------------------------------------------------------------------------------------------------------------------------------------------------------------------------------------------------------------------------------------------------------------------------------------------------------------------------------------------------------------------------------------------------------------------------------------------------------------------------------------------------------------------------------------------------------------------------------------------------------------------------------------------------------------------------------------------------------------------------------------------------------------------------------------------------------------------------------------------------------------------------------------------------|
| Journal:                        | <i>BMJ Open</i>                                                                                                                                                                                                                                                                                                                                                                                                                                                                                                                                                                                                                                                                                                                                                                                                                                                                                                                                                                                                                    |
| Manuscript ID                   | bmjopen-2018-022578.R2                                                                                                                                                                                                                                                                                                                                                                                                                                                                                                                                                                                                                                                                                                                                                                                                                                                                                                                                                                                                             |
| Article Type:                   | Research                                                                                                                                                                                                                                                                                                                                                                                                                                                                                                                                                                                                                                                                                                                                                                                                                                                                                                                                                                                                                           |
| Date Submitted by the Author:   | 20-Nov-2018                                                                                                                                                                                                                                                                                                                                                                                                                                                                                                                                                                                                                                                                                                                                                                                                                                                                                                                                                                                                                        |
| Complete List of Authors:       | Roozen, Sylvia; Governor Kremers Centre, Maastricht University Medical Centre; Maastricht University, Department of Work and Social Psychology<br>Peters, Gjalte-Jorn; Open University, Faculty of Psychology and Education Science; Maastricht University, Work and Social Psychology<br>Kok, Gerjo; Governor Kremers Centre, Maastricht University Medical Centre; Maastricht University, Department of Work and Social Psychology<br>Townend, David; Governor Kremers Centre, Maastricht University Medical Centre; Maastricht University, Department of Health, Ethics & Society<br>Nijhuis, Jan; Governor Kremers Centre, Maastricht University Medical Centre; Maastricht University Medical Centre, Department of Obstetrics & Gynaecology<br>Koek, Ger; Governor Kremers Centre, Maastricht University Medical Centre; Maastricht University Medical Centre, Department of Internal Medicine, Division of Gastroenterology and Hepatology<br>Curfs, Leopold; Governor Kremers Centre, Maastricht University Medical Centre |
| <b>Primary Subject Heading</b>: | Public health                                                                                                                                                                                                                                                                                                                                                                                                                                                                                                                                                                                                                                                                                                                                                                                                                                                                                                                                                                                                                      |
| Secondary Subject Heading:      | Global health, Public health                                                                                                                                                                                                                                                                                                                                                                                                                                                                                                                                                                                                                                                                                                                                                                                                                                                                                                                                                                                                       |
| Keywords:                       | Prenatal diagnosis < OBSTETRICS, Substance misuse < PSYCHIATRY, PREVENTIVE MEDICINE                                                                                                                                                                                                                                                                                                                                                                                                                                                                                                                                                                                                                                                                                                                                                                                                                                                                                                                                                |
|                                 |                                                                                                                                                                                                                                                                                                                                                                                                                                                                                                                                                                                                                                                                                                                                                                                                                                                                                                                                                                                                                                    |

SCHOLARONE™  
Manuscripts

# Systematic literature review on which maternal alcohol behaviors are related to Fetal Alcohol Spectrum Disorders (FASD).

Sylvia Roozen<sup>1,2</sup>

sylvia.roozen@maastrichtuniversity.nl

<sup>1</sup> Governor Kremers Centre, Maastricht University Medical Centre, PO Box 5800, 6202 AZ Maastricht, the Netherlands

<sup>2</sup> Department of Work and Social Psychology, Maastricht University, PO Box 616, 6200 MD Maastricht, the Netherlands

Gjalt-Jorn Y. Peters<sup>2,3</sup>

gjalt-jorn@behaviorchange.eu

<sup>2</sup> Department of Work and Social Psychology, Maastricht University, PO Box 616, 6200 MD Maastricht, the Netherlands

<sup>3</sup> Faculty of Psychology and Education Science, Open University of The Netherlands, PO Box 2960, 6401 DL Heerlen, the Netherlands

Gerjo Kok<sup>1,2</sup>

g.kok@maastrichtuniversity.nl

<sup>1</sup> Governor Kremers Centre, Maastricht University Medical Centre, PO Box 5800, 6202 AZ Maastricht, the Netherlands

<sup>2</sup> Department of Work and Social Psychology, Maastricht University, PO Box 616, 6200 MD Maastricht, the Netherlands

David Townend<sup>1,4</sup>

d.townend@maastrichtuniversity.nl

<sup>1</sup> Governor Kremers Centre, Maastricht University Medical Centre, PO Box 5800, 6202 AZ Maastricht, the Netherlands

<sup>4</sup> Department of Health, Ethics & Society, Maastricht University, PO Box 616, 6200 MD Maastricht, the Netherlands

1  
2  
3  
4  
5 Jan Nijhuis<sup>1,5</sup>

6 jg.nijhuis@mumc.nl  
7  
8

9  
10 <sup>1</sup> Governor Kremers Centre, Maastricht University Medical Centre, PO Box 5800, 6202 AZ Maastricht, the  
11 Netherlands

12  
13 <sup>5</sup> Department of Obstetrics & Gynaecology, Maastricht University Medical Centre, PO Box 5800, 6202 AZ  
14 Maastricht, the Netherlands  
15

16  
17 Ger Koek<sup>1,6</sup>

18 gh.koek@mumc.nl  
19  
20

21  
22 <sup>1</sup> Governor Kremers Centre, Maastricht University Medical Centre, PO Box 5800, 6202 AZ Maastricht, the  
23 Netherlands  
24

25 <sup>6</sup> Department of Internal Medicine, Division of Gastroenterology and Hepatology, Maastricht University  
26 Medical Centre, PO Box 5800, 6202 AZ Maastricht, the Netherlands  
27  
28

29  
30 Leopold Curfs <sup>1</sup>

31 leopold.curfs@maastrichtuniversity.nl  
32  
33

34  
35 <sup>1</sup> Governor Kremers Centre, Maastricht University Medical Centre, PO Box 5800, 6202 AZ Maastricht, the  
36 Netherlands  
37  
38

39 **Correspondence to:**  
40

41 Sylvia Roozen

42 Maastricht University

43 Governor Kremers Centre

44 PO Box 616, 6200 MD Maastricht, The Netherlands

45 Phone: +31 (0)43-3884108

46 Email: sylvia.roozen@maastrichtuniversity  
47  
48  
49  
50  
51  
52  
53  
54  
55  
56  
57  
58  
59  
60

1  
2  
3  
4  
5  
6  
7  
8  
9  
10  
11  
12  
13  
14  
15  
16  
17  
18  
19  
20  
21  
22  
23  
24  
25  
26  
27  
28  
29  
30  
31  
32  
33  
34  
35  
36  
37  
38  
39  
40  
41  
42  
43  
44  
45  
46  
47  
48  
49  
50  
51  
52  
53  
54  
55  
56  
57  
58  
59  
60

**Key Words:**

Prenatal diagnosis; substance misuse; preventive medicine

**Word Count 5,087**

For peer review only



## Abstract

**Objectives:** Fetal Alcohol Spectrum Disorders (FASD) is a worldwide problem. Maternal alcohol consumption is an important risk factor for FASD. It remains unknown which alcohol consumption patterns most strongly predict FASD. The objective of this study was to identify these.

**Design:** Systematic literature review.

**Methods:** We searched in PubMed, PsychINFO, PsycARTICLES, ERIC, CINAHL, EMBASE and MEDLINE up to August 2018. The query consisted of keywords and their synonyms related to FASD, pregnancy, and behavior. Studies were excluded when not published in English, were reviews, or involved non-human subjects. Substantial heterogeneity precluded aggregation or meta-analysis of the data. Instead, data were qualitatively inspected.

**Results:** In total, 21 studies were eligible for further data analysis. All studies that measured both maternal alcohol drinking behaviors and FASD reported retrospective data on maternal drinking patterns, employing both continuous and categorical measures and exhibiting substantial heterogeneity in measures of alcohol consumption (e.g., timing of exposure, quantification of alcohol measure, definition of a standard drink). Study quality improved over time and appeared higher for studies based on active case ascertainment, especially when conducted in schools, and when behavior was assessed through interviews.

**Conclusions:** We aimed to identify specific maternal drinking behavior(s) related to FASD. The state of the literature precludes such conclusions. Evidence-based preventive measures necessitate identifying

1  
2  
3 which prenatal alcohol drinking behavior(s) are most in need of intervention. Therefore, we formulate  
4  
5 three recommendations for future research. First, future studies can optimize the value of the collected  
6  
7 dataset through specifying measurements and reporting of maternal drinking behaviors, and avoiding  
8  
9 categorized measures (nominal or ordinal) whenever possible. Second, samples should not be selected  
10  
11 based on FASD status, but instead, FASD status as well as maternal alcohol consumption should both be  
12  
13 measured in a general population sample. Finally, we provide ten reporting guidelines for FASD research.  
14  
15  
16  
17  
18  
19

### 20 **Strengths and limitations of this study**

- 21 • This systematic literature review uses a comprehensive search strategy to cover the published  
22  
23 literature
- 24 • We did not consult grey literature
- 25 • Consultation about data aggregation took place with three independent alcohol experts
- 26  
27 • Substantial heterogeneity prevented synthesis but yielded a rich set of recommendations as to  
28  
29 reporting guidelines and measurement principles
- 30  
31  
32  
33  
34  
35  
36  
37  
38  
39  
40  
41  
42  
43  
44  
45  
46  
47  
48  
49  
50  
51  
52  
53  
54  
55  
56  
57  
58  
59  
60

## Introduction

Prenatal alcohol exposure is one of the leading causes of mental retardation resulting in irreversible lifelong consequences for the unborn child (e.g., neurocognitive deficits, growth deficiencies, facial dysmorphism) [1]. These adverse outcomes are also known as fetal alcohol spectrum disorders (FASD).

The spectrum encompasses various diagnostic subtypes: fetal alcohol syndrome (FAS), partial fetal alcohol syndrome (pFAS), alcohol related neurodevelopmental disorder (ARND), alcohol related birth defects (ARBD), and neurobehavioral disorder with prenatal alcohol exposure (ND-PAE) [1,2].

Epidemiological research implies that FASD is a worldwide problem. Initial FAS prevalence estimates ranged from 0.5 to 7 per 1,000 livebirths [3,4]. Recent systematic literature reviews [5,6] including multiple meta-analyses reported estimates ranging from 0.11 to 55.42 per 1,000 (FAS), 0.8 to 43.01 per 1,000 (pFAS), 0.12 to 20.25 per 1,000 (ARND), 1.03 to 10.82 per 1,000 (ARBD), and 1.06 to 113.22 per 1,000 (FASD).

FASD, as its name implies, is caused by alcohol use. Several reviews have aimed to further elucidate the relationship between alcohol use and filial FASD [7,8]. Specifically, mothers of children diagnosed in the FASD spectrum reported drinking levels ranging from mild to excessive ('binge drinking') alcohol use [7,9–11] [8,12,13]. The severity of FASD may be dependent on the level, pattern, and timing of prenatal alcohol exposure before and during pregnancy [13,14], along with other confounding factors such as nutritional status of the mother (e.g. vitamin or mineral intake), environmental factors (e.g., social relationships, stress), maternal age, and genetic makeup [14–16]. As yet, there is no known safe amount of alcohol to drink while pregnant [1,13,17,18].

1  
2  
3 Two systematic literature reviews reported associations between level of alcohol exposure and negative  
4 effects on child development [7,11]. Both reviews show the negative effects of higher amounts of alcohol  
5 intake (daily alcohol consumption up to 4 or more drinks per occasion before and during pregnancy)  
6 related to various neuropsychological outcomes (including but not specific for a FASD diagnosis.  
7  
8 However, these reviews are inconclusive about behaviors related to the outcome of FASD specifically  
9  
10 [5,7,11], or the effects of consumption of lower amounts of alcohol.  
11  
12  
13  
14  
15  
16  
17

18  
19 Planning evidence based health promoting programs requires an adequate understanding of which  
20 maternal behavior(s) are associated with FASD. Note that maternal alcohol consumption is not the only  
21 factor for filial FASD. Paternal and even grandparental consumption patterns have also been implicated  
22 [19,20], but as yet it remains undecided whether paternal and grandparental consumption should also  
23 be included in the FASD definition (effects of paternal and grandparental consumption are considered  
24 necessarily either genetic or through influencing maternal alcohol consumption, whereas maternal  
25 alcohol consumption has a direct teratogenic effect). However, for the sake of this review, we limited  
26 ourselves to maternal alcohol consumption. Specifically, a first step for designing prevention programs  
27 requires defining specific target behavior(s) of the target population related to FASD [6,21]. However, the  
28 literature remains inconclusive about which maternal drinking behaviors are related to alterations of the  
29 fetal development. Despite this conflicting and inconclusive evidence of the negative effects on the  
30 developing fetus, public health recommendations are made nonetheless. These recommendations share  
31 one common principle, namely that complete abstinence of alcohol use during pregnancy is the safest  
32 approach to prevent any possible risks to the unborn child [1,13,17,18]. However, despite this common  
33 thread, there are also many differences between the recommendations. For example, the British Medical  
34 Association (BMA) lists four different recommendations that are currently made in the United Kingdom  
35 alone [13]. This heterogeneity is problematic because communicating multiple contrasting  
36  
37  
38  
39  
40  
41  
42  
43  
44  
45  
46  
47  
48  
49  
50  
51  
52  
53  
54  
55  
56  
57  
58  
59  
60

1  
2  
3 recommendations is confusing for the target audiences. At the same time, there are good arguments to  
4  
5 tailor the recommendations. For example, it is likely that although any alcohol consumption may entail  
6  
7 risks, binge drinking (BAC to .08 grams percent or above; 4 or more drinks in about 2 hours) is one of the  
8  
9 serious risk factors and associated with severe forms of FASD [22]. Therefore, it appears that special  
10  
11 attention for specific risk groups such as heavily drinking pregnant women is warranted.  
12  
13  
14  
15

16  
17 Yet, implementing such a tailored approach is currently hindered by the lack of knowledge regarding the  
18  
19 dose-response relationship and potential moderators. On the one hand, insufficient evidence is available  
20  
21 about the association of different alcohol-related behaviors to FASD-related risk, especially low doses of  
22  
23 alcohol, to adequately delineate target groups to enable tailored communication. This would seem to  
24  
25 justify foregoing the heterogeneous recommendations and instead converging on an abstinence  
26  
27 recommendation. However, in some target populations, such a total abstinence recommendation does  
28  
29 not seem feasible. Especially high-risk populations, for example heavily drinking women, may not be able  
30  
31 to completely eliminate their alcohol intake, for example because of personal factors as self-regulation  
32  
33 skills, or environmental factors such as social pressures. Given that a total abstinence recommendation  
34  
35 may be unrealistic for some of the highest-risk populations, such a recommendation can be ethically  
36  
37 problematic.  
38  
39  
40  
41  
42

---

43 Figure 1 about here

---

44  
45  
46  
47 To illustrate this, consider Figure 1. This Figure shows two potential dose-response relationships between  
48  
49 weekly maternal alcohol consumption and risk of filial FASD for a given individual (note that individual  
50  
51 vulnerabilities can vary). The left panel shows a sigmoid relationship, where risk remains low if less than  
52  
53 five units are consumed weekly, whereas in the linear dose-response relationship depicted in the right  
54  
55  
56  
57  
58  
59  
60

1  
2  
3 panel, risk is already considerable at five consumptions weekly. For those subpopulations where  
4  
5 abstinence recommendations may be unrealistic, if the dose-response relationship is similar to that  
6  
7 shown in the left panel, a harm reduction message such as 'consume at most five units' (the yellow areas  
8  
9 in Figure 1) may be easier to defend than if the dose-response relationship is linear. Not only may such a  
10  
11 message be easier to defend: it may be more effective at decreasing FASD prevalence. Setting  
12  
13 unachievable goals has little behavior change potential [23], and if a more achievable goal can stimulate  
14  
15 the target population to moderate their alcohol intake enough to decrease the risk of FASD, while an  
16  
17 abstinence message, being unrealistic, has no effect, the ethics of an abstinence message become  
18  
19 questionable. If, however, the risk increases very rapidly even with light alcohol consumption, deviating  
20  
21 from an abstinence message may be damaging.  
22  
23  
24  
25  
26  
27

28 Animal models have provided some evidence as to potential dose-response relationships. However, such  
29  
30 models are not fully translatable to humans [16], and especially given that the present research question  
31  
32 concerns not simply whether a dose-response relationship exists, but what the *nature* of this relationship  
33  
34 is, relying on animal models does not seem appropriate.  
35  
36  
37  
38

39 Further research is warranted to identify behaviors for health promotion programs to target on.

40  
41 Developing health promoting programs aiming at reducing alcohol consumption during pregnancy first  
42  
43 requires identifying which prenatal alcohol drinking behavior(s) are most in need of intervention. The  
44  
45 purpose of the present study is to conduct a systematic literature review and meta-analysis to identify  
46  
47 those maternal alcohol drinking behaviors most strongly related to FASD.  
48  
49  
50  
51  
52  
53  
54  
55  
56  
57  
58  
59  
60

## Materials and Methods

### *Protocol and data repository*

Data will be reported following the PRISMA guideline [24]. All materials and supporting documents are publicly available at the Open Science Framework repository at <https://osf.io/whq45/>. In this repository, we have numbered the directories that organize the materials. Hereafter, we will refer to materials in this repository as “resource 1” through “resource 8”, which correspond to these directories.

### *Ethics statement and patient and public involvement*

The current study extracted data from online databases and did not involve participation of participants; therefore, it was not necessary to obtain ethical permission.

### *Search strategy*

A search was conducted in PubMed, PsychINFO, PsychARTICLES, ERIC, CINAHL, EMBASE and MEDLINE databases up to August 2015 using an extensive query consisting of keywords related to FASD, pregnancy and behavior (e.g., fetal alcohol syndrome, pregnancy, alcohol use, risk factor). We reran the query just before submitting the manuscript in August 2018 and performed a cursory inspection to scan for newly added papers. Moreover, we applied the ascendancy approach by inspecting the reference lists of included articles (the complete queries are included in resource 1).

### *Study selection*

Resulting hits from the query were exported and screened by two independent screeners in three rounds. The first screening round was based on titles only; the second, on titles and abstracts; and the

1  
2  
3 third, on the full text articles. Records were included if they were written in English and reported  
4 maternal alcohol related behaviors associated with a FASD diagnosis. Records that were duplicates,  
5  
6 concerned reviews or meta-analysis, or concerned studies that involved non-human subjects were  
7  
8 excluded. An extensive list of inclusion and exclusion criteria is located in the screening instructions  
9  
10  
11  
12 (resource 2).  
13  
14  
15

### 16 *Data extraction*

17  
18 Data were transferred onto extraction forms, which were templated source code files for R [25], using  
19  
20 Notepad++. Researcher SR completed all extraction forms including the following variables: sampling  
21  
22 method (retrospective versus prospective), sampling selection (select versus aselect), variables on which  
23  
24 controls were matched (e.g., age mother, study year of the child), recruitment setting (e.g., school,  
25  
26 clinic), descent (native versus nonnative population), geography, year of data collection, sample size,  
27  
28 subsamples, method of diagnosis (e.g., IOM, 4-digit), syndrome category (e.g., FAS, ARND), datatype  
29  
30 (e.g., aggregate, question), datatype levels (e.g., nominal, logical), confirmed maternal alcohol exposure,  
31  
32 method of case ascertainment (active versus passive), data collection method (self-report versus  
33  
34 interview). Moreover, variables related to drinking behaviors were extracted. Specifically, period of  
35  
36 alcohol consumption (e.g., first trimester, before pregnancy), timeframe (concurrent versus  
37  
38 retrospective), intensity specification (e.g., any day, weekend day), specification of units (e.g., oz, mg),  
39  
40 specification of timeframe (e.g., per year, per month), bingeing, and alcoholism. Also, when no indication  
41  
42 of one standard drink was provided, the units in grams were granted depending on country and their  
43  
44 national alcohol guidelines (e.g., one standard drink in the United States = 14 gr, Australia = 10 gr; see  
45  
46 resource 5). These extraction forms were then read into R and processed by an R script.  
47  
48  
49  
50  
51  
52  
53

### 54 *Quality assessment*



1  
2  
3 A slightly adapted ) version of the Newcastle–Ottawa Scale (NOS) was used for assessing the quality of  
4 nonrandomized studies for further meta-analysis with a maximum of 10 stars [26] (see resource 4 for the  
5 complete assessment and comparison to the original version) The quality of each publication was  
6 assessed by two independent reviewers (inter rater reliability = 80%) who settled differences by  
7 discussion.. No studies were excluded based on this quality assessment.  
8  
9  
10  
11  
12  
13  
14  
15

### 16 *Data synthesis and statistical analysis*

17  
18 In case of sufficient homogeneity, meta-analyses and meta-regressions were to be conducted using  
19 metafor, a free package in R [27].  
20  
21  
22  
23  
24

---

25  
26 Figure 2 About Here  
27  
28  
29  
30

---

## 31 **Results**

32  
33  
34 The systematic literature review resulted in 3404 identified hits (see Figure 2). Twenty-one hits qualified  
35 for further screening and analysis. Hits were excluded because they were duplicates, not written in  
36 English, or did not report associations between prenatal alcohol and FASD. The assessment of the  
37 included studies using the NOS scale revealed a wide range of quality scores with an average score of  
38  
39  
40  
41  
42  
43  
44 6.57 out of 10 (for more details, see resource 5).  
45  
46  
47  
48  
49

### 50 *Sample characteristics*

51  
52  
53 Sample characteristics can be inspected in Table 1. First, inspection of the data shows that the included  
54 studies were reported from five different countries, including Australia ( $n = 2$ ), Croatia ( $n = 1$ ), Italy ( $n =$   
55  
56  
57  
58  
59  
60

2), South Africa ( $n = 12$ ), and United States ( $n = 4$ ). All studies were conducted after the year 1992.

Almost all studies relied on interviews ( $n = 17$ ), followed by self-reports ( $n = 3$ ), and medical records ( $n = 1$ ). Moreover, all studies were based on a retrospective sampling method. Behavior was described in terms of maternal alcohol drinking related to a FASD diagnosis. Behaviors were reported before and during pregnancy where the period during pregnancy was specified per trimester (e.g., first, second, third).

Further inspection shows that alcohol consumption was operationalized differently in each study (e.g., dichotomous measures; a complete table can be found in Table 1): in fact, no two studies used the same measure. Some studies reported units, whereas other studies reported subjective estimates (e.g., many, less than). Others used dichotomous measures (e.g., yes or no), a mixture of ordinal measures (e.g., none, mild, moderate, heavy), or interval variables (e.g., percentage). The original author's conclusions on maternal drinking behaviors & FASD can be inspected in Table 2.

#### *Dichotomous measures*

Dichotomous measures (e.g., yes versus no) were available for 12 studies representing 44 measures (see Table 1). These included questions concerning alcohol consumption before pregnancy [7, 10, 11, 20].

Questions concerning alcohol consumption during pregnancy [2, 8, 14] included the following variables: binge drinking without specifying how this was defined [2, 8], alcoholism [1], binge drinking (3 or more drinks per occasion; 5 or more drinks per occasion) [9, 10, 12, 13, 14], alcohol consumption in general [7, 9, 11, 17, 19], smoking as well as binge drinking (3 or more drinks per occasion; 5 or more drinks per occasion [13]. Moreover, questions were measured if pregnant women drank alcohol during the first trimester of pregnancy [7, 9, 11, 13, 14, 17, 21]; second trimester [7, 9, 11, 13, 14, 17, 21]; and/ or third trimester [7, 9, 11, 13, 14, 17, 21]. For more detailed information see resource 5.

#### *Nominal measures*

1  
2  
3 Although alcohol consumption is in fact a continuous variable, it was still operationalized at the nominal  
4 level in six nominal measures used in two studies [4, 17]. For more detailed information see resource 5.  
5  
6

### 7 8 *Ordinal measures* 9

10  
11 In total, 24 ordinal measures were used in eight studies (see also the numbered studies in Table 1). These  
12 incorporated questions concerning alcohol consumption before pregnancy [3], sometimes specified in  
13 categories of units e.g., grams a week, stopped during drinking or drank less than current use [3, 5, 6, 8,  
14 20]; and alcohol consumption during pregnancy [1], including variables measuring the categories of  
15 alcohol intake in units of e.g., grams a week [3, 15]. Moreover, questions were measured for each  
16 trimester of pregnancy; alcohol consumption during first trimester of pregnancy [5, 8, 20] whereby  
17 variables were specified with categories e.g., drank less or drank more than current use [5, 8, 20]; alcohol  
18 consumption during second trimester [5, 6, 8, 20] using the categories e.g., drank less or drank more  
19 than current use [5, 6, 8, 20]; and alcohol consumption during the third trimester [5, 6, 8, 20] whereby  
20 variables were specified with categories e.g., drank less or drank more than current use [5, 6, 8, 20]. For  
21 more detailed information see resource 5.  
22  
23  
24  
25  
26  
27  
28  
29  
30  
31  
32  
33  
34  
35

### 36 37 *Continuous measures* 38

39  
40 Surprisingly, continuous measures were only available for six studies. In total, these studies employed 29  
41 measures (see Table 1). These included questions concerning alcohol consumption before pregnancy [2,  
42 8, 10, 12, 18] where variables were sometimes specified in number of drinks e.g., a day or week [8, 10,  
43 14]; and during pregnancy [10, 14], where variables were sometimes specified in number of drinks e.g.,  
44 during a drinking day, week, weekend [2, 11, 12, 14, 18]. Moreover, number of alcoholic drinks or  
45 drinking days were measured during the first trimester of pregnancy [2, 10, 12, 14], sometimes specified  
46 in numbers a day or estimated BAC [8]; number of drinks or drinking days during second trimester [2, 10,  
47 12, 14], sometimes specified in numbers a day or estimated BAC [8]; and/ or number of drinks or  
48  
49  
50  
51  
52  
53  
54  
55  
56  
57  
58  
59  
60

1  
2  
3 drinking days during third trimester [2, 10, 12, 14], sometimes specified in numbers a day or estimated  
4  
5 BAC [8].  
6

---

7  
8 Table 1 About Here  
9

---

10  
11  
12  
13  
14  
15  
16  
17 Table 2 About Here  
18

---

19  
20 *Integration*  
21

22  
23  
24 Categorical variables were based on different answer options and cut-off values, which precluded further  
25  
26 aggregation or integration. Operationalizations on a continuous level of measurement also displayed  
27  
28 substantial variation. Where possible, we attempted to transform these continuous measures of alcohol  
29  
30 consumption into the same metric (e.g., one standard drink defined in grams). However, even this was  
31  
32 hindered by heterogeneity in reported standard sizes (sometimes not reported at all), types of alcohol  
33  
34 described, and other variation across countries. Moreover, few studies reported continuous data.  
35

36  
37 Because of these reasons, conducting meta-analyses of the continuous variables alone was not feasible.  
38

39  
40 Consultation with three independent alcohol experts (e.g., expertise in pharmacology of alcohol and  
41  
42 measurements of alcohol drinking behaviors) revealed that aggregation of variables in the current  
43  
44 dataset was not feasible. This substantial heterogeneity in operationalizations hindered further meta-  
45  
46 analyses, and therefore the data will be described qualitatively below with emphasis on the used  
47  
48 operationalizations and timing of exposure.  
49

50  
51  
52 Because aggregation of the evidence was not possible, we instead sought to explore the heterogeneity  
53  
54 exhibited by the included studies (note that all 230 extracted effect sizes are available in file  
55  
56  
57  
58  
59  
60

1  
2  
3 'effectsizes.csv', and an overview of the used operationalisations in 'Alcohol use variables.csv', both in  
4 resource 6). Given the small number of included studies, we decided to inspect visualizations of the  
5 associations between study characteristics. We plotted the quality of the studies (NOS scores), study  
6 year, measurement level of the alcohol consumption operationalization, recruitment setting, and data  
7 collection methods.  
8  
9

10  
11  
12  
13  
14  
15 These visualizations revealed interesting patterns. The quality of studies (NOS score) seem to improve  
16 over the years. Data derived from clinical records were mainly based on ordinal measures. NOS score  
17 appeared higher for studies where maternal alcohol history was based on interviews. Finally, NOS scores  
18 appeared higher for samples recruited through active case ascertainment, especially in schools. We have  
19 included these visualizations in resource 6).  
20  
21  
22  
23  
24  
25

26  
27 The wide range of variation in operationalisations provided a unique opportunity to compare them.  
28  
29 Continuous measures provide detailed information about specific units (e.g., oz, standard drink, BAC). If  
30 reported similarly across studies, these could be further meta-analyzed. However, this requires reporting  
31 all information needed to convert the reported statistics into grams or milliliters of alcohol, to enable  
32 integration with results from other countries. Other challenges appear to be present for logical, nominal  
33 and ordinal measures (e.g., cut-off scores). Some studies reported categories e.g., binge drinking  
34 including 3 or more drinks per occasion versus 5 or more drinks per occasion [28]; less than 4 drinks a  
35 day versus more than 4 drinks a day [9]. None of the studies reported a description and considerations of  
36 why certain cut-off scores were chosen. Cut-off scores likely often followed recommendations by health  
37 promotion agencies or suggestions from earlier studies, but without explicit specification this remains  
38 unclear. Perhaps the difficulty of establishing sensible cut-off values partly explains this, as doing so  
39 requires evidence syntheses to determine where exactly the effects of the relevant behavior becomes  
40 qualitatively different. Such evidence (e.g., meta-analyses of maternal alcohol consumption patterns) is  
41  
42  
43  
44  
45  
46  
47  
48  
49  
50  
51  
52  
53  
54  
55  
56  
57  
58  
59  
60

1  
2  
3 not yet available. However, this should lead researchers to employ continuous operationalisations for  
4  
5 now, rather than selecting (more or less arbitrary) cut-off scores.  
6  
7  
8  
9

## 11 Discussion

12  
13  
14

15 In this systematic literature review, we aimed to summarize available data of studies that reported  
16  
17 maternal alcohol drinking behaviors in relation to FASD. Data were available for 21 studies. The majority  
18  
19 of these 20 studies were based on retrospective self-reports or interviews. A substantial heterogeneity in  
20  
21 the applied measures for alcohol consumption was observed. Studies were based on continuous and  
22  
23 categorical measures (dichotomous, nominal, and ordinal). Continuous measures included blood alcohol  
24  
25 content, percentages of drinking days, and alcohol consumption in grams or ounces. Categorical  
26  
27 measures employed a variety of cut-offs to distinguish the different categories. This heterogeneity was  
28  
29 so substantial that it precluded meta-analyses. Therefore, it was not possible to answer the original  
30  
31 research question: the extant literature does not enable any conclusions as to the relationship between  
32  
33 maternal alcohol consumption and the likelihood of infants developing FASD. Instead, however, a wealth  
34  
35 of suggestions for future research was distilled from the literature.  
36  
37  
38  
39

40 The most striking finding was the variation in measurement instruments that were employed to assess  
41  
42 maternal drinking behavior. Each of the 20 included studies operationalized measures of alcohol  
43  
44 consumption differently. The majority of studies used categorical measures. This is not desirable as these  
45  
46 impose a discontinuous scale using cut-off scores. Because, as this review evidences, there exists  
47  
48 insufficient evidence to derive whether alcohol consumption (as relating to FASD risk) should be  
49  
50 considered as a continuous or discontinuous scale, and where the cut-offs should lie in the case of a  
51  
52 discontinuous scale, such cut-off scores are necessarily arbitrary to a degree. In addition, categorizing  
53  
54  
55  
56  
57  
58  
59  
60

1  
2  
3 continuous data discards variance, thereby potentially obfuscating associations between variables [29–  
4  
5 31]. The variation in cut-off scores exhibited in the studies included in this review supports this  
6  
7 assumption of arbitrariness, and prohibits aggregation of the data collected in those studies. When  
8  
9 studies did use continuous measures, studies often did not report how many grams of alcohol were in  
10  
11 one standard drink. By making assumptions (e.g., based on the standard drink size in the country of data  
12  
13 collection) we were able to convert most standard drink-based measures into grams of alcohol, but this  
14  
15 was not always feasible.  
16  
17

### 18 19 *Strengths and limitations* 20

21  
22 One of the reasons for this heterogeneity may be that none of the included studies were conducted  
23  
24 primarily to investigate the association between maternal drinking behavior and FASD: although both  
25  
26 variables were frequently measured and reported, most studies were designed to determine prevalence  
27  
28 or FASD symptoms. It appears that few or no studies have been designed specifically to empirically  
29  
30 establish how maternal alcohol consumption in humans is related to the likelihood of FASD. Given the  
31  
32 comprehensive set up of this literature review, it is unlikely that such attempts have been overlooked.  
33  
34 The search query was very extensive, rendering omission of relevant keywords unlikely. Screening was  
35  
36 conducted in three screening rounds, by two independent screeners, and all records flagged for inclusion  
37  
38 by one screener were retained for closer inspection. In addition, the ascendancy approach was applied.  
39  
40 Given that reports of studies where these variables were secondary measures preclude conclusions  
41  
42 about this relationship, it is as yet not possible to establish which recommendations can be empirically  
43  
44 justified. In other words, even though in some target populations a total abstinence recommendation  
45  
46 does not seem feasible. Available literature as yet offers no clear guidance that enables exploring a  
47  
48 recommendation that could balance feasibility for the target population with dangers to health. Also  
49  
50 Mamluk et al. [32] underlined the lack of data to make robust conclusions on the harmful effects of  
51  
52  
53  
54  
55  
56  
57  
58  
59  
60

1  
2  
3 prenatal alcohol exposure and the unborn child. However, our inspection of the literature did yield a  
4  
5 number of valuable recommendations for future research.  
6  
7

### 8 *Recommendations*

9

10  
11 The original aim of this review was to provide a first step on the road to theory- and evidence-based  
12  
13 intervention development. We had hoped that after identifying the risk related to different behavioral  
14  
15 patterns, we could provide guidelines for prevention workers working with different target populations  
16  
17 (e.g. alcohol-dependent pregnant women or teenage mothers). The next step could then be to map the  
18  
19 determinants of those behaviors in those populations (i.e. why individuals engage in the relevant  
20  
21 undesirable and desirable behaviors)[33]; so that these can be targeted by behavior change principles  
22  
23 [34] that are then integrated into prevention campaigns [35]. However, it seems that the literature as yet  
24  
25 has little guidance to offer. Because designing effective interventions first and foremost requires a  
26  
27 thorough understanding of the target behavior(s), it is therefore important that future research  
28  
29 considers the limitations identified in this review so that in the future, a clearer picture may emerge.  
30  
31  
32  
33

34  
35 The first recommendation is addressed specifically to epidemiological researchers, and is based on the  
36  
37 observation that the majority of studies assessed maternal drinking as part of a prevalence study.  
38  
39 Because these studies form the largest part of the available data regarding associations between  
40  
41 maternal alcohol consumption and FASD outcomes it is important to pay close attention to the  
42  
43 measurement of alcohol consumption, even in epidemiological studies with different primary aims.  
44  
45

46  
47 Second, in general, researchers should anticipate the need to aggregate their measures of alcohol  
48  
49 consumption with measures from other studies: in other words, conversion to consumption in metric  
50  
51 units, such as grams of alcohol, in a specified time period such as week or month, should be possible. If  
52  
53 such conversion cannot be performed, the study cannot contribute to an accumulation of evidence. For  
54  
55 example, many studies did not specify what exactly constituted a unit of alcohol (i.e. one standard drink).  
56  
57



1  
2  
3 This means that it was necessary to try and identify the definition of a unit of alcohol in the country  
4 where the data were collected, in the period where the data were collected, but even then the obtained  
5 definition was unreliable as sometimes researchers conduct studies away from their home country yet  
6 use their home countries' unit definitions when reporting the results. Another example is that if timing of  
7 exposure was not specified, it is not clear whether the behavior occurred during the first, second, or  
8 third trimester (or was an aggregate of those periods).  
9  
10  
11  
12  
13  
14  
15

16  
17 This recommendation translates into a number of specific suggestions. Most of these are covered by  
18 following guidelines for the measurement of alcohol consumption, such as those specified by Dawson  
19 [36] and Sobell and Sobell [37], but specifically, it is recommended that future studies assessing specific  
20 maternal drinking behaviors should report at least the following (see below for the recommended  
21 approach in each case):  
22  
23  
24  
25  
26  
27  
28

- 29 (i) how the sample was selected (e.g., retrospective) and which method was used (e.g.,  
30 convenience sampling method),  
31  
32
- 33 (ii) the maternal characteristics variables (e.g., age, descent, educational level),  
34  
35
- 36 (iii) which method (or specific questions) was used to assess maternal alcohol consumption (e.g.,  
37 alcohol timeline follow back approach),  
38  
39
- 40 (iv) the timing of exposure when assessing maternal alcohol consumption (e.g., first trimester  
41 pregnancy),  
42  
43
- 44 (v) the frequency of exposure when assessing maternal alcohol consumption (e.g., number of  
45 exposure sessions per week or month),  
46  
47
- 48 (vi) the amount of alcohol consumed per exposure session [36],  
49  
50
- 51 (vii) the sample size,  
52  
53  
54  
55  
56  
57  
58  
59  
60

- 1  
2  
3 (viii) what was considered as one standard drink using International System of Units (i.e. grams or  
4 milliliters of alcohol),  
5  
6  
7 (ix) if discontinuous (categorical) measures cannot be avoided, clear justification of the  
8 employed cut-offs.  
9  
10  
11  
12  
13

14 The third recommendation refers to the complexity of exploring the association between maternal  
15 alcohol consumption and filial FASD. One cannot recruit children with FASD and then proceed to select  
16 children without FASD. This is not helpful because the *number* of children without FASD but with parents  
17 with matched alcohol consumption patterns is the variable of interest. The proportion of children with  
18 FASD within each group of parents with a given alcohol consumption pattern is the dependent variable  
19 to measure. For example, let us assume that in the left panel of Figure 1 (showing the sigmoid  
20 relationship), the probability of FASD is 1% if alcohol consumption is lower than 5 units; 25% if alcohol  
21 consumption is between 5 and 10 units; 75% if alcohol consumption is between 10 and 15 units; and 99%  
22 if alcohol consumption exceeds 15 units. Similarly, let us assume that in the right panel (showing the  
23 linear relationship), the probability of FASD is 12.5% if alcohol consumption is lower than 5 units; 37.5%  
24 if alcohol consumption is between 5 and 10 units; 62.5% if alcohol consumption is between 10 and 15  
25 units; and 87.5% if alcohol consumption exceeds 15 units. This means that for 1000 parents consuming  
26 between 0 and 5 units (the yellow area), in the sigmoid scenario, 10 children will develop FASD and 990  
27 (99 times more) will not, while in the linear scenario, 125 children develop FASD and 875 will not (7 times  
28 more). Now, imagine that a researcher visits a school and screens all children for FASD, and 10 children  
29 screen positive for FASD. For simplicity's sake, let us assume that the parents of all these children  
30 happened to consume less than 5 units per week during pregnancy. Now, this researcher will not know  
31 whether to create a matched control group that is 99 times larger (as would be the case in the sigmoid  
32 scenario) or 7 times larger (as would be the case in the linear scenario). It is exactly the relative sizes of  
33  
34  
35  
36  
37  
38  
39  
40  
41  
42  
43  
44  
45  
46  
47  
48  
49  
50  
51  
52  
53  
54  
55  
56  
57  
58  
59  
60

1  
2  
3 these groups that is the variable to measure, and the only way to do so is to measure both maternal  
4  
5 alcohol consumption patterns and filial FASD in a large sample.  
6  
7

8 Based on these recommendations, the ideal design would be a large-scale<sup>1</sup> prospective study where  
9  
10 maternal and paternal alcohol consumption patterns would be assessed both using self-reports (conform  
11  
12 the recommendations made earlier) as well as objective measures such as biomarkers for alcohol  
13  
14 consumption [38]. Infants would then be assessed for FASD according to the revised IOM guidelines [1]  
15  
16 and other recommendations provided by Roozen et al. [6], and the FASD prevalence would be related to  
17  
18 alcohol consumption patterns of both parents separate and in conjunction. This design also enables  
19  
20 examination of potential confounders such as social economic status or age. Such an ideal design may  
21  
22 not always be feasible. After all, learning about the association of parental drinking patterns to filial FASD  
23  
24 requires assessing drinking patterns in all pregnancies: it is not possible to start from identified FASD  
25  
26 cases, as we explained earlier. However, even when other designs are utilized, it is important that  
27  
28 researchers anticipate data aggregation over studies, and therefore attempt to provide alcohol measures  
29  
30 in metric units.  
31  
32  
33  
34  
35

36 The present review focused on reported data on maternal drinking behaviors. Some of the included  
37  
38 studies also reported paternal drinking patterns or grandparental drinking patterns. The role of paternal  
39  
40 drinking and transgenerational toxicity on fetal development and FASD is not well understood. A recent  
41  
42 review study by Gupta and colleagues [19] reported that paternal alcoholism alters the gene expression  
43  
44 for fetal susceptibility to FAS. In another review, Resendiz and colleagues [20] argue that  
45  
46 transgenerational toxicity may play a role in FASD etiology. Moreover, social facilitation by paternal  
47  
48  
49

---

50  
51 <sup>1</sup> Note that what constitutes “large-scale” depends on the expected FASD prevalence in a population as well as the  
52  
53 target behavior under investigation, e.g. abstinence versus moderated drinking, or abstinence versus regular  
54  
55 drinking patterns. These two parameters determine the effect size of the association that is to be estimated, which  
56  
57 in turn enables computation of the required sample size for accurate estimation of that effect size using Accuracy in  
58  
59 Parameter Estimation (AIPE) methods.  
60

1  
2  
3 drinking is significantly associated with maternal drinking [39]. The origin of FASD is therefore not only  
4  
5 based on maternal drinking behaviors but by many other factors (e.g., genetic and epigenetic  
6  
7 predisposition, maternal body makeup, and lifestyle). Gupta and colleagues [19] emphasized that FAS  
8  
9 etiology, and also other diagnosis within the FASD spectrum, is based on a complex interaction of  
10  
11 different factors whereby cautious interpretation is warranted.  
12  
13  
14  
15

## 16 **Conclusion**

17  
18  
19  
20 The current knowledge on maternal alcohol drinking behaviors in relation to FASD is limited. Behaviors  
21  
22 were measured using various techniques and operationalized differently. For evidence-based preventive  
23  
24 measures it is necessary to identify which prenatal alcohol drinking behavior(s) are most in need of  
25  
26 intervention. Several recommendations have been made that can facilitate accumulation of evidence  
27  
28 over studies. Following these recommendations can contribute to establishing the evidence base  
29  
30 required for the development of effective preventive health promoting programs.  
31  
32  
33  
34  
35  
36  
37  
38  
39  
40  
41  
42  
43  
44  
45  
46  
47  
48  
49  
50  
51  
52  
53  
54  
55  
56  
57  
58  
59  
60

### **Funding**

This research received no specific grant from any funding agency in the public, commercial or not-for-profit sectors.

### **Competing interests**

None declared.

### **Contributors**

Authors SR, GJYP, GK, LC designed the study and directed its implementation, including quality assurance and control. Authors DT, JN, and GK helped supervising the field activities. Authors SR and GJYP conducted the literature review and analyses and prepared the Materials and Methods and the Discussion sections of the text. All other co-authors contributed to successive drafts. All authors gave significant input in preparation of the article and approved the manuscript and submission.

### **Availability of data and materials**

All data, analysis scripts, and other materials are publicly available at the Open Science Framework repository for this study (<https://osf.io/whq45/>).

## References

- 1 Hoyme, H.E., Kalberg, W.O., Elliott, A.J., Blankenship, J., Buckley, D., Marais, A.S., Manning, M.A., Robinson, L.K., Adam, M.P., Abdul-Rahman, O. and Jewett T. Updated Clinical Guidelines for Diagnosing Fetal Alcohol Spectrum Disorders. *Pediatrics* 2016;**138**.
- 2 American Psychiatric Association. *Diagnostic and statistical manual of mental disorders (DSM-5)*. Washington DC: 2013.
- 3 BMA Board of Science. *Fetal alcohol spectrum disorders A guide for healthcare professionals Fetal alcohol spectrum disorders A guide for healthcare professionals*. British Medical Association 2007.
- 4 May P a, Gossage JP, Kalberg WO, *et al*. Prevalence and epidemiologic characteristics of FASD from various research methods with an emphasis on recent in-school studies. *Dev Disabil Res Rev* 2009;**15**:176–92. doi:10.1002/ddrr.68
- 5 Popova S, Lange S, Probst C, *et al*. Estimation of national, regional, and global prevalence of alcohol use during pregnancy and fetal alcohol syndrome: a systematic review and meta-analysis. *Lancet Glob Heal* 2017;:1–10. doi:10.1016/S2214-109X(17)30021-9
- 6 Roozen S, Peters G-JY, Kok G, *et al*. Worldwide Prevalence of Fetal Alcohol Spectrum Disorders: A Systematic Literature Review Including Meta-Analysis. *Alcohol Clin Exp Res* 2016;**40**:18–32. doi:10.1111/acer.12939
- 7 Esper LH, Furtado EF. Identifying maternal risk factors associated with Fetal Alcohol Spectrum Disorders: a systematic review. *Eur Child Adolesc Psychiatry* Published Online First: 2014. doi:10.1007/s00787-014-0603-2
- 8 May PA, Tabachnick BG, Gossage JP, *et al*. Maternal risk factors predicting child physical

- 1  
2  
3 characteristics and dysmorphology in fetal alcohol syndrome and partial fetal alcohol  
4  
5 syndrome. *Drug Alcohol Depend* 2011;**119**:18–27. doi:10.1016/j.drugalcdep.2011.05.009  
6  
7  
8 9 Cannon MJ, Dominique Y, O’Leary L a, *et al*. Characteristics and behaviors of mothers who  
9  
10 have a child with fetal alcohol syndrome. *Neurotoxicol Teratol* 2012;**34**:90–5.  
11  
12 doi:10.1016/j.ntt.2011.09.010  
13  
14  
15 10 Henderson J, Gray R, Brocklehurst P. Systematic review of effects of low-moderate  
16  
17 prenatal alcohol exposure on pregnancy outcome. *BJOG An Int J Obstet Gynaecol*  
18  
19 2007;**114**:243–52. doi:10.1111/j.1471-0528.2006.01163.x  
20  
21  
22 11 Flak AL, Su S, Bertrand J, *et al*. The association of mild, moderate, and binge prenatal  
23  
24 alcohol exposure and child neuropsychological outcomes: a meta-analysis. *Alcohol Clin*  
25  
26 *Exp Res* 2014;**38**:214–26. doi:10.1111/acer.12214  
27  
28  
29  
30 12 Davis P, Partridge J, Storrs C. Alcohol consumption in pregnancy. How much is safe? *Arch*  
31  
32 *Dis Child* 1982;**28**:940–3.  
33  
34  
35 13 BMA Board of Science. Alcohol and pregnancy Preventing and managing fetal alcohol  
36  
37 spectrum disorders. 2016.  
38  
39  
40 14 Sullivan EV, Pfefferbaum A. Fetal alcohol spectrum disorder: pathogenesis and  
41  
42 mechanisms. *Alcohol Nerv Syst Handb Clin Neurol* 2014;**125**.  
43  
44  
45 15 Ramsay M. Genetic and epigenetic insights into fetal alcohol spectrum disorders. *Genome*  
46  
47 *Med* 2010;**2**:27. doi:10.1186/gm148  
48  
49  
50 16 Ehrhart F, Roozen S, Verbeek J, *et al*. Review and gap analysis : molecular pathways  
51  
52 leading to fetal alcohol spectrum disorders. *Mol Psychiatry* Published Online First: 2018.  
53  
54 doi:10.1038/s41380-018-0095-4  
55  
56  
57  
58  
59  
60

- 1  
2  
3 17 Jonsson E, Salmon A, Warren KR. The international charter on prevention of fetal alcohol  
4 spectrum disorder. *Lancet Glob Heal* 2014;**2**:e135-7. doi:10.1016/S2214-109X(13)70173-6  
5  
6  
7  
8 18 WHO. Guidelines for the identification and management of substance use and substance  
9 use disorders in pregnancy. Geneva: 2014.  
10  
11  
12  
13 19 Gupta KK, Gupta VK, Shirasaka T. An Update on Fetal Alcohol Syndrome - Pathogenesis,  
14 Risks, and Treatment. *Alcohol Clin Exp Res* 2016;**40**:1594–602. doi:10.1111/acer.13135  
15  
16  
17  
18 20 Resendiz M, Chen Y, Öztürk NC, *et al.* Epigenetic medicine and fetal alcohol spectrum  
19 disorders Marisol. *Epigenomics* 2013;**5**:73–86. doi:10.2217/epi.12.80.Epigenetic  
20 disorders  
21  
22  
23 21 Kok G, Gottlieb NH, Peters GY, *et al.* A taxonomy of behavior change methods: an  
24 Intervention Mapping approach. *Health Psychol Rev* 2016;**10**:297–312.  
25  
26  
27  
28 doi:10.1080/17437199.2015.1077155  
29  
30  
31 22 May PA, Gossage JP. Maternal Risk Factors for Fetal Alcohol Spectrum Disorders: Not As  
32 Simple As It Might Seem. *Alcohol Res Heal* 2011;**34**:15–26.  
33  
34  
35 23 Strecher VJ, Seijts GH, Kok GJ, *et al.* Goal Setting as a Strategy for Health Behavior Change.  
36  
37  
38 *Heal Educ Behav* 1995;**22**:190–200. doi:10.1177/109019819502200207  
39  
40  
41 24 Moher D, Liberati A, Tetzlaff J, *et al.* Preferred reporting items for systematic reviews and  
42 meta-analyses: the PRISMA statement. *Ann Intern Med* 2009;**151**:264–9.  
43  
44  
45  
46 doi:10.1371/journal.pmed1000097  
47  
48  
49 25 R Development Core Team. R: A Language and Environment for Statistical Computing.  
50 2014.  
51  
52 26 Wells GA, Shea B, O’Connell D, *et al.* The Newcastle-Ottawa Scale (NOS) for assessing the  
53 quality of nonrandomized studies in meta-analyses. 2013. doi:10.2307/632432  
54  
55  
56  
57  
58  
59  
60



- 1  
2  
3 27 Viechtbauer W. Conducting Meta-Analyses in R with the metafor package. *J Stat Softw*  
4  
5 2010;**36**:1–48.  
6  
7  
8 28 May P a, Hamrick KJ, Corbin KD, *et al.* Dietary Intake, Nutrition, and Fetal Alcohol  
9  
10 Spectrum Disorders in the Western Cape Province of South Africa. *Reprod Toxicol*  
11  
12 Published Online First: February 2014. doi:10.1016/j.reprotox.2014.02.002  
13  
14  
15 29 DeCoster J, Iselin A-MR, Gallucci M. A conceptual and empirical examination of  
16  
17 justifications for dichotomization. *Psychol Methods* 2009;**14**:349–66.  
18  
19 doi:10.1037/a0016956  
20  
21  
22 30 MacCallum RC, Zhang S, Preacher KJ, *et al.* On the practice of dichotomization of  
23  
24 quantitative variables. *Psychol Methods* 2002;**7**:19–40. doi:10.1037//1082-989X.7.1.19  
25  
26  
27 31 Altman DG, Royston P. The cost of dichotomising continuous variables. *BMJ*  
28  
29 2006;**332**:1080. doi:10.1136/bmj.332.7549.1080  
30  
31  
32 32 Mamluk L, Edwards HB, Savovic J, *et al.* Low alcohol consumption and pregnancy and  
33  
34 childhood outcomes: time to change guidelines indicating apparently ‘safe’ levels of  
35  
36 alcohol during pregnancy? A systematic review and meta-analyses. *BMJ Open*  
37  
38 2017;**7**:e015410. doi:10.1136/bmjopen-2016-015410  
39  
40  
41  
42 33 Peters G-JY, Crutzen R. Establishing determinant importance using CIBER: an introduction  
43  
44 and tutorial. *Eur Heal Psychol* 2018;**20**.  
45  
46  
47 34 Crutzen R, Peters G-JYG-JY. Evolutionary learning processes as the foundation for  
48  
49 behaviour change. *Health Psychol Rev* 2018;**12**:43–57.  
50  
51 doi:10.1080/17437199.2017.1362569  
52  
53  
54 35 Roozen S, Black D, Peters G-JY, *et al.* Fetal Alcohol Spectrum Disorders (FASD): an  
55  
56  
57  
58  
59  
60

1  
2  
3 Approach to Effective Prevention. *Curr Dev Disord Reports* 2016;;10–5.

4  
5  
6 doi:10.1007/s40474-016-0101-y

7  
8 36 Dawson DA. Methodological issues in measuring alcohol use. *Alcohol Res Heal*  
9  
10 2003;**27**:18–29.

11  
12 37 Sobell LC, Sobell MB. Alcohol consumption measures. In: *Assessing alcohol problems: A*  
13  
14 *guide for clinicians and researchers*. 1995. 75–99.

15  
16 38 Chabenne A, Moon C, Ojo C, *et al*. Biomarkers in fetal alcohol syndrome. *Biomarkers*  
17  
18 *Genomic Med* 2014;**6**:12–22. doi:10.1016/j.bgm.2014.01.002

19  
20 39 McBride N, Johnson S. Fathers' Role in Alcohol-Exposed Pregnancies. Systematic Review  
21  
22 of Human Studies. *Am J Prev Med* 2016;;1–9. doi:10.1016/j.amepre.2016.02.009

23  
24 40 Ceccanti M, Fiorentino D, Coriale G, *et al*. Maternal risk factors for fetal alcohol spectrum  
25  
26 disorders in a province in Italy. *Drug Alcohol Depend* 2014;**145**:201–8.

27  
28  
29  
30  
31  
32  
33  
34  
35  
36  
37  
38  
39  
40  
41  
42  
43  
44  
45  
46  
47  
48  
49  
50  
51  
52  
53  
54  
55  
56  
57  
58  
59  
60  
doi:10.1016/j.drugalcdep.2014.10.017

41  
42  
43  
44  
45  
46  
47  
48  
49  
50  
51  
52  
53  
54  
55  
56  
57  
58  
59  
60  
Coyne KL, de Costa CM, Heazlewood RJ, *et al*. Pregnancy characteristics of women giving  
birth to children with fetal alcohol syndrome in Far North Queensland. *Aust N Z J Obstet*  
*Gynaecol* 2008;**48**:240–7. doi:10.1111/j.1479-828X.2008.00861.x

42  
43  
44  
45  
46  
47  
48  
49  
50  
51  
52  
53  
54  
55  
56  
57  
58  
59  
60  
Davies L, Dunn M, Chersich M, *et al*. Developmental delay of infants and young children  
with and without fetal alcohol spectrum disorder in the Northern Cape Province, South  
Africa. *African J Psychiatry (South Africa)* 2011;**14**:298–305. doi:10.4314/ajpsy.v14i4.7

43  
44  
45  
46  
47  
48  
49  
50  
51  
52  
53  
54  
55  
56  
57  
58  
59  
60  
May PA, Brooke L, Gossage JP, *et al*. Epidemiology of fetal alcohol syndrome in a South  
African community in the Western Cape Province. *Am J Public Health* 2000;**90**:1905–12.  
doi:10.2105/ajph.90.12.1905

- 1  
2  
3 44 May PA, Gossage JP, Brooke LE, *et al.* Maternal risk factors for fetal alcohol syndrome in  
4 the Western Cape Province of South Africa: A population-based study. *Am J Public Health*  
5 2005;**95**:1190–9. doi:10.2105/AJPH.2003.037093  
6  
7  
8  
9  
10 45 May P a, Gossage JP, Marais A-S, *et al.* The epidemiology of fetal alcohol syndrome and  
11 partial FAS in a South African community. *Drug Alcohol Depend* 2007;**88**:259–71.  
12 doi:10.1016/j.drugalcdep.2006.11.007  
13  
14  
15  
16  
17 46 May PA, Gossage JP, Marais A-S, *et al.* Maternal risk factors for fetal alcohol syndrome  
18 and partial fetal alcohol syndrome in South Africa: a third study. *Alcohol Clin Exp Res*  
19 2008;**32**:738–53. doi:10.1111/j.1530-0277.2008.00634.x  
20  
21  
22  
23  
24  
25 47 May P a, Fiorentino D, Coriale G, *et al.* Prevalence of children with severe fetal alcohol  
26 spectrum disorders in communities near Rome, Italy: new estimated rates are higher than  
27 previous estimates. *Int J Environ Res Public Health* 2011;**8**:2331–51.  
28 doi:10.3390/ijerph8062331  
29  
30  
31  
32  
33  
34  
35 48 May PA, Blankenship J, Marais AS, *et al.* Maternal alcohol consumption producing fetal  
36 alcohol spectrum disorders (FASD): Quantity, frequency, and timing of drinking. *Drug*  
37 *Alcohol Depend* 2013;**133**:502–12. doi:10.1016/j.drugalcdep.2013.07.013  
38  
39  
40  
41  
42 49 May PA, Blankenship J, Marais AS, *et al.* Approaching the Prevalence of the Full Spectrum  
43 of Fetal Alcohol Spectrum Disorders in a South African Population-Based Study. *Alcohol*  
44 *Clin Exp Res* 2013;**37**:818–30. doi:10.1111/acer.12033  
45  
46  
47  
48  
49 50 May P a, Baete A, Russo J, *et al.* Prevalence and characteristics of fetal alcohol spectrum  
50 disorders. *Pediatrics* 2014;**134**:855–66. doi:10.1542/peds.2013-3319  
51  
52  
53  
54 51 May P, De Vries M, Marais A-S, *et al.* Replication of High Fetal Alcohol Spectrum Disorders  
55  
56  
57  
58  
59  
60

- 1  
2  
3 Prevalence Rates, Child Characteristics, and Maternal Risk Factors in a Second Sample of  
4 Rural Communities in South Africa. *Int J Environ Res Public Health* 2017;**14**:522.  
5  
6  
7  
8 doi:10.3390/ijerph14050522  
9
- 10 52 Miller LA, Shaikh T, Stanton C, *et al.* Surveillance for fetal alcohol syndrome in Colorado.  
11  
12 *Public Heal Rep* 1995;**110**:690–7.  
13  
14
- 15 53 O’Leary CM, Nassar N, Kurinczuk JJ, *et al.* Prenatal alcohol exposure and risk of birth  
16  
17 defects. *Pediatrics* 2010;**126**:e843-50. doi:10.1542/peds.2010-0256  
18  
19
- 20 54 Petković G, Barišić I. Prevalence of fetal alcohol syndrome and maternal characteristics in  
21  
22 a sample of schoolchildren from a rural province of Croatia. *Int J Environ Res Public Health*  
23  
24 2013;**10**:1547–61. doi:10.3390/ijerph10041547  
25  
26
- 27 55 Suttie M, Foroud T, Wetherill L, *et al.* Facial Dysmorphism Across the Fetal Alcohol  
28  
29 Spectrum. *Pediatrics* 2013;**131**:788. doi:peds.2012-1371 [pii]\r10.1542/peds.2012-1371  
30  
31
- 32 56 Urban M, Chersich MF, Fourie L-A, *et al.* Fetal alcohol syndrome among grade 1  
33  
34 schoolchildren in Northern Cape Province: prevalence and risk factors. *S Afr Med J*  
35  
36 2008;**98**:877–82.  
37  
38
- 39 57 Viljoen D, Croxford J, Gossage JP, *et al.* Characteristics of Mothers of Children with Fetal  
40  
41 Alcohol Syndrome in the Western Cape Province of South Africa: A Case Control Study. *J*  
42  
43 *Stud Alcohol* 2002;**63**:6–17.  
44  
45
- 46 58 Viljoen DL, Gossage JP, Brooke L, *et al.* Fetal Alcohol Syndrome Epidemiology in a South  
47  
48 African Community : A Second Study of a Very High Prevalence Area. *J Stud Alcohol*  
49  
50 2005;**66**:593.  
51  
52  
53  
54  
55  
56  
57  
58  
59  
60

1  
2  
3  
4  
5  
6  
7  
8  
9  
10  
11  
12  
13  
14  
15  
16  
17  
18  
19  
20  
21  
22  
23  
24  
25  
26  
27  
28  
29  
30  
31  
32  
33  
34  
35  
36  
37  
38  
39  
40  
41  
42  
43  
44  
45  
46  
47  
48  
49  
50  
51  
52  
53  
54  
55  
56  
57  
58  
59  
60

For peer review only

1  
2  
3 **Figure captions:**  
4

5 Figure 1. Two examples of possible dose-response relationships between maternal alcohol consumption  
6 and probability of filial FASD.  
7

8  
9 Figure 2. Flow chart of publications measuring maternal behavior(s) related to FASD included in the  
10 review. Details regarding the screening procedure and number of exclusions per exclusion criterion can  
11 be inspected at resource 2.  
12  
13  
14  
15  
16  
17  
18  
19  
20  
21  
22  
23  
24  
25  
26  
27  
28  
29  
30  
31  
32  
33  
34  
35  
36  
37  
38  
39  
40  
41  
42  
43  
44  
45  
46  
47  
48  
49  
50  
51  
52  
53  
54  
55  
56  
57  
58  
59  
60

For peer review only

**Table 1.** Overview of characteristics of included studies in this review

| Authors (year)                 | Geography     | Sample year | Cases                    | Controls | Assessment methods   | Number of measurement levels <sup>1</sup> |      |      |       | NOS score <sup>2</sup> |
|--------------------------------|---------------|-------------|--------------------------|----------|----------------------|-------------------------------------------|------|------|-------|------------------------|
|                                |               |             |                          |          |                      | Dich.                                     | Nom. | Ord. | Cont. |                        |
| 1 Cannon and colleagues[9]     | United States | 1995-1997   | 353                      | 3894874  | record documentation | 1                                         |      | 2    |       | 4                      |
| 2 Ceccanti and colleagues [40] | Italy         | 2014        | 39                       | 108      | interview            | 1                                         |      |      | 6     | 9                      |
| 3 Coyne and colleagues[41]     | Australia     | 1994-2006   | 54                       | 56       | self-report          |                                           |      | 2    |       | 5                      |
| 4 Davies and colleagues [42]   | South Africa  | 2002-2003   | 39                       | 36       | interview            |                                           | 1    |      |       | 6                      |
| 5 May and colleagues[43]       | South Africa  |             | 46                       | 42       | interview            |                                           |      | 4    |       | 6                      |
| 6 May and colleagues [44]      | South Africa  | 1999-2001   | 53                       | 116      | interview            |                                           |      | 4    |       | 7                      |
| 7 May and colleagues [45]      | South Africa  |             | 61                       | 133      | interview            | 5                                         |      |      |       | 7                      |
| 8 May and colleagues[46]       | South Africa  | 2002        | 49 FAS, 15 pFAS          | 133      | interview            | 1                                         |      | 4    | 7     | 6                      |
| 9 May and colleagues [47]      | Italy         | 2011        | 8 FAS, 34 pFAS, 30 FASD  | 122      | interview            | 4                                         |      |      |       | 9                      |
| 10 May and colleagues [48]     | South Africa  | 2013        | 63 FAS, 48 pFAS, 32 ARND | 81       | interview            | 4                                         |      |      |       | 7                      |

|    |    |                            |               |           |                           |        |             |           |   |   |
|----|----|----------------------------|---------------|-----------|---------------------------|--------|-------------|-----------|---|---|
| 1  |    |                            |               |           |                           |        |             |           |   |   |
| 2  |    |                            |               |           |                           |        |             |           |   |   |
| 3  |    |                            |               |           |                           |        |             |           |   |   |
| 4  | 11 | May and colleagues[49]     | South Africa  | 2013      | 68 FAS, 52 pFAS, 35 ARND  | 90     | interview   | 7         | 1 | 7 |
| 5  |    |                            |               |           |                           |        |             |           |   |   |
| 6  |    |                            |               |           |                           |        |             |           |   |   |
| 7  | 12 | May and colleagues[50]     | United States | 2010-2011 | 30                        |        | 80          | interview | 2 | 4 |
| 8  |    |                            |               |           |                           |        |             |           |   | 7 |
| 9  |    |                            |               |           |                           |        |             |           |   |   |
| 10 | 13 | May and colleagues[28]     | South Africa  |           | 43                        |        | 85          | interview | 5 | 7 |
| 11 |    |                            |               |           |                           |        |             |           |   |   |
| 12 |    |                            |               |           |                           |        |             |           |   |   |
| 13 | 14 | May and colleagues[51]     | South Africa  | 2011      | 118 FAS, 91 pFAS, 55 ARND | 100    | interview   | 11        | 8 | 7 |
| 14 |    |                            |               |           |                           |        |             |           |   |   |
| 15 | 15 | Miller and colleagues[52]  | United States | 1992-1994 | 22                        | 214499 | unknown     |           | 1 | 7 |
| 16 |    |                            |               |           |                           |        |             |           |   |   |
| 17 | 16 | O'Leary and colleagues[53] | Australia     | 1995-1997 |                           |        | self-report |           | 3 | 6 |
| 18 |    |                            |               |           |                           |        |             |           |   |   |
| 19 | 17 | Petković and Barišić[54]   | Croatia       |           | 55                        | 769    | self-report | 5         |   | 7 |
| 20 |    |                            |               |           |                           |        |             |           |   |   |
| 21 | 18 | Suttie and colleagues [55] | South Africa  | 2013      | 22 FAS, 26 pFAS           | 69     | interview   |           | 3 | 5 |
| 22 |    |                            |               |           |                           |        |             |           |   |   |
| 23 | 19 | Urban and colleagues[56]   | South Africa  | 2001-2004 | 82                        |        | 74          | interview | 1 | 6 |
| 24 |    |                            |               |           |                           |        |             |           |   |   |
| 25 | 20 | Viljoen and colleagues[57] | South Africa  | 2001      | 31                        |        | 31          | interview |   | 4 |
| 26 |    |                            |               |           |                           |        |             |           |   | 6 |
| 27 | 21 | Viljoen and colleagues[58] | South Africa  | 2005      | 53                        |        | 116         | interview | 5 | 7 |
| 28 |    |                            |               |           |                           |        |             |           |   |   |
| 29 |    |                            |               |           |                           |        |             |           |   |   |
| 30 |    |                            |               |           |                           |        |             |           |   |   |
| 31 |    |                            |               |           |                           |        |             |           |   |   |
| 32 |    |                            |               |           |                           |        |             |           |   |   |
| 33 |    |                            |               |           |                           |        |             |           |   |   |
| 34 |    |                            |               |           |                           |        |             |           |   |   |
| 35 |    |                            |               |           |                           |        |             |           |   |   |
| 36 |    |                            |               |           |                           |        |             |           |   |   |

note <sup>1</sup>measurements of maternal alcohol drinking behavior are categorized in three different levels: dichotomous ('Dich.', e.g., yes/no), nominal ('Nom.', e.g., admitted, negative, unanswered), ordinal ('Ord.', e.g., < 4 drinks, > 4 drinks), continuous ('Cont.', e.g., %). The measures represent the different questions asked for each category (e.g., "drank during the first trimester of pregnancy"). <sup>2</sup>Each study was assessed using the adapted version of the Newcastle – Ottawa Scale (NOS). Scores were allocated from a scale from 0 (poor quality) to a maximum of 10 stars (excellent quality). For more detailed information see resource 5.



**Table 2.** Conclusions made by authors of included studies on maternal drinking behaviors and FASD

| Authors (year)                      | Original authors' conclusions                                                                                                                                                                                                                                                                                                                                                                                                                     |
|-------------------------------------|---------------------------------------------------------------------------------------------------------------------------------------------------------------------------------------------------------------------------------------------------------------------------------------------------------------------------------------------------------------------------------------------------------------------------------------------------|
| <i>Cannon and colleagues</i> [9]    | "Mothers of children with FAS have severe substance abuse behaviors including daily drinking, binge drinking"                                                                                                                                                                                                                                                                                                                                     |
| <i>Ceccanti and colleagues</i> [40] | "Mothers of children with a FASD reported more drinking three months prior to pregnancy, more current drinking, and endorsed questionnaire items indicating that solitary drinking was more common"                                                                                                                                                                                                                                               |
| <i>Coyne and colleagues</i> [41]    | "Mothers of children with FAS reported heavy alcohol intake during pregnancy"                                                                                                                                                                                                                                                                                                                                                                     |
| <i>Davies and colleagues</i> [42]   | "Twenty five mothers with a FASD diagnosed child (69%) reported drinking alcohol, on average, every week during their pregnancy"                                                                                                                                                                                                                                                                                                                  |
| <i>May and colleagues</i> [43]      | "Most drinking is binge drinking. Even though the current drinking quantities reported by both subjects and controls were not high in absolute standards, the most important interpretation of the data is the large differential between subjects and controls. There is no doubt, however, that these mothers drank sufficiently to produce verifiable cases of fetal alcohol syndrome as severe as we have seen anywhere in the United States" |
| <i>May and colleagues</i> [44]      | "Alcohol consumption was much greater for case mothers than for control mothers in all comparisons. Control mothers were more likely to have been abstainers or Light drinkers compared with case mothers, who showed significantly heavier drinking patterns and reported drinking at the same level (53%-55%) or higher during pregnancy (32%-34%) compared with current drinking levels"                                                       |
| <i>May and colleagues</i> [45]      | "Measures of drinking during the index pregnancies are significantly associated with low intelligence and frequent behavioral problems in the children. Reported drinking during pregnancy (.59), drinks per day (.48), three drinks or more per occasion (.51), and five drinks or more per occasion (.45), correlate highly with total dysmorphism in the children"                                                                             |
| <i>May and colleagues</i> [46]      | "In most every variable of maternal alcohol use and abuse, a spectrum emerged based on the final diagnosis of the child with FAS, PFAS, and control. Alcohol use was greatest in quantity, frequency, and duration among the mothers of FAS children, and generally next most severe among mothers of PFAS children, while lowest among controls"                                                                                                 |
| <i>May and colleagues</i> [47]      | "Mothers of children with FASD report heavy current drinking and drinking during the 2nd and 3rd trimesters of the index pregnancy"                                                                                                                                                                                                                                                                                                               |
| <i>May and colleagues</i> [48]      | "Binge drinking of at least two days a week during all trimesters in this population may produce FAS or PFAS, while mothers of children with ARND and exposed children without an FASD are most likely to reduce their average and peak alcohol consumption in the later trimesters"                                                                                                                                                              |

|    |                                    |                                                                                       |
|----|------------------------------------|---------------------------------------------------------------------------------------|
| 1  |                                    |                                                                                       |
| 2  |                                    |                                                                                       |
| 3  |                                    |                                                                                       |
| 4  |                                    | "Mean number of drinks per week and drinking 3 and 5 or more drinks per occasion      |
| 5  |                                    | during pregnancy both illustrate the significant difference between mothers of        |
| 6  | <i>May and colleagues</i> [49]     | FASD children and those of normal children"                                           |
| 7  |                                    |                                                                                       |
| 8  |                                    | "Mothers of children who had a FASD reported more drinking 3 months before            |
| 9  | <i>May and colleagues</i> [50]     | pregnancy, and heavy drinking by the father of children who had FASD"                 |
| 10 |                                    | "With patterns of heavy episodic (binge) drinking being the most harmful to the       |
| 11 | <i>May and colleagues</i> [28]     | fetus"                                                                                |
| 12 |                                    | "Outcomes, both physical and cognitive/behavioral, are especially poor among          |
| 13 |                                    | children who were exposed to the highest quantity and frequency of drinking,          |
| 14 |                                    | especially drinks per drinking day and three or more drinks per occasion in both the  |
| 15 | <i>May and colleagues</i> [51]     | case control comparisons and the correlation analysis"                                |
| 16 |                                    |                                                                                       |
| 17 |                                    |                                                                                       |
| 18 | <i>Miller and colleagues</i> [52]  | "Mothers of FAS cases were more likely to drink alcohol during pregnancy"             |
| 19 |                                    |                                                                                       |
| 20 |                                    | "Heavy PAE in the first trimester was associated with a more than fourfold            |
| 21 |                                    | increased risk of ARBDs. This association was specific to PAE in the first trimester. |
| 22 |                                    | The finding of twofold increased odds of ARBDs after moderate levels of PAE during    |
| 23 | <i>O'Leary and</i>                 | late pregnancy is likely because many women also had heavy first trimester            |
| 24 | <i>colleagues</i> [53]             | exposure and reduced their alcohol intake as pregnancy progressed"                    |
| 25 |                                    |                                                                                       |
| 26 |                                    |                                                                                       |
| 27 |                                    | "Confirmed pregnancy alcohol consumption in the FAS/PFAS group was higher             |
| 28 | <i>Petković and Barišić</i> [54]   | (18.2%) to observed frequency in the whole sample of questioned mothers (11.5%)       |
| 29 |                                    | and significantly higher when compared to non-FAS/PFAS mothers (10.4%)"               |
| 30 |                                    |                                                                                       |
| 31 |                                    | "No differences were found for prenatal alcohol exposure between the HE               |
| 32 |                                    | subgroup with FAS/PFAS affinity (nonsyndromal heavy exposed with FAS/PFAS-like        |
| 33 |                                    | face signature [HE1]) versus the HE subgroup with control affinity (nonsyndromal      |
| 34 | <i>Suttie and colleagues</i> [55]  | heavy exposed with more control-like face signature [HE2]) (P < .10)"                 |
| 35 |                                    |                                                                                       |
| 36 |                                    |                                                                                       |
| 37 | <i>Urban and colleagues</i> [56]   | "Maternal drinking during pregnancy was much more frequently reported in              |
| 38 |                                    | mothers of children with FAS/PFAS than in controls"                                   |
| 39 |                                    |                                                                                       |
| 40 |                                    | "Mothers of children with FAS drank significantly heavier than controls, especially   |
| 41 |                                    | for continues drinking heavily (and/or increasing) throughout pregnancy. Control      |
| 42 |                                    | mothers drank less and drinking levels declined during pregnancy. Episodic drinking   |
| 43 | <i>Viljoen and colleagues</i> [57] | on weekends was modal for both groups with bingeing 5+ drinks was normative           |
| 44 |                                    | during 2 constructive days for FAS mothers "                                          |
| 45 |                                    |                                                                                       |
| 46 |                                    | "Mothers of children with FAS drink more than controls, drink rapidly and drink       |
| 47 | <i>Viljoen and colleagues</i> [58] | heavily in an episodic fashion. Moreover, they do not quit or cut down during         |
| 48 |                                    | pregnancy"                                                                            |
| 49 |                                    |                                                                                       |
| 50 |                                    |                                                                                       |
| 51 |                                    |                                                                                       |
| 52 |                                    |                                                                                       |
| 53 |                                    |                                                                                       |
| 54 |                                    |                                                                                       |
| 55 |                                    |                                                                                       |
| 56 |                                    |                                                                                       |
| 57 |                                    |                                                                                       |
| 58 |                                    |                                                                                       |
| 59 |                                    |                                                                                       |
| 60 |                                    |                                                                                       |



Figure 1. Two examples of possible dose-response relationships between maternal alcohol consumption and probability of filial FASD.

119x71mm (300 x 300 DPI)

1  
2  
3  
4  
5  
6  
7  
8  
9  
10  
11  
12  
13  
14  
15  
16  
17  
18  
19  
20  
21  
22  
23  
24  
25  
26  
27  
28  
29  
30  
31  
32  
33  
34  
35  
36  
37  
38  
39  
40  
41  
42  
43  
44  
45  
46  
47  
48  
49  
50  
51  
52

Records identified by query in bibliographic databases at 2015-03-23  
(n = 3047)

- Records excluded based on:
- Duplicates (n = 539)
  - Screening titles (n = 1924)
  - Screening titles and abstracts (n = 385)
  - Screening full text (n = 183)
  - Extraction (n = 10)
  - Extraction (n = 1)

Inspection of inclusions in other review  
(n = 4)

Included after screening  
(n = 20)

Re-ran updated query at 2018-08-27  
(n = 3404)

Articles selected after cursory screening  
(n = 1)

Total number of publications included in the  
systematic literature review  
(n = 21)

## The PRISMA for Abstracts Checklist

| TITLE                                     | CHECKLIST ITEM                                                                                                                                                                                       | REPORTED ON PAGE # |
|-------------------------------------------|------------------------------------------------------------------------------------------------------------------------------------------------------------------------------------------------------|--------------------|
| 1. Title:                                 | Identify the report as a systematic review, meta-analysis, or both.                                                                                                                                  | 1                  |
| <b>BACKGROUND</b>                         |                                                                                                                                                                                                      |                    |
| 2. Objectives:                            | The research question including components such as participants, interventions, comparators, and outcomes.                                                                                           | 4                  |
| <b>METHODS</b>                            |                                                                                                                                                                                                      |                    |
| 3. Eligibility criteria:                  | Study and report characteristics used as criteria for inclusion.                                                                                                                                     | 4                  |
| 4. Information sources:                   | Key databases searched and search dates.                                                                                                                                                             | 4                  |
| 5. Risk of bias:                          | Methods of assessing risk of bias.                                                                                                                                                                   | NA                 |
| <b>RESULTS</b>                            |                                                                                                                                                                                                      |                    |
| 6. Included studies:                      | Number and type of included studies and participants and relevant characteristics of studies.                                                                                                        | 4                  |
| 7. Synthesis of results:                  | Results for main outcomes (benefits and harms), preferably indicating the number of studies and participants for each. If meta-analysis was done, include summary measures and confidence intervals. | 4                  |
| 8. Description of the effect:             | Direction of the effect (i.e. which group is favoured) and size of the effect in terms meaningful to clinicians and patients.                                                                        | NA                 |
| <b>DISCUSSION</b>                         |                                                                                                                                                                                                      |                    |
| 9. Strengths and Limitations of evidence: | Brief summary of strengths and limitations of evidence (e.g. inconsistency, imprecision, indirectness, or risk of bias, other supporting or conflicting evidence)                                    | 5                  |
| 10. Interpretation:                       | General interpretation of the results and important implications                                                                                                                                     | 5                  |
| <b>OTHER</b>                              |                                                                                                                                                                                                      |                    |
| 11. Funding:                              | Primary source of funding for the review.                                                                                                                                                            | NA                 |
| 12. Registration:                         | Registration number and registry name.                                                                                                                                                               | NA                 |

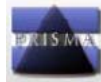

# PRISMA 2009 Checklist

| Section/topic                      | #  | Checklist item                                                                                                                                                                                                                                                                                              | Reported on page # |
|------------------------------------|----|-------------------------------------------------------------------------------------------------------------------------------------------------------------------------------------------------------------------------------------------------------------------------------------------------------------|--------------------|
| <b>TITLE</b>                       |    |                                                                                                                                                                                                                                                                                                             |                    |
| Title                              | 1  | Identify the report as a systematic review, meta-analysis, or both.                                                                                                                                                                                                                                         | 1                  |
| <b>ABSTRACT</b>                    |    |                                                                                                                                                                                                                                                                                                             |                    |
| Structured summary                 | 2  | Provide a structured summary including, as applicable: background; objectives; data sources; study eligibility criteria, participants, and interventions; study appraisal and synthesis methods; results; limitations; conclusions and implications of key findings; systematic review registration number. | 2                  |
| <b>INTRODUCTION</b>                |    |                                                                                                                                                                                                                                                                                                             |                    |
| Rationale                          | 3  | Describe the rationale for the review in the context of what is already known.                                                                                                                                                                                                                              | 4-5                |
| Objectives                         | 4  | Provide an explicit statement of questions being addressed with reference to participants, interventions, comparisons, outcomes, and study design (PICOS).                                                                                                                                                  | 5                  |
| <b>METHODS</b>                     |    |                                                                                                                                                                                                                                                                                                             |                    |
| Protocol and registration          | 5  | Indicate if a review protocol exists, if and where it can be accessed (e.g., Web address), and, if available, provide registration information including registration number.                                                                                                                               | NA                 |
| Eligibility criteria               | 6  | Specify study characteristics (e.g., PICOS, length of follow-up) and report characteristics (e.g., years considered, language, publication status) used as criteria for eligibility, giving rationale.                                                                                                      | 5-6                |
| Information sources                | 7  | Describe all information sources (e.g., databases with dates of coverage, contact with study authors to identify additional studies) in the search and date last searched.                                                                                                                                  | 5-6                |
| Search                             | 8  | Present full electronic search strategy for at least one database, including any limits used, such that it could be repeated.                                                                                                                                                                               | 5                  |
| Study selection                    | 9  | State the process for selecting studies (i.e., screening, eligibility, included in systematic review, and, if applicable, included in the meta-analysis).                                                                                                                                                   | 5-6                |
| Data collection process            | 10 | Describe method of data extraction from reports (e.g., piloted forms, independently, in duplicate) and any processes for obtaining and confirming data from investigators.                                                                                                                                  | 5-6                |
| Data items                         | 11 | List and define all variables for which data were sought (e.g., PICOS, funding sources) and any assumptions and simplifications made.                                                                                                                                                                       | 6                  |
| Risk of bias in individual studies | 12 | Describe methods used for assessing risk of bias of individual studies (including specification of whether this was done at the study or outcome level), and how this information is to be used in any data synthesis.                                                                                      | NA                 |
| Summary measures                   | 13 | State the principal summary measures (e.g., risk ratio, difference in means).                                                                                                                                                                                                                               | 6                  |
| Synthesis of results               | 14 | Describe the methods of handling data and combining results of studies, if done, including measures of consistency (e.g., $I^2$ ) for each meta-analysis.                                                                                                                                                   | 6                  |



# PRISMA 2009 Checklist

| Section/topic                 | #  | Checklist item                                                                                                                                                                                           | Reported on page # |
|-------------------------------|----|----------------------------------------------------------------------------------------------------------------------------------------------------------------------------------------------------------|--------------------|
| Risk of bias across studies   | 15 | Specify any assessment of risk of bias that may affect the cumulative evidence (e.g., publication bias, selective reporting within studies).                                                             | NA                 |
| Additional analyses           | 16 | Describe methods of additional analyses (e.g., sensitivity or subgroup analyses, meta-regression), if done, indicating which were pre-specified.                                                         | 6                  |
| <b>RESULTS</b>                |    |                                                                                                                                                                                                          |                    |
| Study selection               | 17 | Give numbers of studies screened, assessed for eligibility, and included in the review, with reasons for exclusions at each stage, ideally with a flow diagram.                                          | 7                  |
| Study characteristics         | 18 | For each study, present characteristics for which data were extracted (e.g., study size, PICOS, follow-up period) and provide the citations.                                                             | 7                  |
| Risk of bias within studies   | 19 | Present data on risk of bias of each study and, if available, any outcome level assessment (see item 12).                                                                                                | NA                 |
| Results of individual studies | 20 | For all outcomes considered (benefits or harms), present, for each study: (a) simple summary data for each intervention group (b) effect estimates and confidence intervals, ideally with a forest plot. | 7-9                |
| Synthesis of results          | 21 | Present results of each meta-analysis done, including confidence intervals and measures of consistency.                                                                                                  | 7-9                |
| Risk of bias across studies   | 22 | Present results of any assessment of risk of bias across studies (see Item 15).                                                                                                                          | NA                 |
| Additional analysis           | 23 | Give results of additional analyses, if done (e.g., sensitivity or subgroup analyses, meta-regression [see Item 16]).                                                                                    | 7-9                |
| <b>DISCUSSION</b>             |    |                                                                                                                                                                                                          |                    |
| Summary of evidence           | 24 | Summarize the main findings including the strength of evidence for each main outcome; consider their relevance to key groups (e.g., healthcare providers, users, and policy makers).                     | 10                 |
| Limitations                   | 25 | Discuss limitations at study and outcome level (e.g., risk of bias), and at review-level (e.g., incomplete retrieval of identified research, reporting bias).                                            | 10                 |
| Conclusions                   | 26 | Provide a general interpretation of the results in the context of other evidence, and implications for future research.                                                                                  | 10-12              |
| <b>FUNDING</b>                |    |                                                                                                                                                                                                          |                    |
| Funding                       | 27 | Describe sources of funding for the systematic review and other support (e.g., supply of data); role of funders for the systematic review.                                                               | 15                 |

From: Moher D, Liberati A, Tetzlaff J, Altman DG, The PRISMA Group (2009). Preferred Reporting Items for Systematic Reviews and Meta-Analyses: The PRISMA Statement. PLoS Med 6(6): e1000097. doi:10.1371/journal.pmed1000097

For more information, visit: [www.prisma-statement.org](http://www.prisma-statement.org).
